# Supplementary material for: Novel A-seco-nortriterpenoids from Ganoderma cochlear inhibiting Tau pathology by activating AMPK-ULK1-mediated autophagy
Source: Royal Society of Chemistry journal article supplement (doi:10.1039/d3qo02000b), 2024-01-01
Supplement: d3qo02000b1.pdf [file d3qo02000b1.pdf]

## **Novel A-*seco*-nortriterpenoids from *Ganoderma cochlear* inhibiting Tau pathology by activating AMPK-ULK1-mediated autophagy**

Rong-Can Luo,<sup>b,c,e</sup> Yi Luo,<sup>a,c</sup> Da-Shuang Fang,<sup>a,d</sup> Yong-Gang Yao,<sup>b,c</sup> Ming-Hua Qiu<sup>a,c\*</sup>, Xing-Rong Peng<sup>a,c\*</sup>

<sup>a</sup>*State Key Laboratory of Phytochemistry and Plant Resources in West China, Kunming Institute of Botany, Chinese Academy of Science, Kunming 650201, China*

<sup>b</sup>*Key Laboratory of Animal Models and Human Disease Mechanisms of the Chinese Academy of Sciences & Yunnan Province, and KIZ-CUHK Joint Laboratory of Bioresources and Molecular Research in Common Diseases, Kunming Institute of Zoology, Chinese Academy of Sciences, Kunming 650204, China*

<sup>c</sup>*Kunming College of Life Science, University of Chinese Academy of Sciences, Kunming 650204, China*

<sup>d</sup>*College of Chemical Engineering, Institute of Pharmaceutical Engineering Technology and Application, Key Laboratory of Green Chemistry of Sichuan Institutes of Higher Education, Sichuan University of Science & Engineering, Zigong 643000, Sichuan, China*

<sup>e</sup>*Gansu Key Laboratory of Biomonitoring and Bioremediation for Environmental Pollution, and Key Laboratory of Cell Activities and Stress Adaptations, Ministry of Education, School of Life Sciences, Lanzhou University, Lanzhou 730000, China*

## Table of Content

|                                                                   |    |
|-------------------------------------------------------------------|----|
| <b>Structural elucidation of compounds 5–10</b> .....             | 3  |
| <b>NMR spectra of new compounds 1–10</b> .....                    | 13 |
| <b>HRESIMS spectra of new compounds</b> .....                     | 43 |
| <b>X-ray crystallographic data of compounds 2, 4, and 5</b> ..... | 53 |
| <b>Calculated ECD data of compound 3</b> .....                    | 56 |
| <b>Uncropped images of western blot</b> .....                     | 64 |
| <b>References</b> .....                                           | 67 |

## 1. Structural elucidation of compounds 5–10

The molecular formula of ganolearate E (**5**) (**Figure S1**) was determined to be C<sub>28</sub>H<sub>40</sub>O<sub>6</sub> on the basis of HRESIMS ion peak  $m/z$ : 490.3162 [M + NH<sub>4</sub>]<sup>+</sup> (calcd. 490.3163). Its 1D NMR spectroscopic data (**Table S1**) showed similarity with those of cochlearic acid A with the only difference in the presence of an additional methoxyl at C-3, which was confirmed by the HMBC correlations (**Figure S2**) of OMe ( $\delta_{\text{H}}$  3.63, s) with C-3 ( $\delta_{\text{C}}$  174.1), of H<sub>2</sub>-1 and H<sub>2</sub>-2 with C-3, and of H<sub>3</sub>-19 with C-1, C-5, and C-10. The further X-ray crystallographic analysis (**Figure S3**) proved that the absolute configuration of **5** was 5*S*,7*S*,10*S*,13*R*,14*R*,17*S*,20*S*. Thus, the structure of compound **5** was determined.

Comparison of molecular weight and 1D NMR spectroscopic data (**Table S1**) between **6** and **5** showed that compound **6** had a similar structure with **5**, except for the absence of the terminal double bond at C-4 and C-28 and the presence of an additional ketone carbonyl ( $\delta_{\text{C}}$  214.0). The HMBC correlations of H<sub>3</sub>-29 with the ketone carbonyl and C-5 ( $\delta_{\text{C}}$  52.5), and of H<sub>3</sub>-19 with C-1, C-5, and C-9 ( $\delta_{\text{C}}$  137.3) confirmed that C-4 was the ketone carbonyl. Subsequently, the ROESY correlation of H-7/H<sub>3</sub>-30 proved that 7-OH was  $\beta$ -oriented. Finally, the structure of **6** (ganolearate F) was established.

Ganolearate G (**7**) had a molecular formula of C<sub>28</sub>H<sub>42</sub>O<sub>7</sub> determined by the HRESIMS  $m/z$ : 513.2821 [M + Na]<sup>+</sup> (calcd. 513.2823). Meanwhile, compound **7** showed similar 1D NMR spectra with those of compound **6**. However, an additional methoxyl group ( $\delta_{\text{H}}$  3.67, s;  $\delta_{\text{C}}$  51.4) was observed in 1D NMR spectra of **7**, rather than an oxygenated quaternary carbon in **6**. Furthermore, the methoxyl group showed HMBC correlation (**Figure S2**) with C-24 ( $\delta_{\text{C}}$  174.4), simultaneously, H<sub>3</sub>-21 exhibited a doublet methyl signals at  $\delta_{\text{H}}$  0.89 (d,  $J$  = 6.4 Hz) in the <sup>1</sup>H NMR spectrum of **7**. Thus, we speculated that the methoxyl was connected to C-24 and the oxygenated quaternary carbon at C-20 was transformed into a methine. Therefore, the structure of **7** was confirmed.

According to the 1D NMR spectra (**Table S2**) of **8**, the structure of **8** resembled that of **7** except for the absence of a methoxyl at C-24 and a ketone carbonyl instead of the hydroxyl at C-7. The HMBC correlations of H<sub>3</sub>-19 ( $\delta_{\text{H}}$  1.31, s) with C-5 ( $\delta_{\text{C}}$  52.5) and C-9 ( $\delta_{\text{C}}$  145.6), of H-5 ( $\delta_{\text{H}}$  3.05, t,  $J$  = 4.5 Hz) with C-10 ( $\delta_{\text{C}}$  39.2) and C-7 ( $\delta_{\text{C}}$  196.7), of H<sub>3</sub>-21 ( $\delta_{\text{H}}$  0.88, d,  $J$  = 6.4 Hz) with C-20 ( $\delta_{\text{C}}$  35.6), C-17 ( $\delta_{\text{C}}$  49.0), and C-22 ( $\delta_{\text{C}}$  30.6), and of H<sub>2</sub>-22 ( $\delta_{\text{H}}$  2.20, m; 2.46, m) with C-24 ( $\delta_{\text{C}}$  178.8) confirmed above deduction. Thus, the structure of **8** was determined and name as ganoclearic acid

H.

The molecular formula of compound **9** was determined to be C<sub>26</sub>H<sub>36</sub>O<sub>6</sub> based on the HRESIMS *m/z*: 445.2586 [M + H]<sup>+</sup> (calcd. 445.2585) with **9** degrees of unsaturation. Its <sup>1</sup>H NMR spectrum (**Table S2**) showed that three singlet methyl proton signals at δ<sub>H</sub> 0.91 (s), δ<sub>H</sub> 1.25 (s), δ<sub>H</sub> 1.77 (s), one doublet methyl proton signal at δ<sub>H</sub> 0.88 (d, *J* = 6.4 Hz), one methoxyl proton signal at δ<sub>H</sub> 3.63 (s), one oxymethine proton signal at δ<sub>H</sub> 4.59 (d, *J* = 5.2 Hz), and two terminal double bond proton signals at δ<sub>H</sub> 4.84 (s) and δ<sub>H</sub> 4.94 (s). except for the methoxyl, <sup>13</sup>C-DEPT NMR spectra of **9** showed 25 carbon resonances, which were assigned as four methyls, eight methylenes (one terminal double bond), four methines (one oxymethine), and nine quaternary carbons (one ester carbonyl, one carboxyl, one ketone, three olefinic carbons, and one oxygenated carbon). These data suggested that compound **9** was a highly degraded lanostane triterpenoid and had a similar 7/6/5-tricyclo skeleton with that of cochlate B, which was confirmed by the HMBC correlations (**Figure S2**) of H<sub>3</sub>-29 with C-4 (δ<sub>C</sub> 145.8), C-28 (δ<sub>C</sub> 114.7), and C-5 (δ<sub>C</sub> 54.8), of H-5 (δ<sub>H</sub> 2.75, m) with C-1 (δ<sub>C</sub> 31.8), C-10 (δ<sub>C</sub> 83.5), C-7 (δ<sub>C</sub> 75.0), and C-19 (δ<sub>C</sub> 36.0), of H-7 (δ<sub>H</sub> 4.50, d, *J* = 5.2 Hz) with C-5, C-9, and C-10, C-14 (δ<sub>C</sub> 50.8), and of H<sub>2</sub>-19 with C-1, C-8 (δ<sub>C</sub> 167.9), and C-11 (δ<sub>C</sub> 201.2). However, combination the absence of two methylenes and the HMBC correlations (**Figure S2**) of H<sub>3</sub>-21 (δ<sub>H</sub> 1.16, d, *J* = 6.5 Hz) with C-17 (δ<sub>C</sub> 47.7), C-20 (δ<sub>C</sub> 45.1), and C-22 (δ<sub>C</sub> 181.7), indicating that C-23 and C-24 were degraded. The ROESY correlations (**Figure S2**) of H-5/H<sub>3</sub>-30/H-7, which demonstrated that H-7 was α-oriented. Therefore, the structure of **9** was established and named as ganoclearic acid I.

Ganolearate J (**10**) had a molecular formula of C<sub>28</sub>H<sub>40</sub>O<sub>7</sub> based on the HRESIMS *m/z*: 511.2673 [M + Na]<sup>+</sup> (calcd. 511.2666). Its 1D NMR spectroscopic data (**Table S2**) were similar with those of cochlate A with the difference in the absence of double bond at C-4 and C-28 and the presence of one oxygenated methylene (δ<sub>H</sub> 3.77, d, *J* = 12.0 Hz, 4.21, d, *J* = 12.0 Hz; δ<sub>C</sub> 64.9) and one quaternary carbon containing oxygen (δ<sub>C</sub> 86.0). The detailed analysis of HMBC spectrum (**Figure S2**) of **10** showed the correlations of H<sub>3</sub>-29 (δ<sub>H</sub> 1.39, s) and H-5 (δ<sub>H</sub> 2.36, d, *J* = 7.6 Hz) with the oxygenated methylene and quaternary carbons, suggesting that C-4 and C-28 were linked to hydroxyl group, respectively. Considering the molecular weight of **10** and the chemical shift of C-3 (δ<sub>C</sub> 175.8), an ester bond between C-4 and C-3 was deduced. Finally, the structure of **10** was determined.

**Table S1.** <sup>1</sup>H and <sup>13</sup>C-DEPT NMR spectroscopic data of **1–7** (600/150 MHz,  $\delta$  in ppm, *J* in Hz).

| position | <b>1<sup>a</sup></b>              |                         | <b>2<sup>a</sup></b>                            |                         | <b>3<sup>a</sup></b>              |                         | <b>4<sup>a</sup></b>                   |                         | <b>5<sup>a</sup></b>              |                         | <b>6<sup>b</sup></b>              |                         | <b>7<sup>b</sup></b>                   |                         |
|----------|-----------------------------------|-------------------------|-------------------------------------------------|-------------------------|-----------------------------------|-------------------------|----------------------------------------|-------------------------|-----------------------------------|-------------------------|-----------------------------------|-------------------------|----------------------------------------|-------------------------|
|          | $\delta_{\text{H}}$               | $\delta_{\text{C}}$     | $\delta_{\text{H}}$                             | $\delta_{\text{C}}$     | $\delta_{\text{H}}$               | $\delta_{\text{C}}$     | $\delta_{\text{H}}$                    | $\delta_{\text{C}}$     | $\delta_{\text{H}}$               | $\delta_{\text{C}}$     | $\delta_{\text{H}}$               | $\delta_{\text{C}}$     | $\delta_{\text{H}}$                    | $\delta_{\text{C}}$     |
| 1        |                                   |                         | 1.58, m                                         | 31.7<br>CH <sub>2</sub> | 1.86, m; 2.19, m                  | 34.8<br>CH <sub>2</sub> | 2.60, m;<br>1.84, m                    | 31.7<br>CH <sub>2</sub> | 1.94, m; 2.16, m                  | 33.1<br>CH <sub>2</sub> | 1.89, m; 2.13, m                  | 35.1<br>CH <sub>2</sub> | 1.70, m;<br>2.31, m                    | 33.6<br>CH <sub>2</sub> |
| 2        |                                   |                         | 2.49, m                                         | 31.2<br>CH <sub>2</sub> | 2.26, m; 2.46, m                  | 29.3<br>CH <sub>2</sub> | 2.10, m;<br>1.46, m                    | 29.0<br>CH <sub>2</sub> | 1.97, m;<br>2.21, m               | 29.4<br>CH <sub>2</sub> | 2.20, m; 2.33, m                  | 30.2<br>CH <sub>2</sub> | 2.54, m;<br>1.36, m                    | 29.4<br>CH <sub>2</sub> |
| 3        |                                   |                         |                                                 | 174.8<br>C              |                                   | 174.0<br>C              |                                        | 176.7<br>C              |                                   | 174.1<br>C              |                                   | 175.9<br>C              |                                        | 173.8<br>C              |
| 4        |                                   | 203.9<br>C              |                                                 |                         |                                   | 205.4<br>C              |                                        |                         |                                   | 147.0<br>C              |                                   | 214.0<br>C              |                                        | 217.1<br>C              |
| 5        |                                   | 131.2<br>C              | 1.44, m                                         | 27.2<br>CH              | 1.62, m                           | 35.7<br>CH              | 3.15, d<br>(8.8)                       | 48.5<br>CH              | 2.13, m                           | 44.7<br>CH              | 2.83, m                           | 52.5<br>CH              | 2.92, m                                | 50.9<br>CH              |
| 6        | 7.54, d (7.9)                     | 131.2<br>CH             | 1.09, dd, (7.8, 4.3);<br>0.29, dd, (7.2, 4.3)   | 17.3<br>CH <sub>2</sub> | 2.04, m                           | 39.2<br>CH              | 1.78, m<br>2.52, m                     | 38.5<br>CH <sub>2</sub> | 2.06, m; 2.14, m                  | 32.4<br>CH <sub>2</sub> | 2.49, m; 2.67, m                  | 32.1<br>CH <sub>2</sub> | 2.10, m                                | 28.8<br>CH <sub>2</sub> |
| 7        | 7.47, d (7.9)                     | 122.6<br>CH             | 1.85, m                                         | 22.5<br>CH              | 2.47, m                           | 34.0<br>CH              | 5.36, t<br>(7.3)                       | 77.2<br>CH              | 4.29, t (6.0)                     | 66.8<br>CH              | 4.23, t (6.0)                     | 64.3<br>CH              | 4.03, dd<br>(10.4, 4.0)                | 62.5<br>CH              |
| 8        |                                   | 152.8<br>C              |                                                 | 174.5<br>C              |                                   | 171.8<br>C              |                                        | 174.1<br>C              |                                   | 160.7<br>C              |                                   | 160.5<br>C              |                                        | 158.6<br>C              |
| 9        |                                   | 140.7<br>C              |                                                 | 137.7<br>C              |                                   | 135.6<br>C              |                                        | 133.7<br>C              |                                   | 137.2<br>C              |                                   | 137.3<br>C              |                                        | 135.1<br>C              |
| 10       |                                   | 138.1<br>C              |                                                 | 48.8<br>CH              |                                   | 49.7 C                  |                                        | 89.3 C                  |                                   | 39.1 C                  |                                   | 38.6 C                  |                                        | 37.4 C                  |
| 11       |                                   | 200.4<br>C              |                                                 | 197.5<br>C              |                                   | 196.3<br>C              |                                        | 198.9<br>C              |                                   | 199.1<br>C              |                                   | 202.0<br>C              |                                        | 200.1<br>C              |
| 12       | 2.58, d (18.8);<br>2.91, d (18.8) | 52.3<br>CH <sub>2</sub> | 2.43, d, (7.4)                                  | 50.1<br>CH <sub>2</sub> | 2.38, d (17.6);<br>2.54, d (17.6) | 49.2<br>CH <sub>2</sub> | 2.58, d<br>(16.6)<br>2.69, d<br>(16.6) | 49.6<br>CH <sub>2</sub> | 2.62, d (17.4);<br>2.74, d (17.4) | 51.1<br>CH <sub>2</sub> | 2.51, d (18.0);<br>2.77, d (18.0) | 52.3<br>CH <sub>2</sub> | 2.43, d<br>(18.8)<br>2.59, d<br>(18.8) | 51.4<br>CH <sub>2</sub> |
| 13       |                                   | 45.2 C                  |                                                 | 48.1 C                  |                                   | 48.0 C                  |                                        | 49.7 C                  |                                   | 45.6 C                  |                                   | 46.5 C                  |                                        | 44.1 C                  |
| 14       |                                   | 52.3 C                  |                                                 | 48.2 C                  |                                   | 49.7 C                  |                                        | 49.8 C                  |                                   | 51.9 C                  |                                   | 52.8 C                  |                                        | 51.2 C                  |
| 15       | 5.60, dd (9.5,<br>5.1)            | 74.1<br>CH              | 2.27, dd, (12.8, 7.9);<br>1.88, dd, (12.8, 4.8) | 40.9<br>CH <sub>2</sub> | 1.52, m; 1.72, m                  | 29.5<br>CH <sub>2</sub> | 1.25, m;<br>2.15, m                    | 29.3<br>CH <sub>2</sub> | 1.47, m; 2.56, m                  | 30.2<br>CH <sub>2</sub> | 1.43, m; 2.20, m                  | 30.7<br>CH <sub>2</sub> | 1.25, m;<br>2.15, m                    | 29.5<br>CH <sub>2</sub> |
| 16       | 2.20, m; 1.94, m                  | 39.0<br>CH <sub>2</sub> | 4.71, dd, (12.9, 5.9)                           | 72.0<br>CH              | 2.12, m; 1.51, m                  | 27.4<br>CH <sub>2</sub> | 1.45, m;<br>2.05, m                    | 27.8<br>CH <sub>2</sub> | 1.71, m; 1.89, m                  | 21.7<br>CH <sub>2</sub> | 1.95, m; 1.65, m                  | 22.8<br>CH <sub>2</sub> | 1.45, m;<br>2.03, m                    | 27.3<br>CH <sub>2</sub> |
| 17       | 1.90 m                            | 49.0<br>CH              | 1.73, m                                         | 54.7<br>CH              | 1.76, m                           | 49.2<br>CH              | 1.72, m                                | 48.9<br>CH              | 2.19 m                            | 52.9<br>CH              | 2.34, m                           | 54.3<br>CH              | 1.63, m                                | 50.5<br>CH              |
| 18       | 0.74, s                           | 18.5<br>CH <sub>3</sub> | 1.05, s                                         | 17.7<br>CH <sub>3</sub> | 0.77, s                           | 17.4<br>CH <sub>3</sub> | 0.87, s                                | 17.2<br>CH <sub>3</sub> | 1.11, s                           | 19.2<br>CH <sub>3</sub> | 1.15, s                           | 19.7<br>CH <sub>3</sub> | 1.10, s                                | 17.7<br>CH <sub>3</sub> |
| 19       | 2.57, s                           | 18.3                    | 1.21, s                                         | 24.5                    | 1.30, s                           | 22.5                    | 1.50, s                                | 27.7                    | 1.25 s                            | 22.4                    | 1.23, s                           | 22.4                    | 1.17, s                                | 21.2                    |

|                     |                  |                               |               |                               |                  |                               |                     |                               |                  |                           |                  |                           |                     |                               |
|---------------------|------------------|-------------------------------|---------------|-------------------------------|------------------|-------------------------------|---------------------|-------------------------------|------------------|---------------------------|------------------|---------------------------|---------------------|-------------------------------|
| 20                  | 1.40, m          | CH <sub>3</sub><br>35.4<br>CH | 1.75, m       | CH <sub>3</sub><br>29.5<br>CH | 1.46, m          | CH <sub>3</sub><br>35.7<br>CH | 1.45, m             | CH <sub>3</sub><br>35.5<br>CH |                  | CH <sub>3</sub><br>87.7 C |                  | CH <sub>3</sub><br>90.1 C | 1.43, m             | CH <sub>3</sub><br>35.6<br>CH |
| 21                  | 0.90, d (6.4)    | 17.7<br>CH <sub>3</sub>       | 0.94, d (5.6) | 18.0<br>CH <sub>3</sub>       | 0.89, d (6.3)    | 17.8<br>CH <sub>3</sub>       | 0.91, d<br>(6.4)    | 18.1<br>CH <sub>3</sub>       | 1.45, s          | 26.0<br>CH <sub>3</sub>   | 1.46, s          | 26.3<br>CH <sub>3</sub>   | 0.89, d (6.4)       | 17.7<br>CH <sub>3</sub>       |
| 22                  | 1.31, m; 1.82, m | 30.7<br>CH <sub>2</sub>       | 2.46, m       | 30.3<br>CH <sub>2</sub>       | 1.33, m; 1.83, m | 30.7<br>CH <sub>2</sub>       | 1.84, m;<br>1.34, m | 31.0<br>CH <sub>2</sub>       | 2.03, m; 2.17, m | 32.4<br>CH <sub>2</sub>   | 1.98, m; 2.23, m | 34.5<br>CH <sub>2</sub>   | 1.84, m;<br>1.34, m | 30.8<br>CH <sub>2</sub>       |
| 23                  | 2.27, m;         |                               | 1.97, m       | 30.7<br>CH <sub>2</sub>       | 2.27, m; 2.40, m | 31.0<br>CH <sub>2</sub>       | 2.24, m;<br>2.48, m | 31.1<br>CH <sub>2</sub>       | 2.49, m          | 27.9<br>CH <sub>2</sub>   | 2.45, m; 2.69, m | 28.6<br>CH <sub>2</sub>   | 2.24, m;<br>2.48, m | 31.1<br>CH <sub>2</sub>       |
| 24                  | 2.39, m          | 31.0<br>CH <sub>2</sub>       |               | 176.2<br>C                    |                  | 178.7<br>C                    |                     | 174.4<br>C                    |                  | 177.1<br>C                |                  | 180.1<br>C                |                     | 174.4<br>C                    |
| 28                  |                  | 174.2<br>C                    |               |                               |                  |                               |                     |                               | 4.82, s; 5.05, s | 114.9<br>CH               |                  |                           |                     |                               |
| 29                  |                  |                               |               |                               | 2.25, s          | 30.5<br>CH <sub>3</sub>       |                     |                               | 1.83, s          | 24.0<br>CH <sub>3</sub>   | 2.21, s          | 31.3<br>CH <sub>3</sub>   | 2.28, s             | 33.5<br>CH <sub>3</sub>       |
| 30                  | 2.55, s          | 30.9<br>CH <sub>3</sub>       | 1.11, s       | 26.3<br>CH <sub>3</sub>       | 1.16, s          | 24.7<br>CH <sub>3</sub>       | 1.13, s             | 24.4<br>CH <sub>3</sub>       | 1.17, s          | 25.7<br>CH <sub>3</sub>   | 1.13, s          | 26.6<br>CH <sub>3</sub>   | 0.99, s             | 26.1<br>CH <sub>3</sub>       |
| 3-OCH <sub>3</sub>  | 1.21, s          | 19.3<br>CH <sub>3</sub>       | 3.66, s       | 51.8<br>CH <sub>3</sub>       | 3.63, s          | 51.6<br>CH <sub>3</sub>       | 3.67, s             | 51.5<br>CH <sub>3</sub>       | 3.63, s          | 51.5<br>CH <sub>3</sub>   | 3.63, s          | 52.1<br>CH <sub>3</sub>   | 3.67, s             | 51.7<br>CH <sub>3</sub>       |
| 24-OCH <sub>3</sub> | 3.68, s          | 51.6<br>CH <sub>3</sub>       | 3.71, s       | 52.3<br>CH <sub>3</sub>       |                  |                               |                     |                               |                  |                           |                  |                           | 3.67, s             | 51.4<br>CH <sub>3</sub>       |

<sup>a</sup>: CDCl<sub>3</sub>; <sup>b</sup>: CD<sub>3</sub>OD



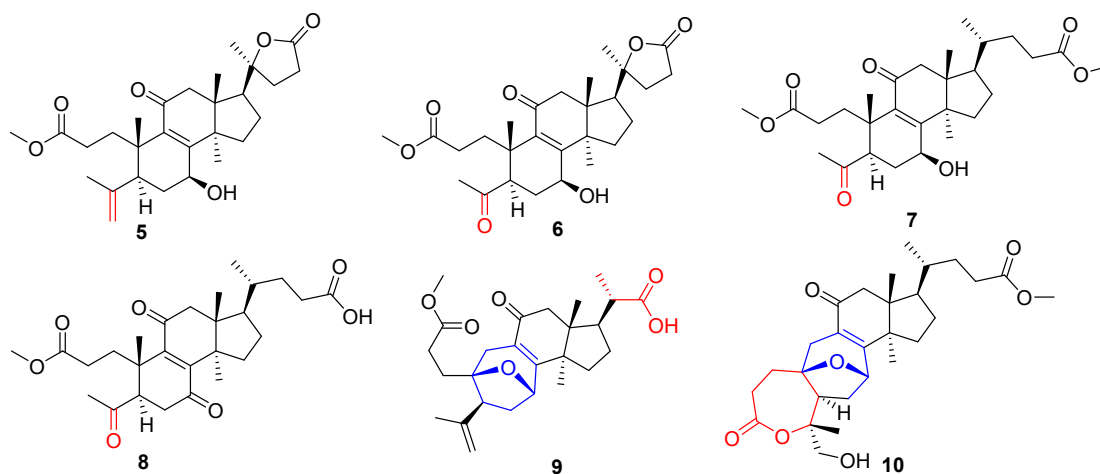

**Figure S1.** Structures of compounds 5–10.

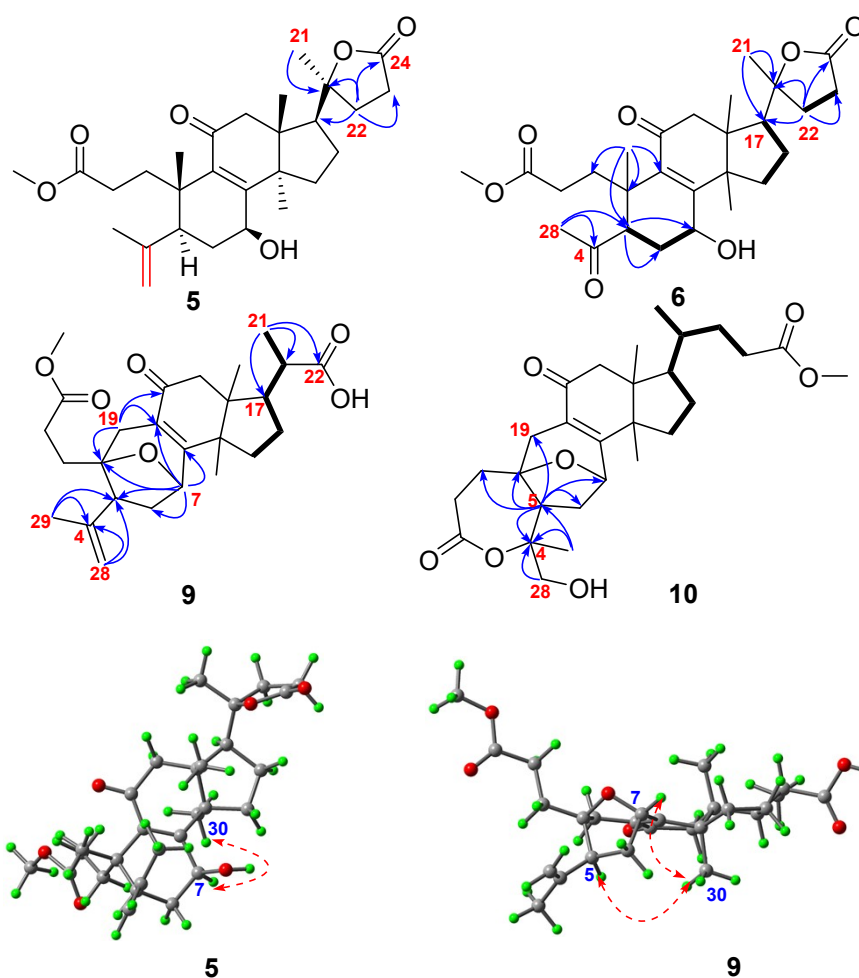

**Figure S2.** Selected HMBC (H→C),  $^1\text{H}$ - $^1\text{H}$  COSY (H-H) correlations of compounds 5, 6, 9, 10, and ROESY (↔) correlations of compounds 5 and 9.



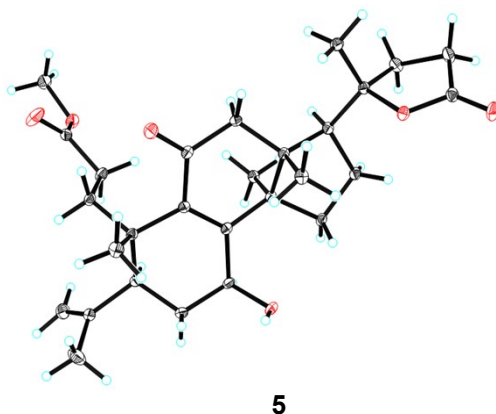

**Figure S3.** X-ray crystallographic structure of compound **5**.

## **2. Autophagy activation of compounds 1–10**

In order to test whether compounds **1–10** would affect autophagy, we used the SH-SY5Y mCherry-GFP-LC3 cell line, which contains the tandem monomeric mCherry-GFP-tagged LC3 (mCherry-GFP-LC3) reporter and was reported in our previous study.<sup>[1]</sup> The mCherry-GFP-LC3 in autolysosomes displayed more stable red mCherry fluorescence in the acidic lysosome while the GFP signal was sensitive to the acidic condition.<sup>[2]</sup> DMSO (dimethyl sulfoxide) and rapamycin were respectively as blank and positive controls.<sup>[3]</sup> The flow cytometry analysis results showed that compounds **1–10** significantly increased the autophagic flux (**Figure S4A–B**). Moreover, all of them displayed no toxicities in SH-SY5Y mCherry-GFP-LC3 cells by using the CCK-8 assay (**Figure S5A**). Compounds **1–4** with diverse rearranged skeleton were further investigated for their effect on autophagy and anti-ADs. Treatment with compounds **1–4** can increase autophagic flux in the SH-SY5Y mCherry-GFP-LC3 cells, similar as rapamycin (**Figure S5B–C**). Collectively, these results demonstrated that compounds **1–4** can activate autophagy.

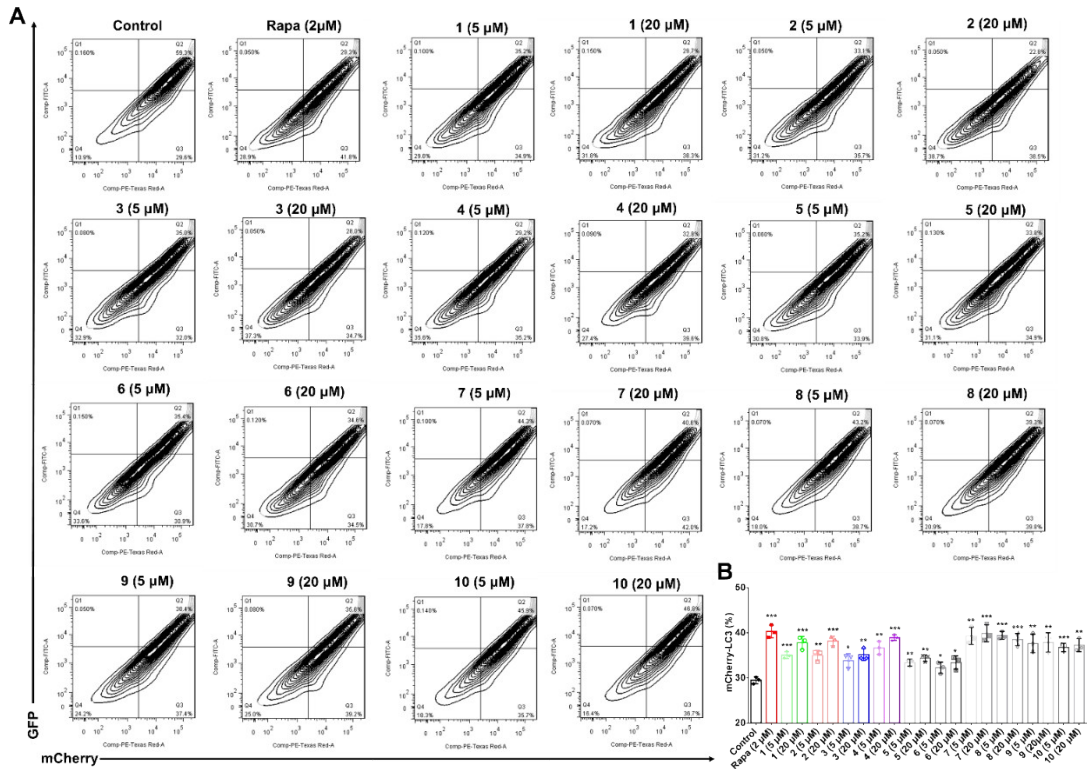

**Figure S4.** Compounds 1–10 induced autophagy in SH-SY5Y mCherry-GFP-LC3 cells by flow cytometry analysis. (A) Flow cytometry of SH-SY5Y mCherry-GFP-LC3 cells with or without drug treatment. The percentage of 10,000 cells expressing GFP or/and mCherry were counted. The Q1 area represents the proportion of cells with green fluorescence; the Q2 area represents the proportion of cells with yellow fluorescence; the Q3 area represents the proportion of cells with only red fluorescence; the Q4 area represents the proportion of cells showing no red and green fluorescence. (B) Quantification of the Q3 area in (A) based on 3 independent experiments. Record the proportion of cells that only emit red fluorescence in Q3 area under each treatment.

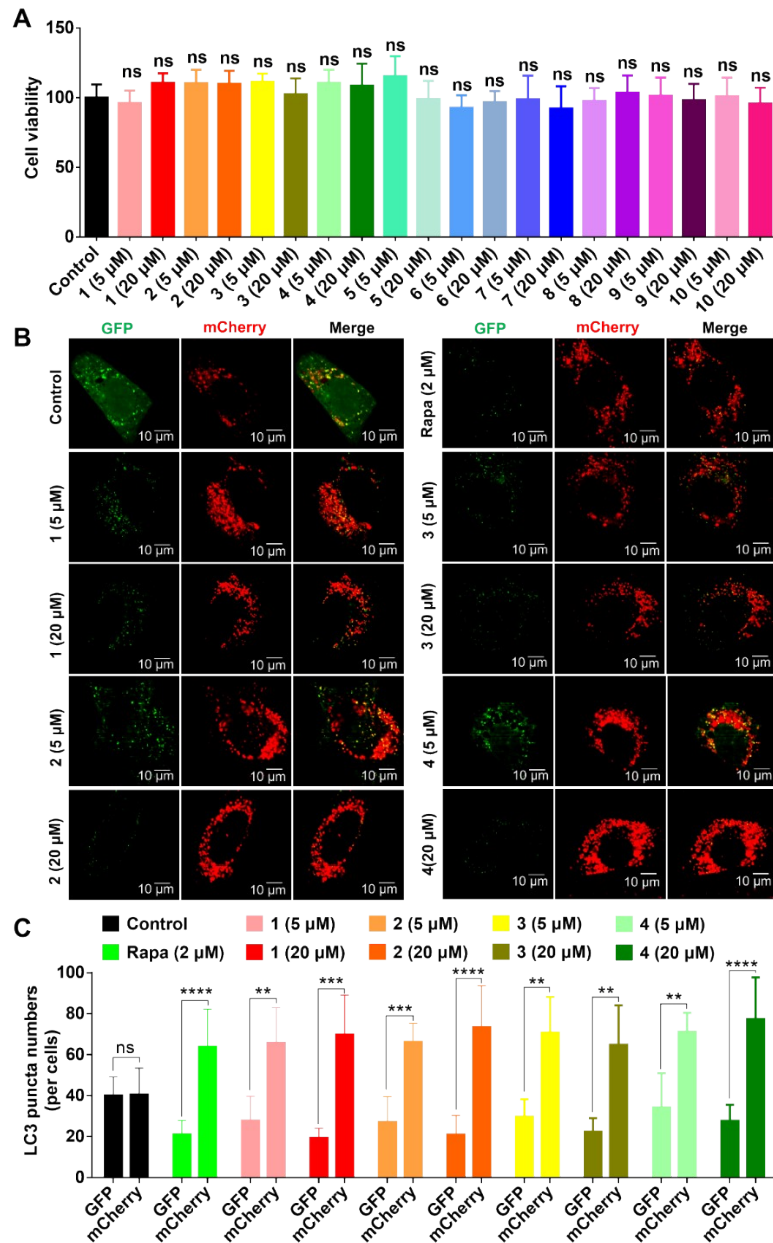

**Figure S5.** Increase of autophagic flux by compound 1–10 in SH-SY5Y mCherry-GFP-LC3 cells. (A) The CCK-8 assay showing the effects of compound 1–10 on cell viability. (B-C) Increased autophagic flux in response to 1–4 or Rapamycin (Rapa) treatment in SH-SY5Y mCherry-GFP-LC3 cells. (B) 1–4 treatment increased the maturation of autolysosomes as shown by the increased red puncta of mRFP-GFP-LC3 in cells, and this effect was similar to that of Rapamycin. (C) Quantification of LC3 puncta in (B) based on 3 independent experiments. ns, not significant; \*,  $P < 0.05$ ; \*\*,  $P < 0.01$ ; \*\*\*,  $P < 0.001$ ; \*\*\*\*,  $P < 0.0001$ ; one-way ANOVA with the Tukey’s post-hoc test. Bars represent mean  $\pm$  SD.

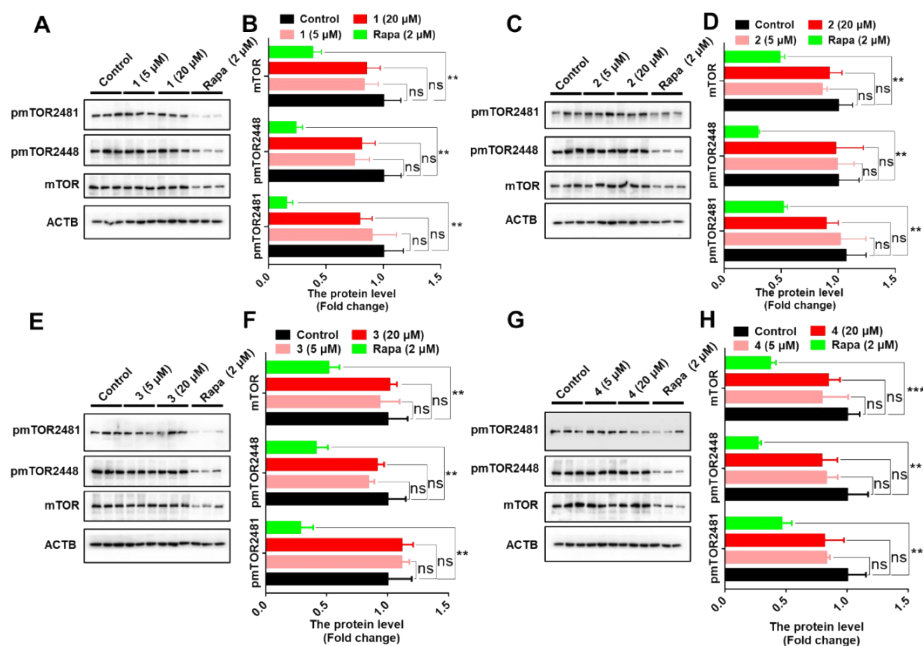

**Figure S6.** No inhibition effect of compounds 1–4 on mTOR. (A-H) Western blotting assays showing the protein levels of mTOR, pmTOR2448 and pmTOR2481 in the SH-SY5Y MAPT cells treated with or without compounds. Rapamycin (Rapa) as a positive control. (A-H) A representative Western blotting result (A, C, E, G) and quantification of respective protein levels (B, D, F, H) based on 3 independent experiments were presented. Relative protein abundance was normalized to ACTB. ns, not significant; \*\*,  $P < 0.01$ ; \*\*\*,  $P < 0.001$ ; one-way ANOVA with the Tukey's post-hoc test. Bars represent mean  $\pm$  SD.

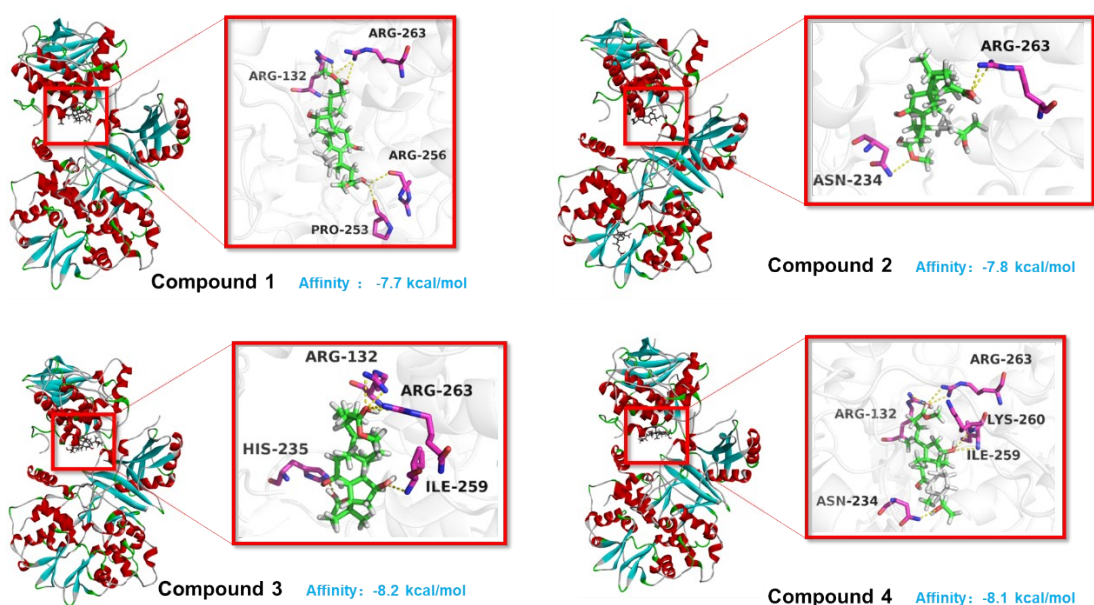

**Figure S7.** The molecular docking results of compounds 1–4 with AMPK (PDB: 4CFH).

## NMR spectra of new compounds 1–10

Figure S8.  $^1\text{H}$  NMR spectrum (600 MH,  $\text{CDCl}_3$ ) of compound 1.

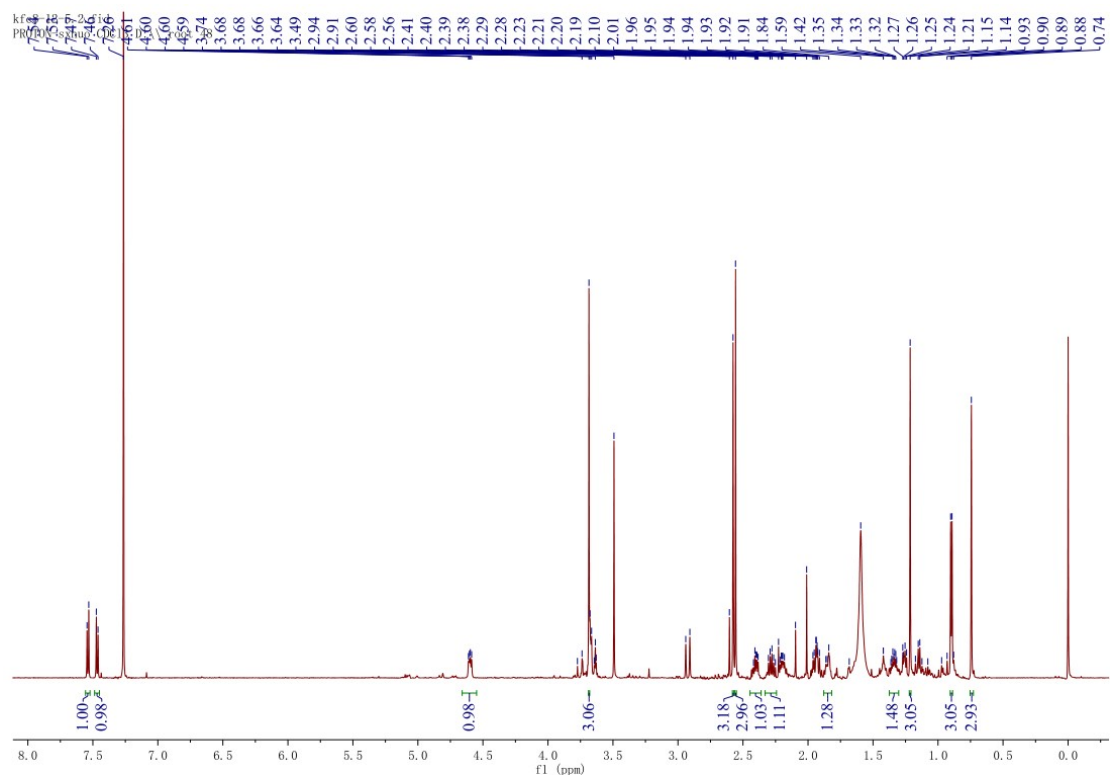

Figure S9.  $^{13}\text{C}$  NMR spectrum (150 MH,  $\text{CDCl}_3$ ) of compound 1.

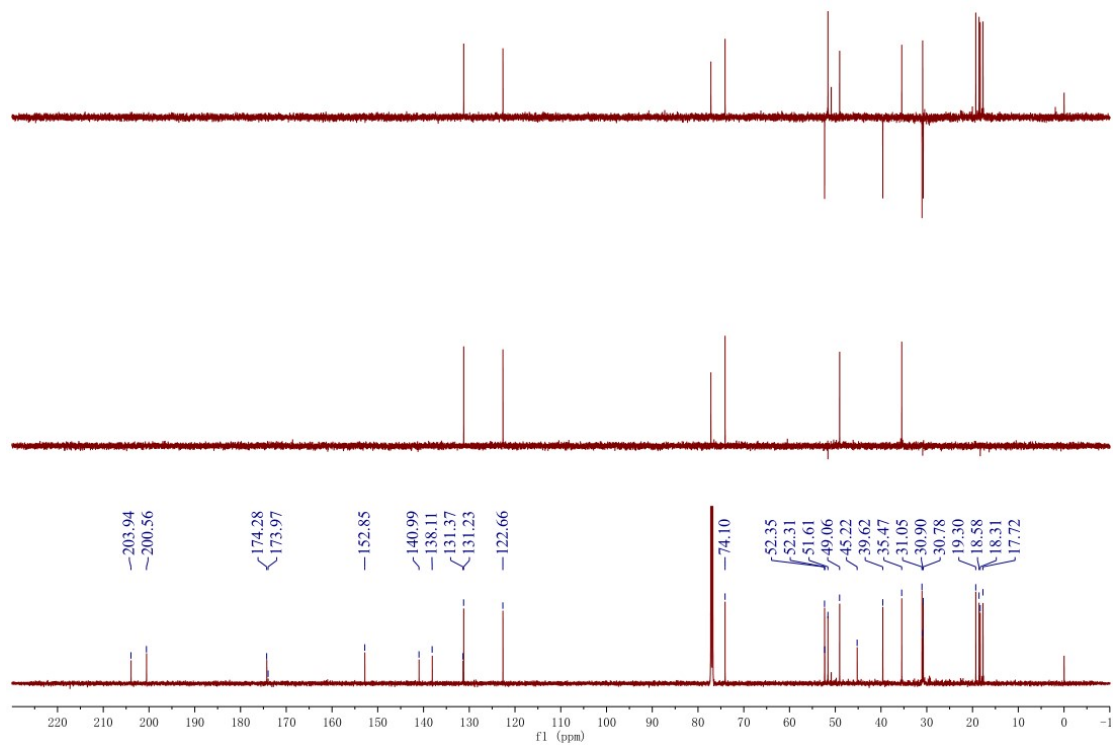

**Figure S10. HSQC spectrum (600/150 MH, CDCl<sub>3</sub>) of compound 1.**

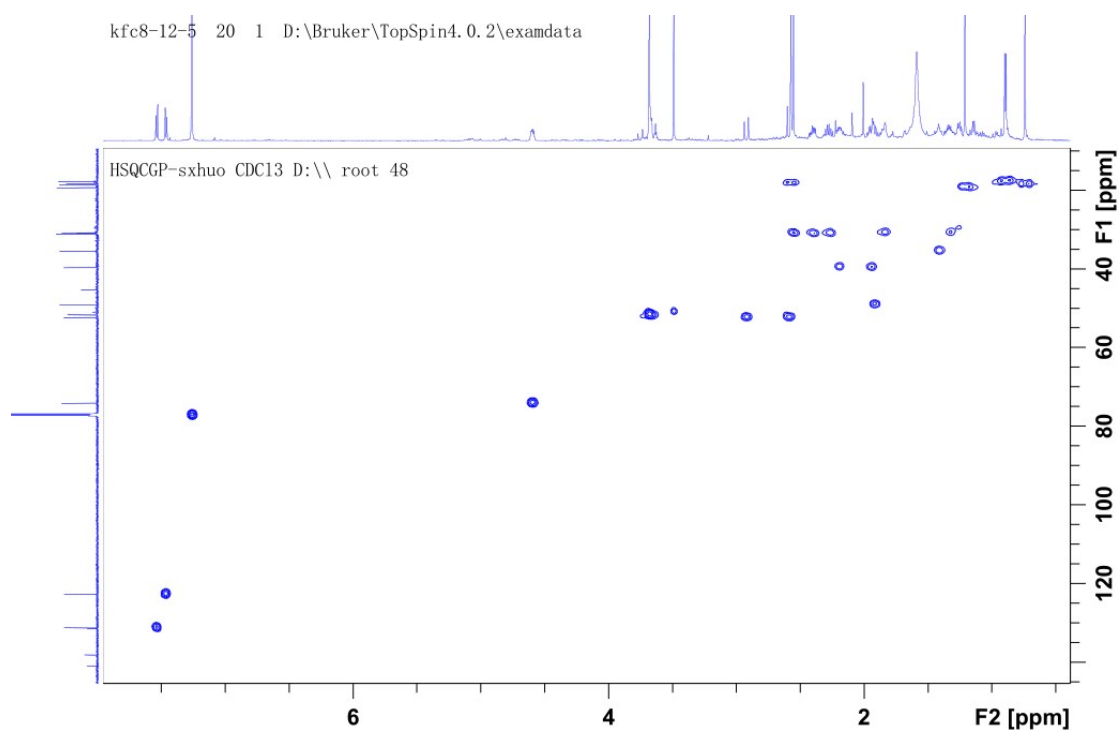

**Figure S11. HMBC spectrum (600/150 MH, CDCl<sub>3</sub>) of compound 1.**

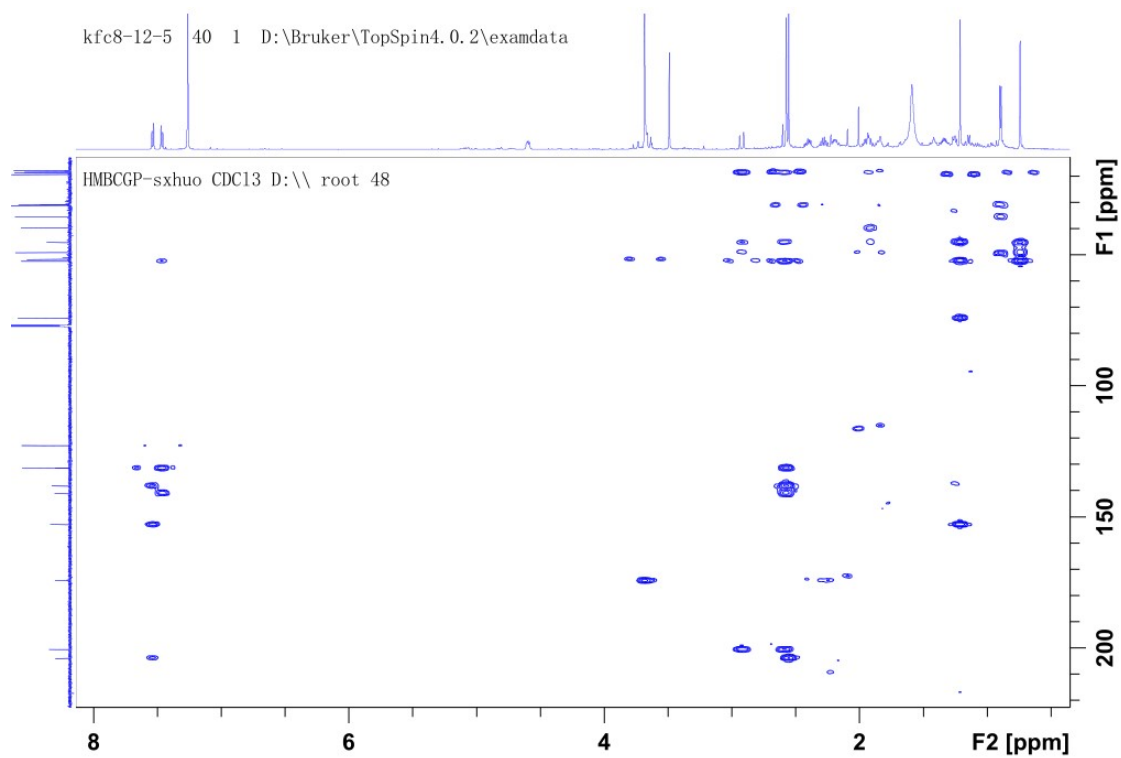

Figure S12.  $^1\text{H}$ - $^1\text{H}$  COSY spectrum (600 MHz,  $\text{CDCl}_3$ ) of compound 1.

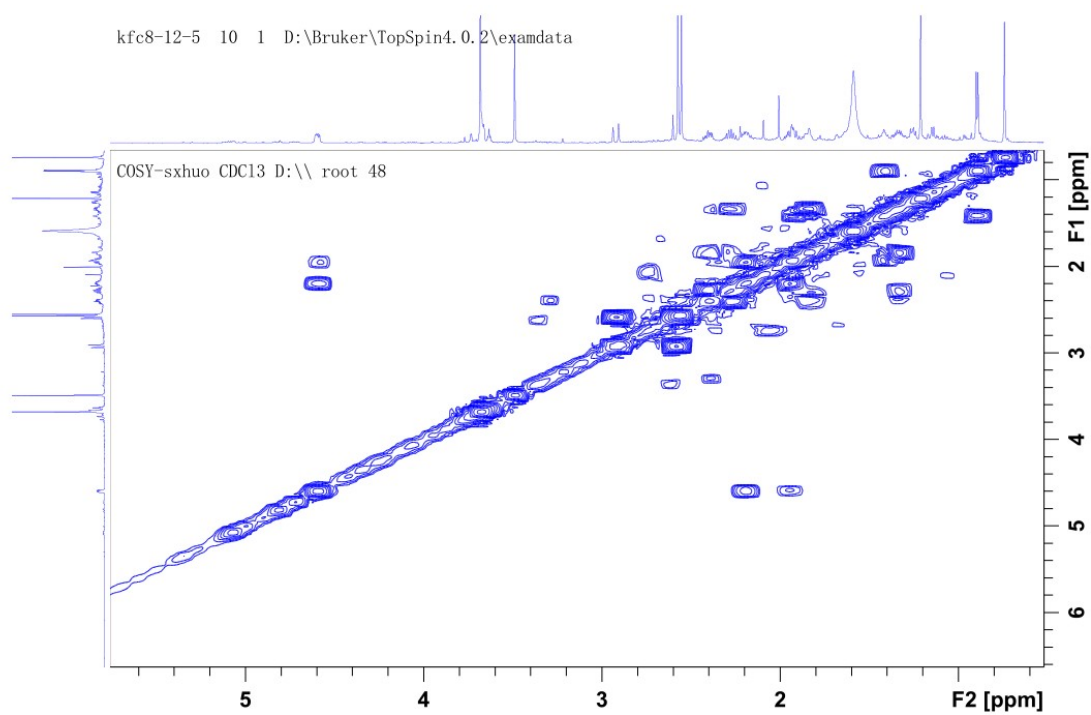

Figure S13. ROESY spectrum (600 MHz,  $\text{CDCl}_3$ ) of compound 1.

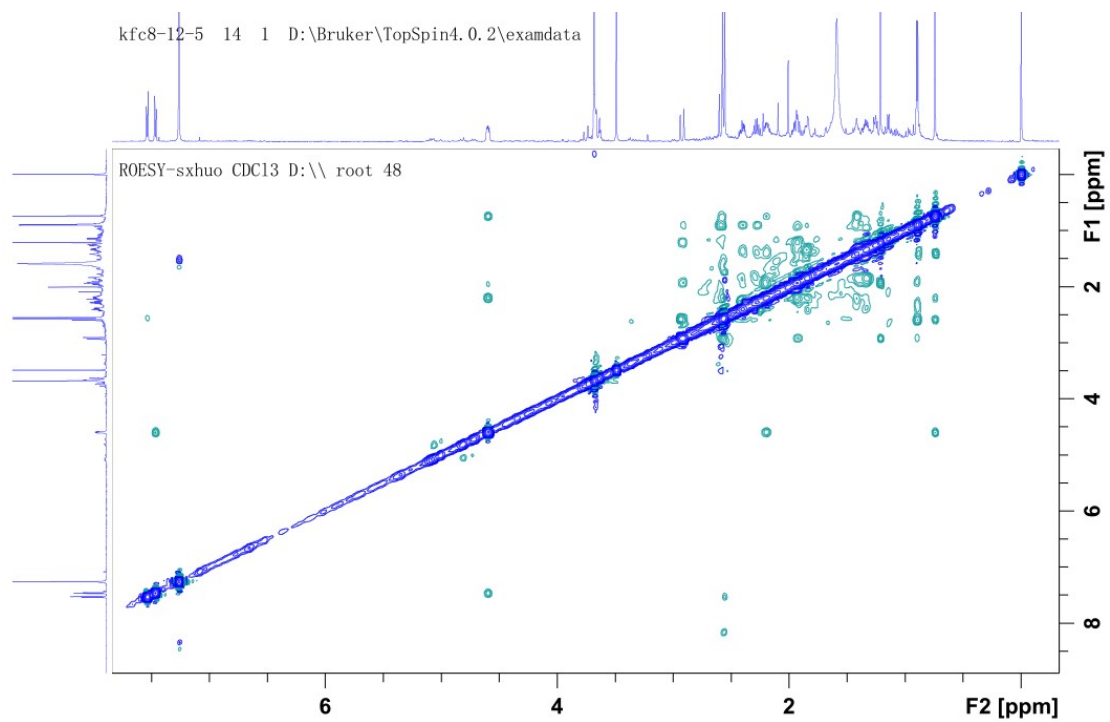

Figure S14. <sup>1</sup>H NMR spectrum (600 MHz, CDCl<sub>3</sub>) of compound 2.

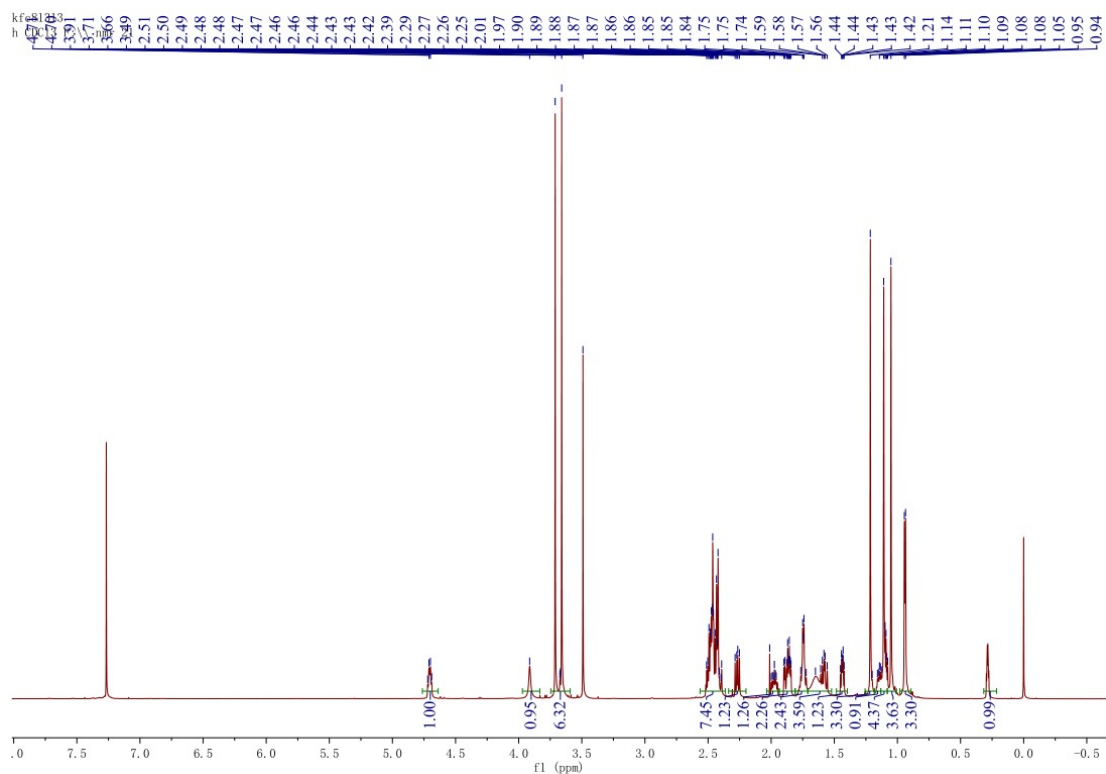

Figure S15. <sup>13</sup>C NMR spectrum (150 MHz, CDCl<sub>3</sub>) of compound 2.

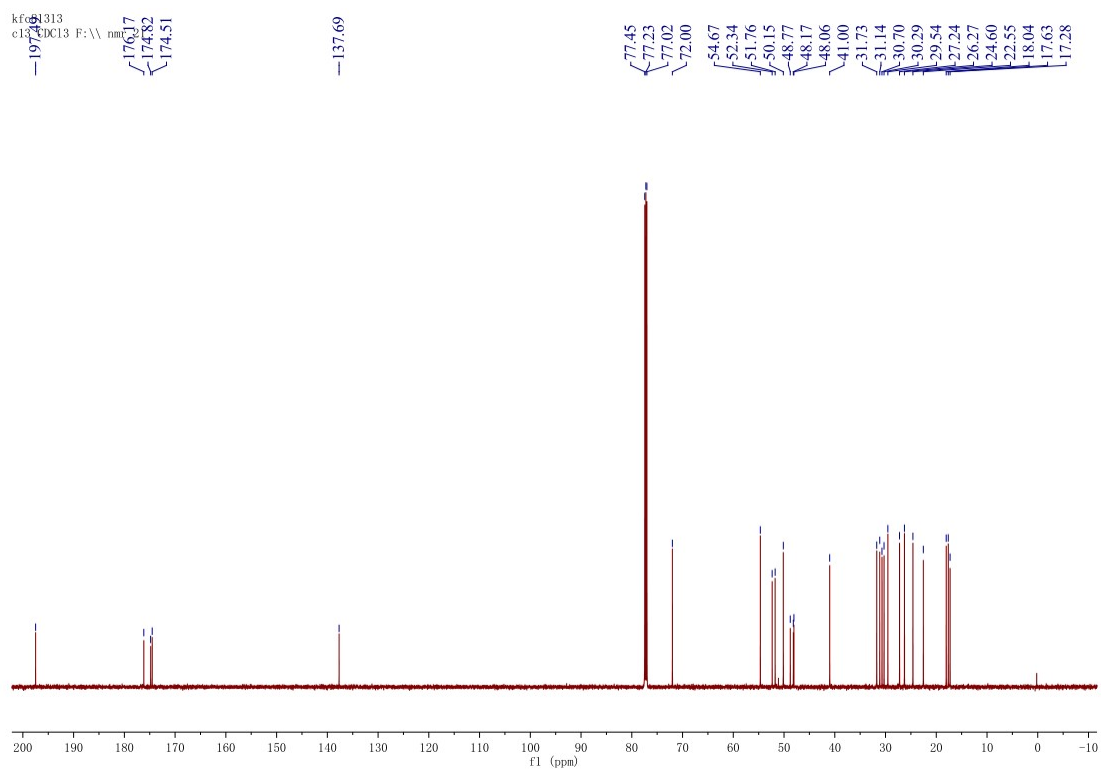



**Figure S16. HSQC spectrum (600/150 MH, CDCl<sub>3</sub>) of compound 2.**

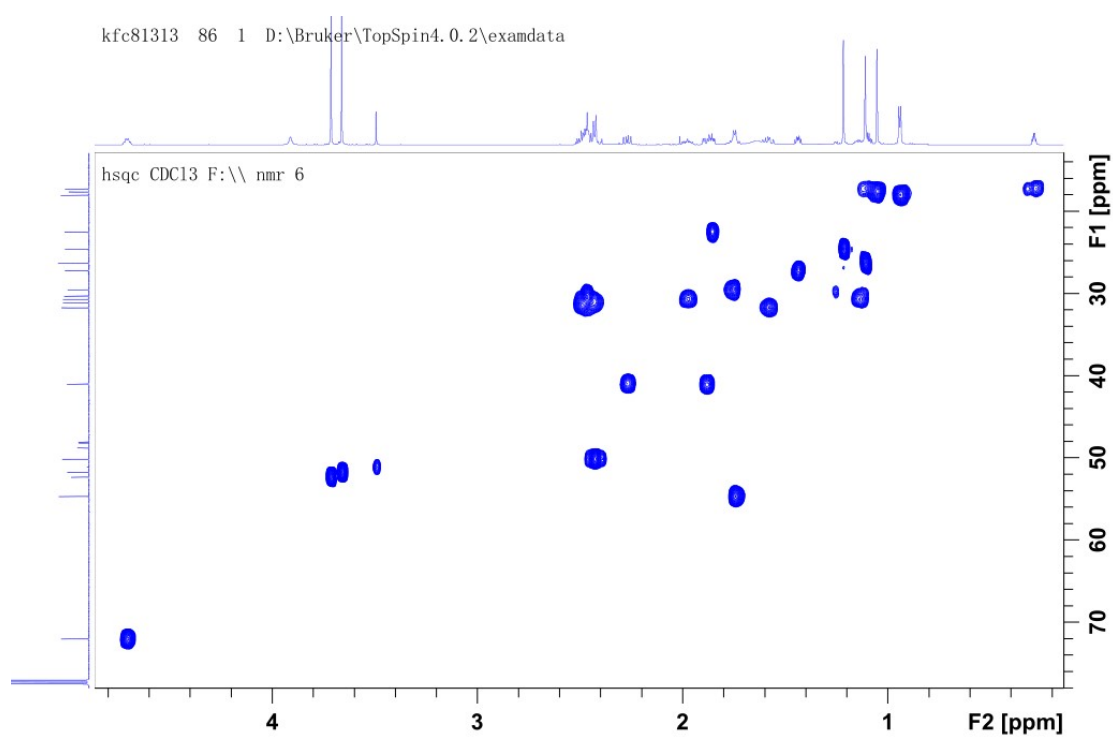

**Figure S17. HMBC spectrum (600/150 MH, CDCl<sub>3</sub>) of compound 2.**

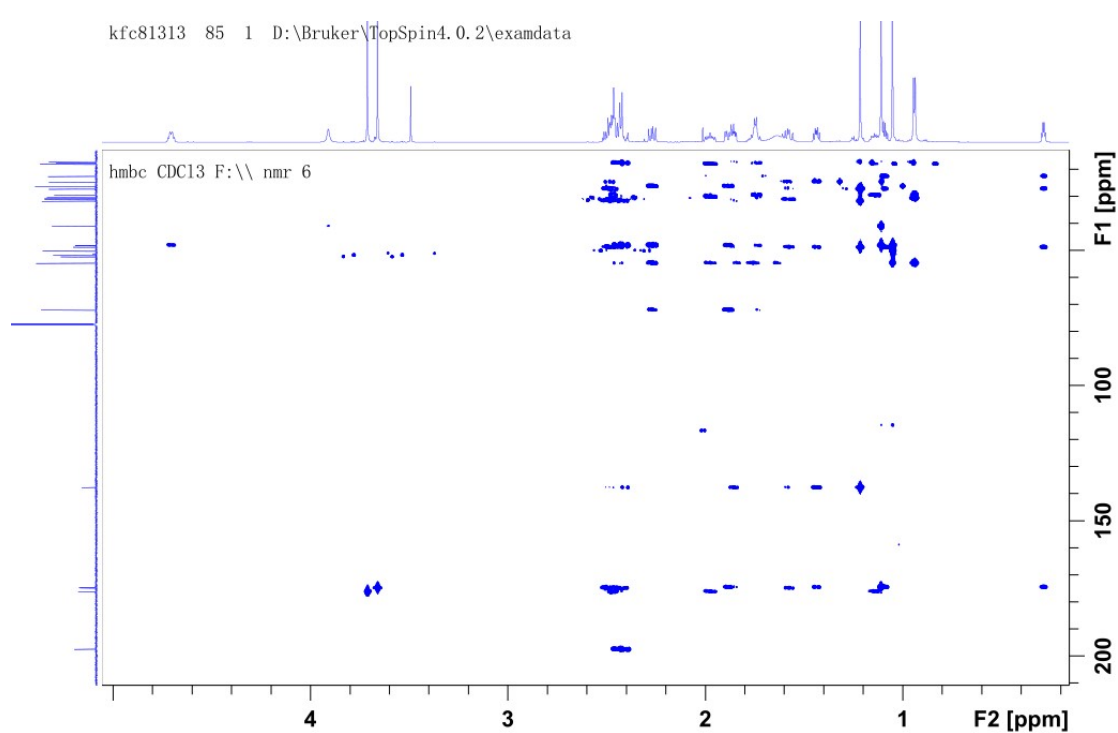

Figure S18.  $^1\text{H}$ - $^1\text{H}$  COSY spectrum (150 MHz,  $\text{CDCl}_3$ ) of compound 2.

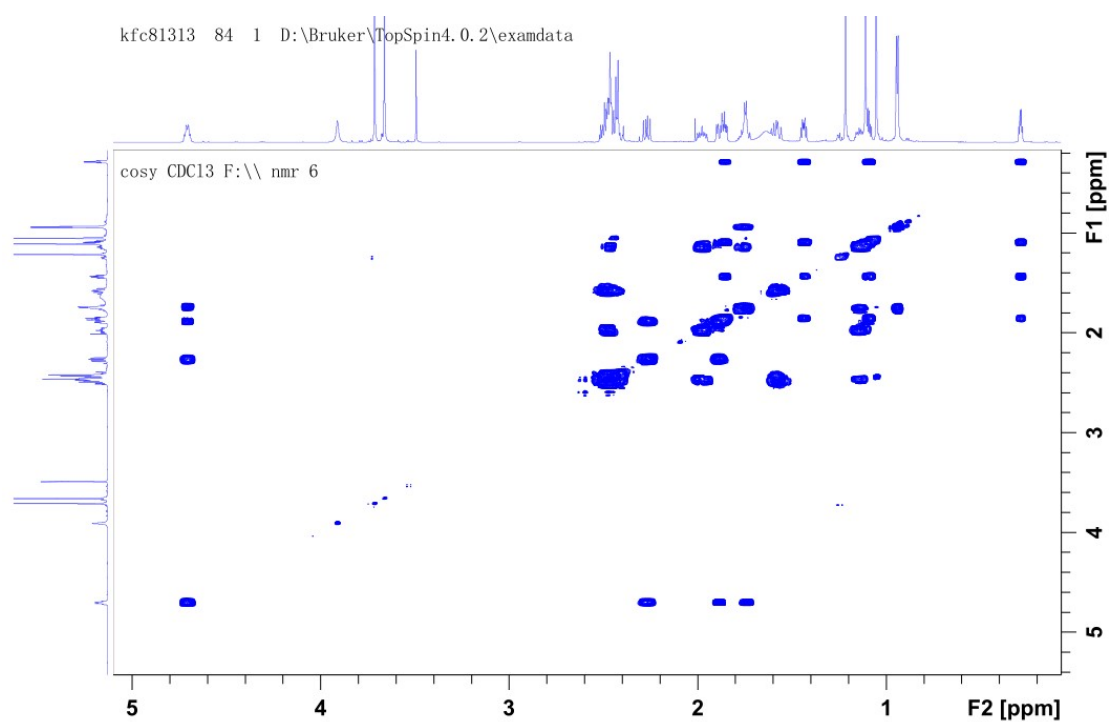

Figure S19. ROESY spectrum (150 MHz,  $\text{CDCl}_3$ ) of compound 2.

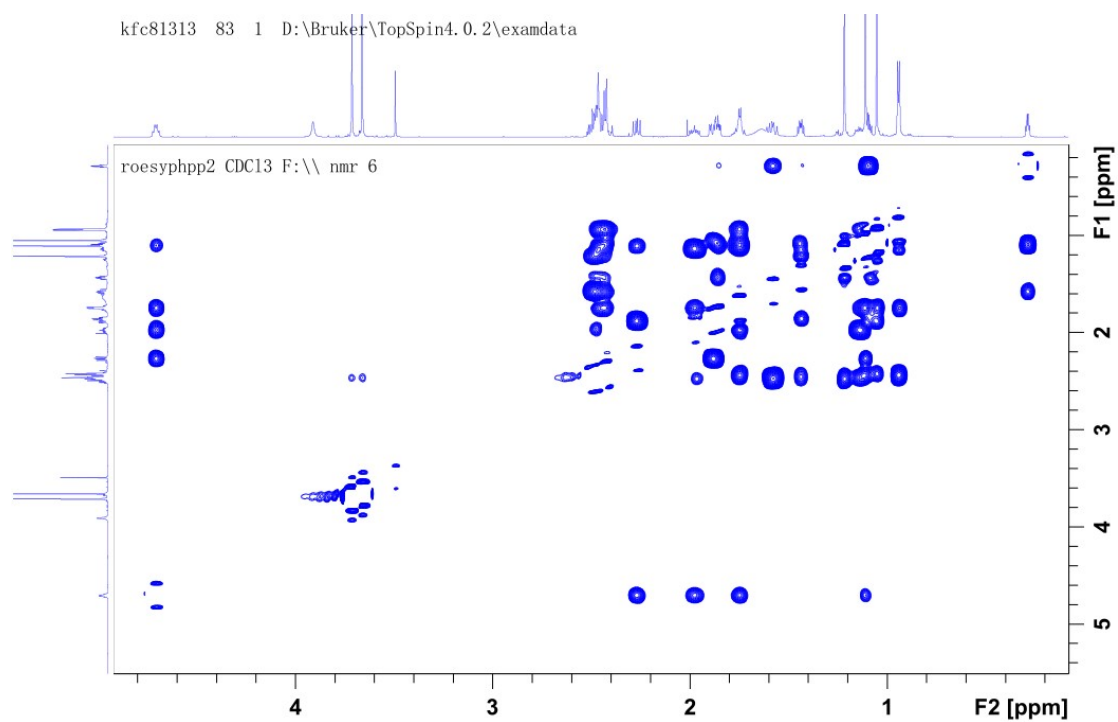



**Figure S22. HSQC spectrum (600/150 MHz, CDCl<sub>3</sub>) of compound 3.**

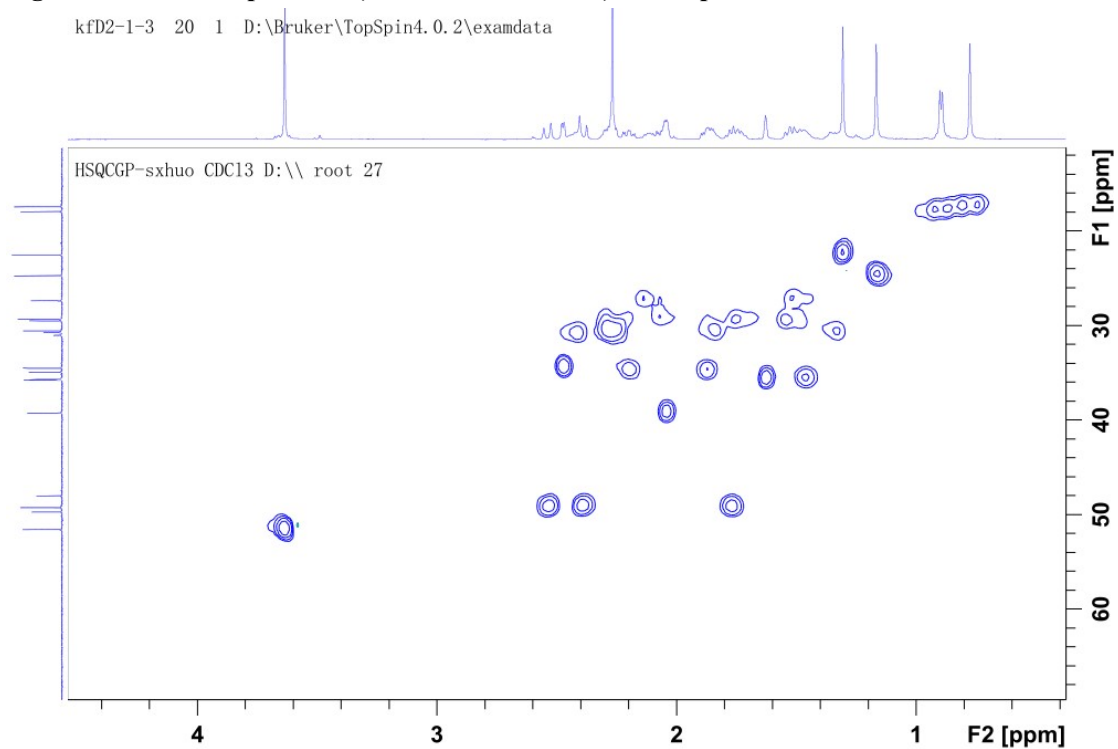

**Figure S23. HMBC spectrum (600/150 MHz, CDCl<sub>3</sub>) of compound 3.**

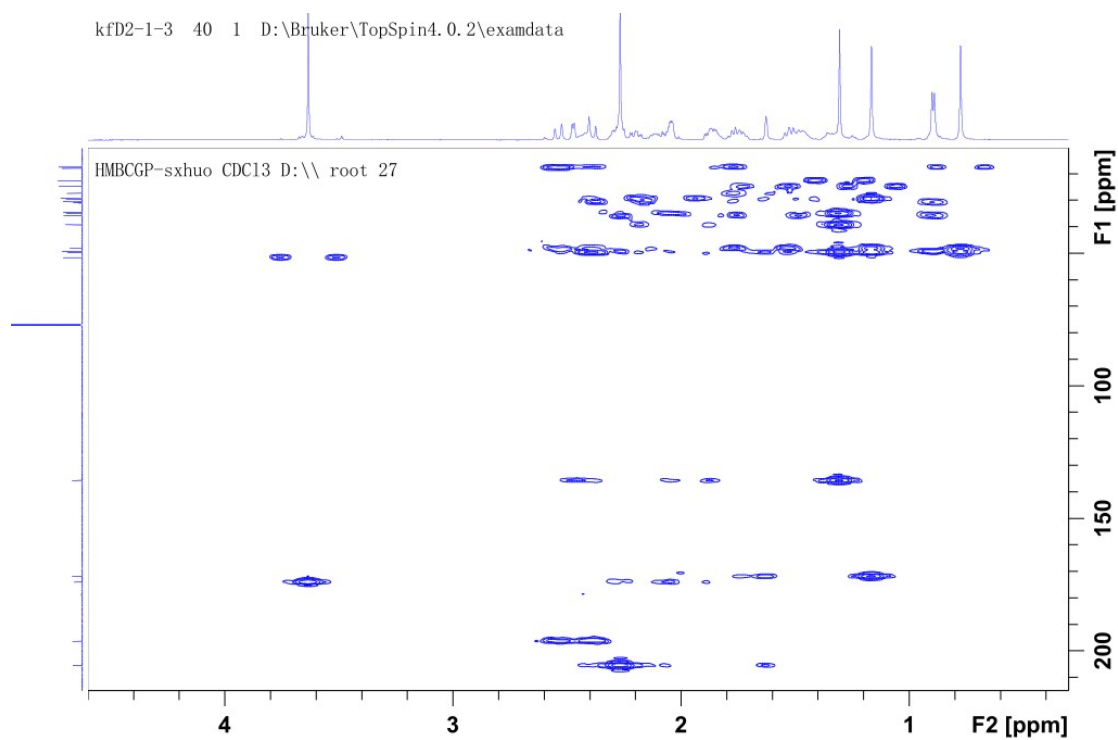

**Figure S24.  $^1\text{H}$ - $^1\text{H}$  COSY spectrum (600 MHz,  $\text{CDCl}_3$ ) of compound 3.**

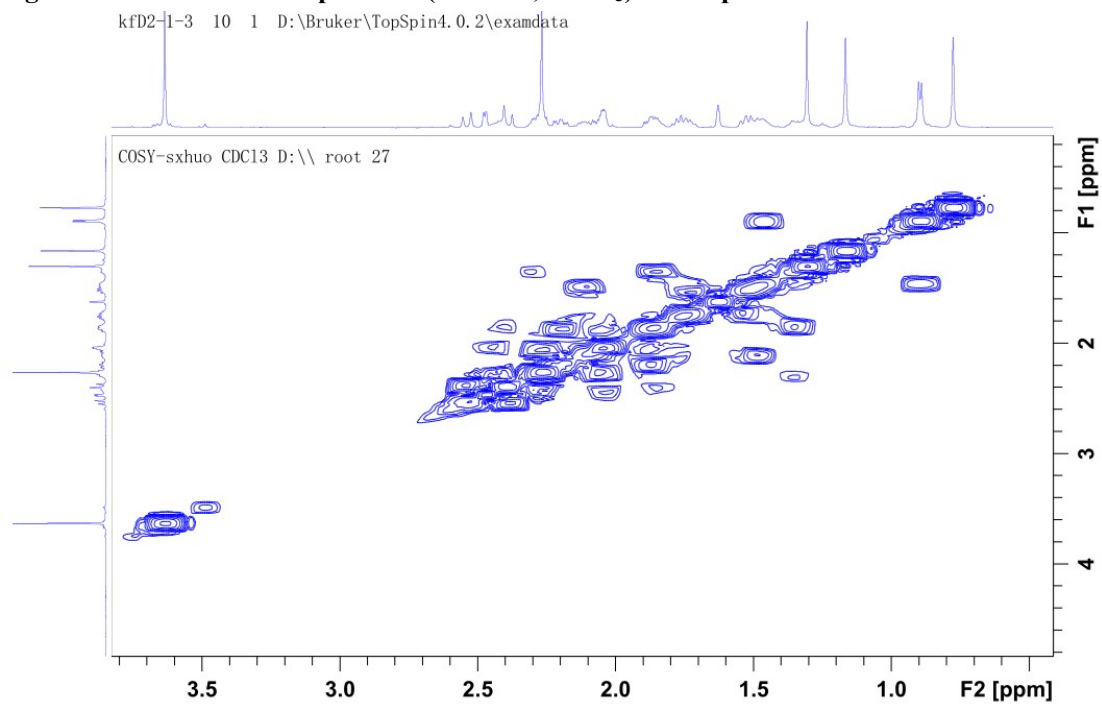

**Figure S25. ROESY spectrum (600 MHz,  $\text{CDCl}_3$ ) of compound 3.**

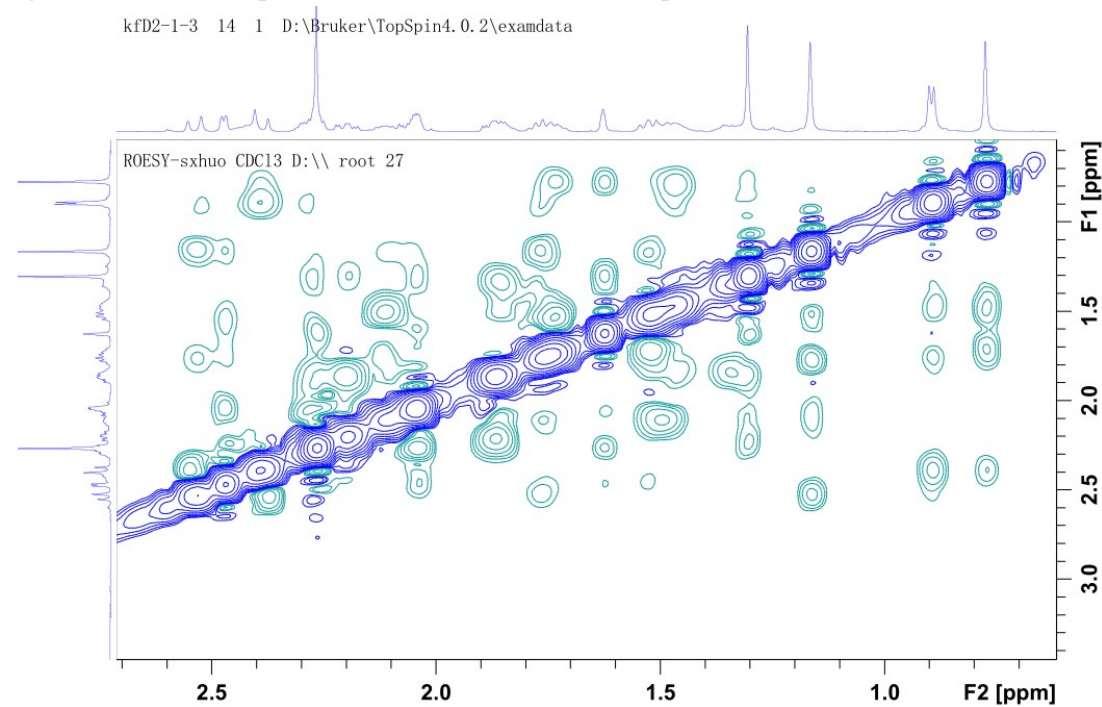

Figure S26.  $^1\text{H}$  NMR spectrum (600 MHz,  $\text{CDCl}_3$ ) of compound 4.

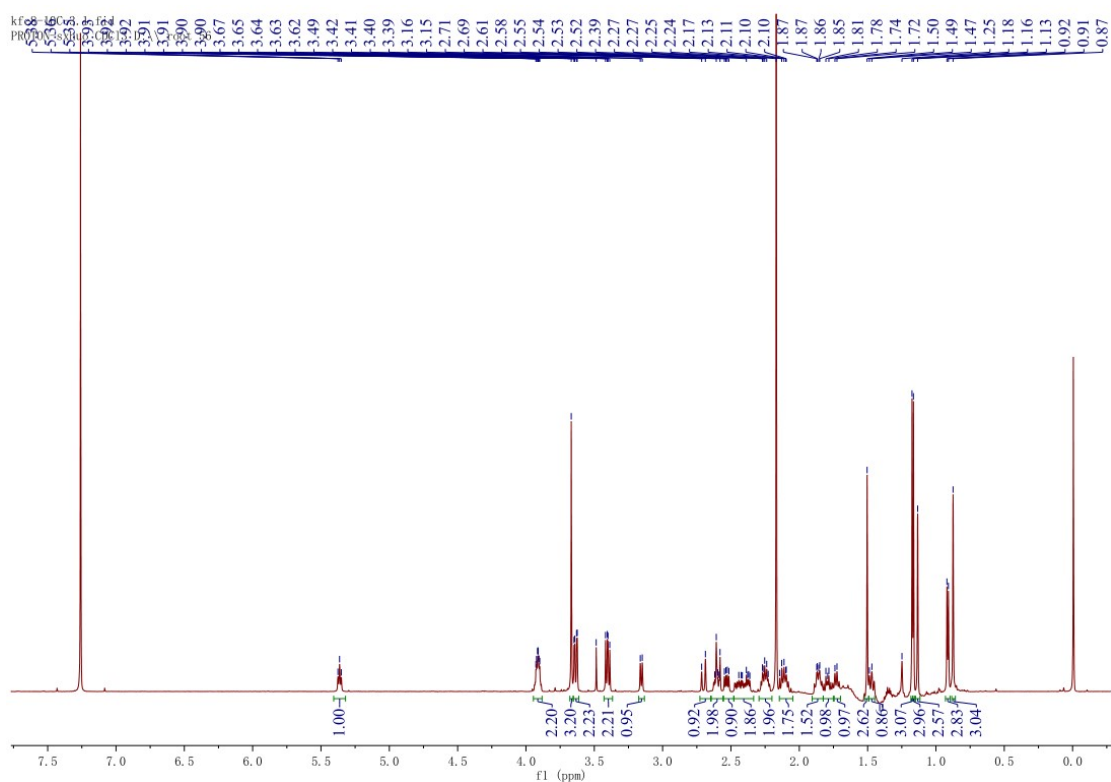

Figure S27.  $^{13}\text{C}$  NMR spectrum (150 MHz,  $\text{CDCl}_3$ ) of compound 4.

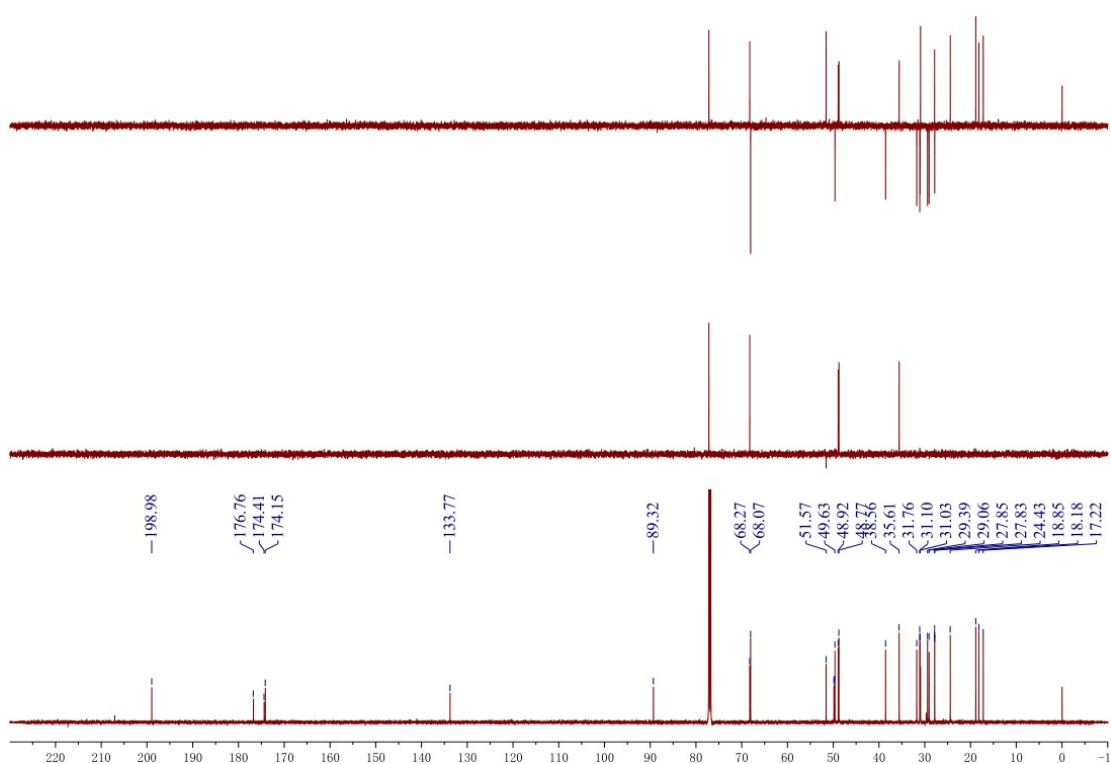

**Figure S28. HSQC spectrum (600/150 MH, CDCl<sub>3</sub>) of compound 4.**

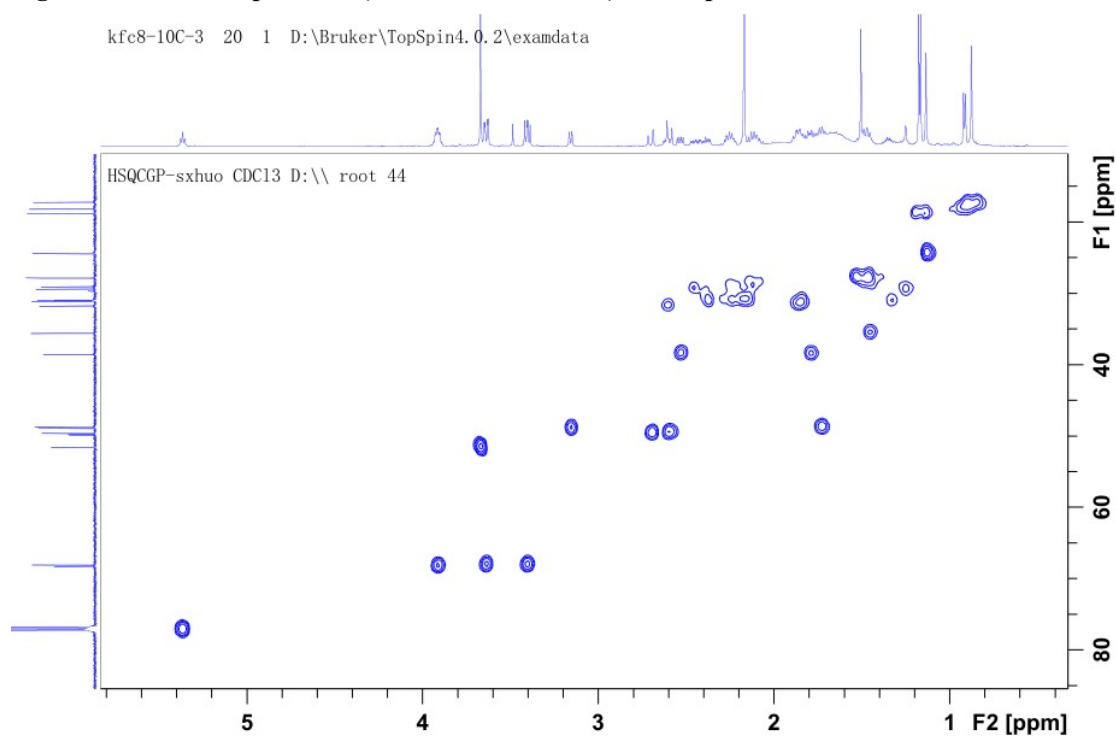

**Figure S29. HMBC spectrum (600/150 MH, CDCl<sub>3</sub>) of compound 4.**

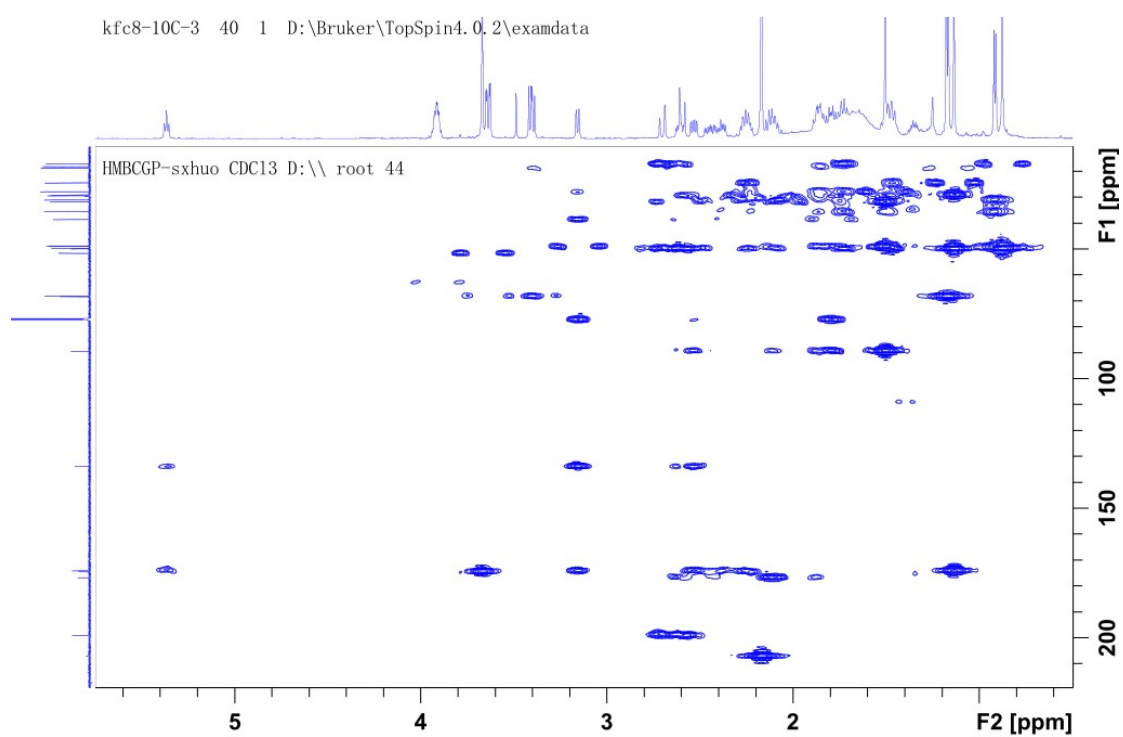

**Figure S30.  $^1\text{H}$ - $^1\text{H}$  COSY spectrum (600 MHz,  $\text{CDCl}_3$ ) of compound 4.**

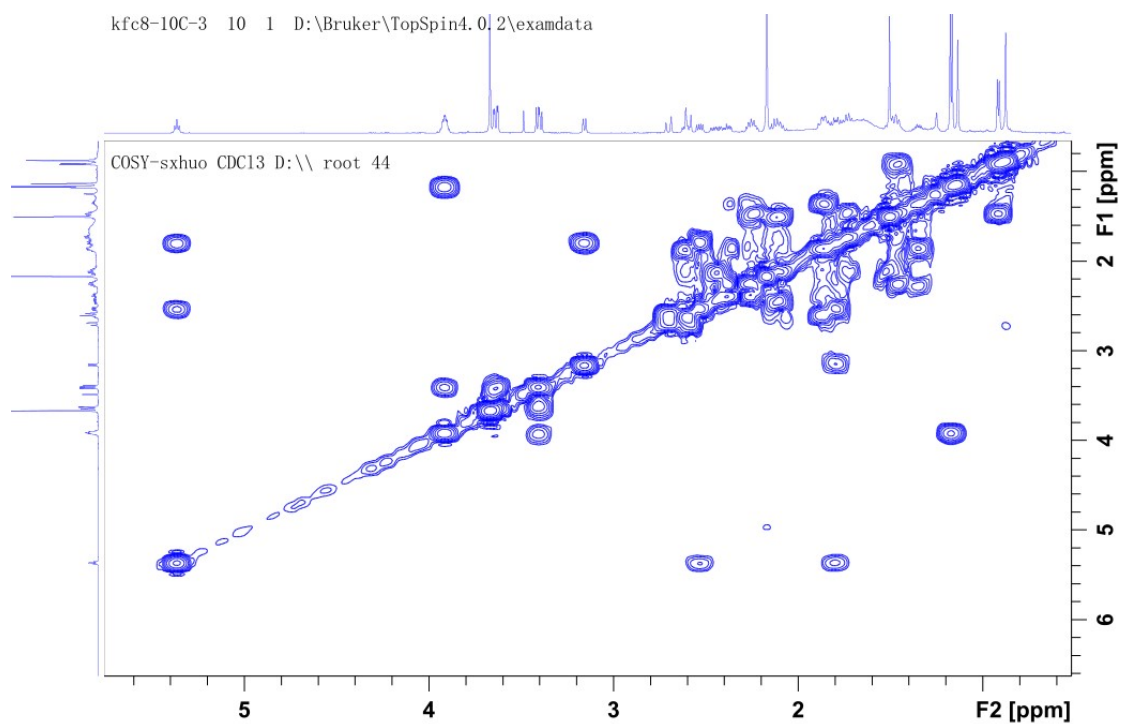

**Figure S31. ROESY spectrum (600 MHz,  $\text{CDCl}_3$ ) of compound 4.**

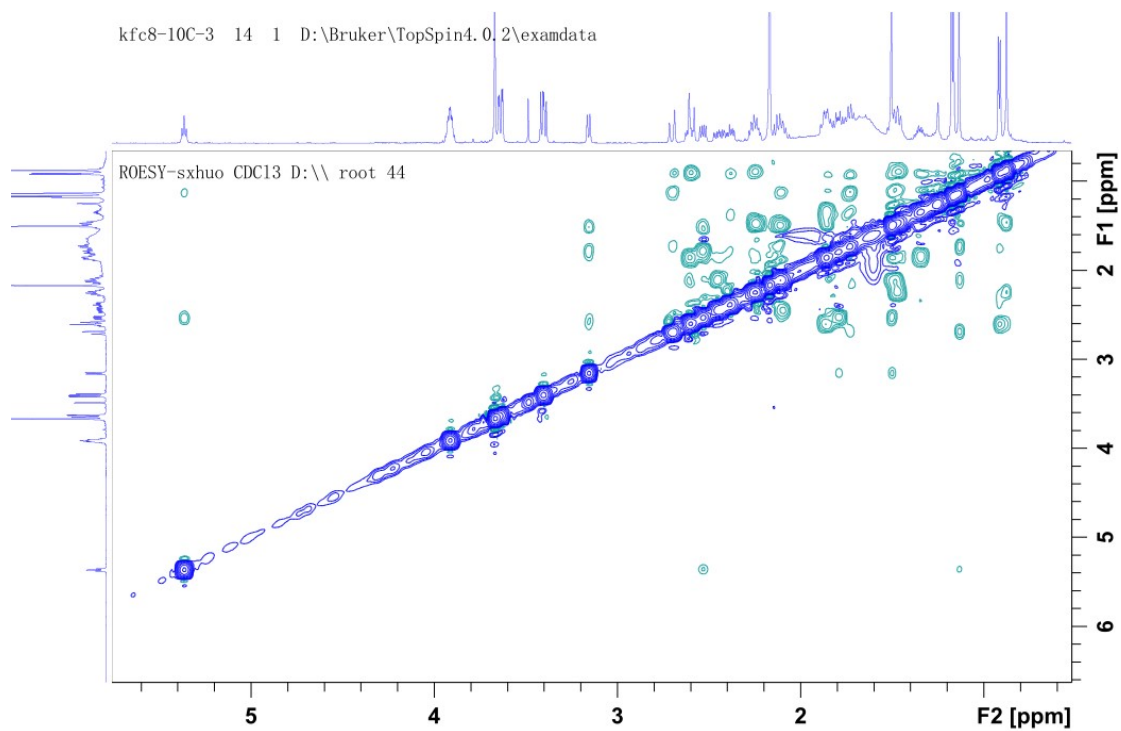



Figure S32. <sup>1</sup>H NMR spectrum (600 MHz, CDCl<sub>3</sub>) of compound 5.

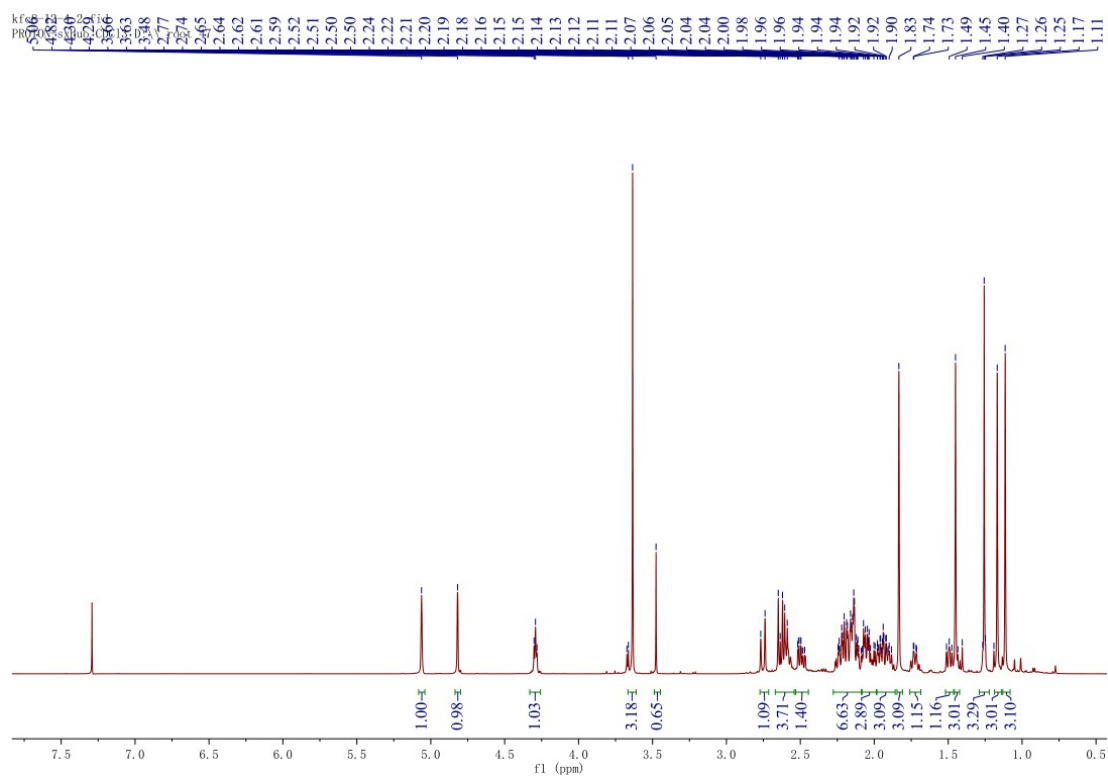

Figure S33. <sup>13</sup>C NMR spectrum (150 MHz, CDCl<sub>3</sub>) of compound 5.

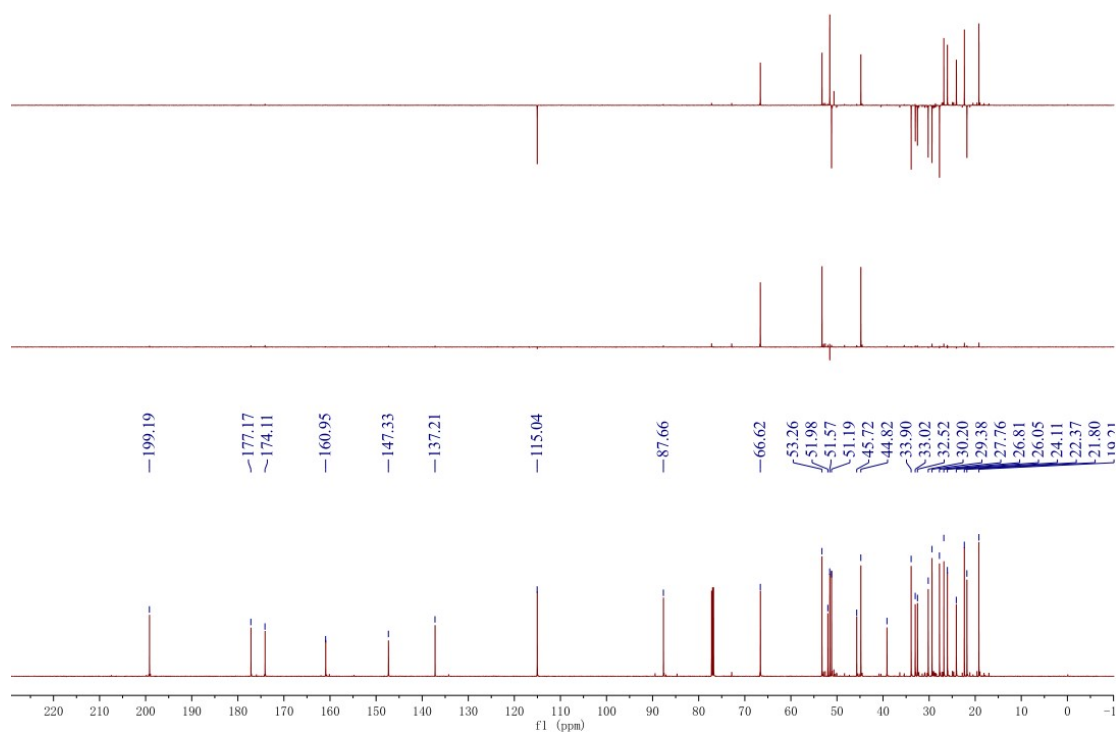

**Figure S34. HSQC NMR spectrum (600/150 MHz, CDCl<sub>3</sub>) of compound 5.**

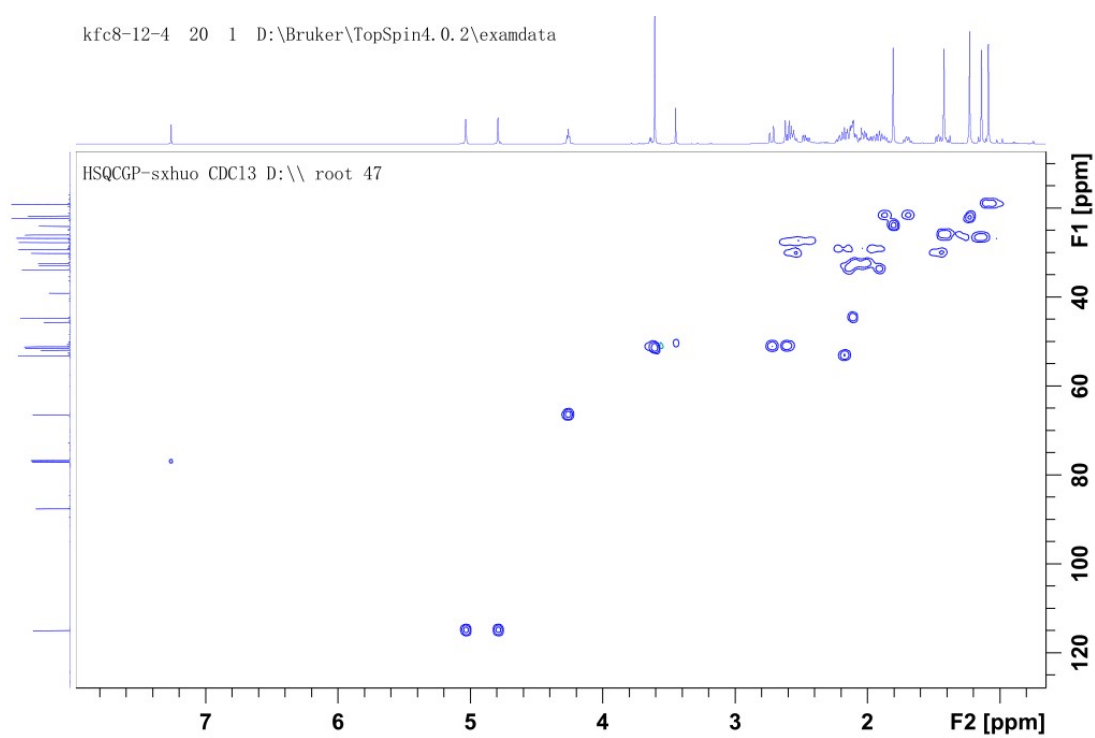

**Figure S35. HMBC spectrum (600/150 MHz, CDCl<sub>3</sub>) of compound 5.**

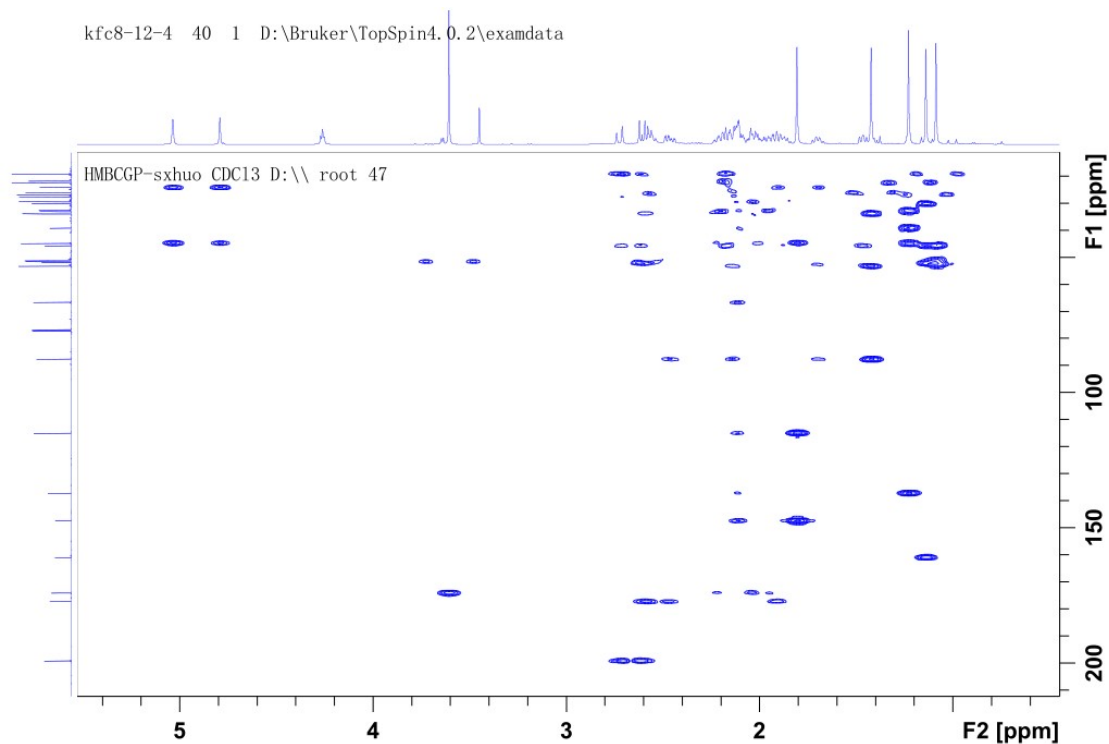

Figure S36.  $^1\text{H}$ - $^1\text{H}$  COSY spectrum (600 MHz,  $\text{CDCl}_3$ ) of compound 5.

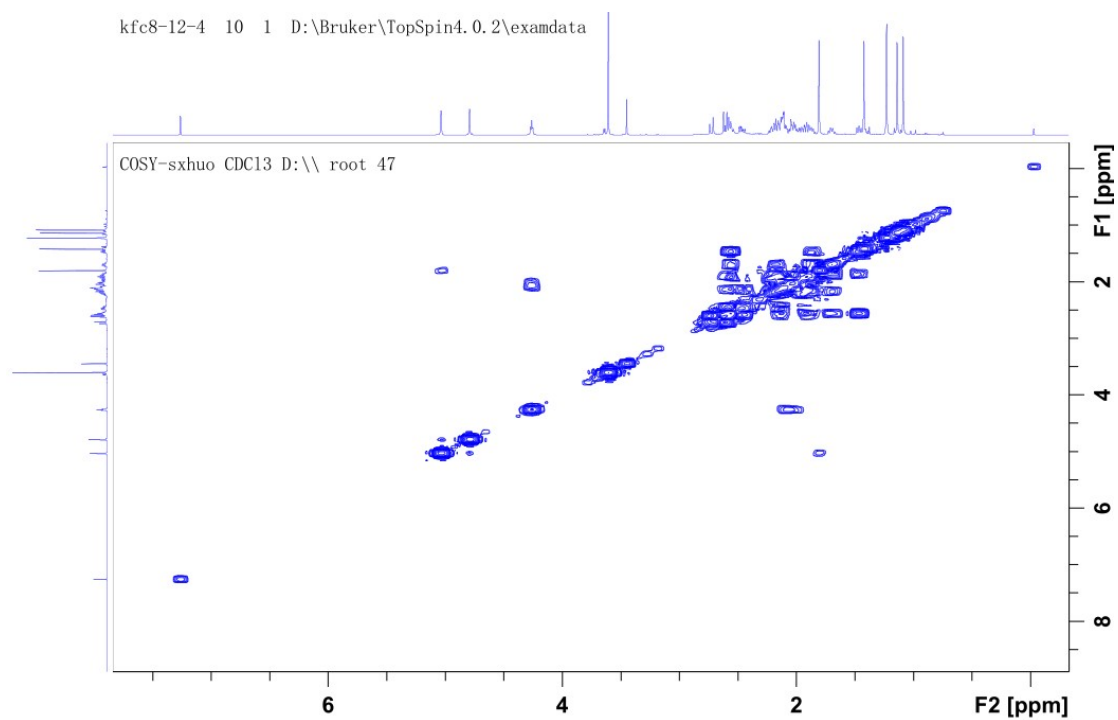

Figure S37. ROESY spectrum (600 MHz,  $\text{CDCl}_3$ ) of compound 5.

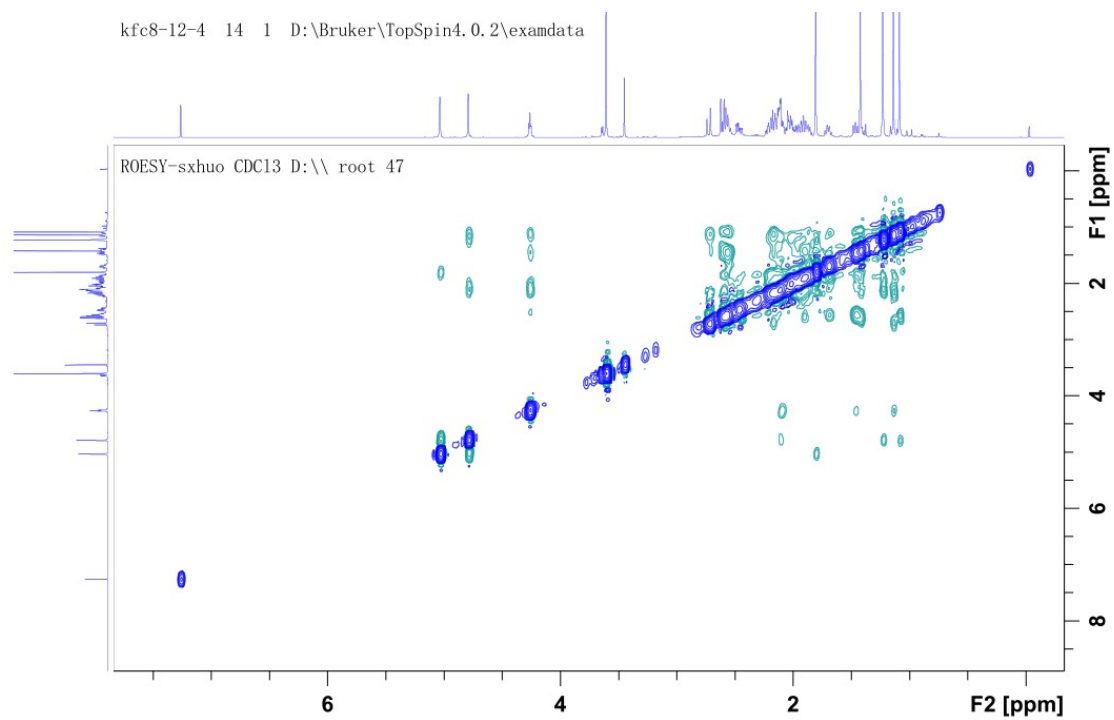

Figure S38.  $^1\text{H}$  NMR spectrum (600 MHz,  $\text{CD}_3\text{OD}$ ) of compound 6.

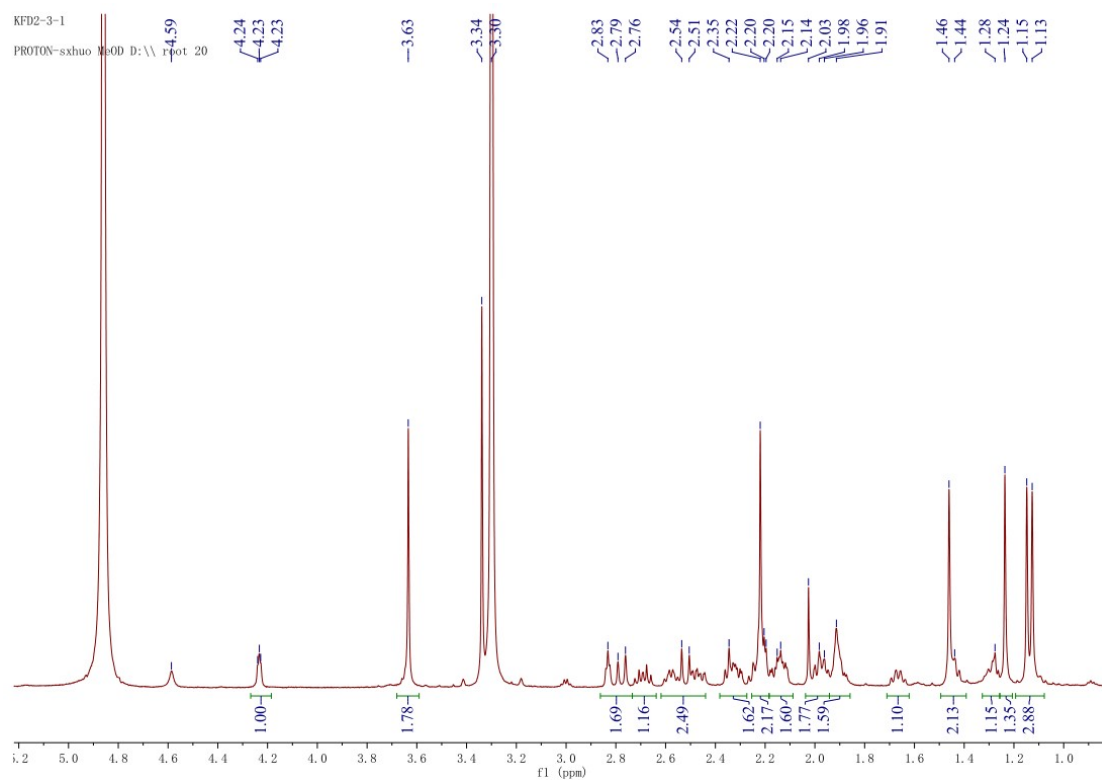

Figure S39.  $^{13}\text{C}$  NMR spectrum (150 MHz,  $\text{CD}_3\text{OD}$ ) of compound 6.

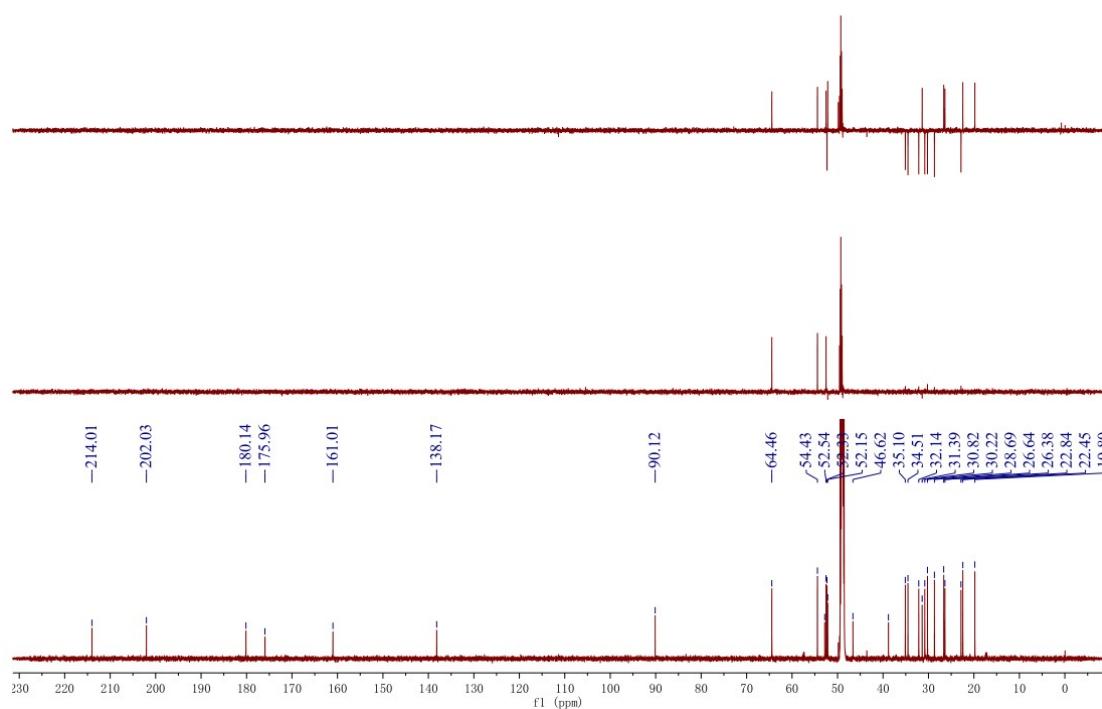

**Figure S40. HSQC spectrum (600/150 MHz, CD<sub>3</sub>OD) of compound 6.**

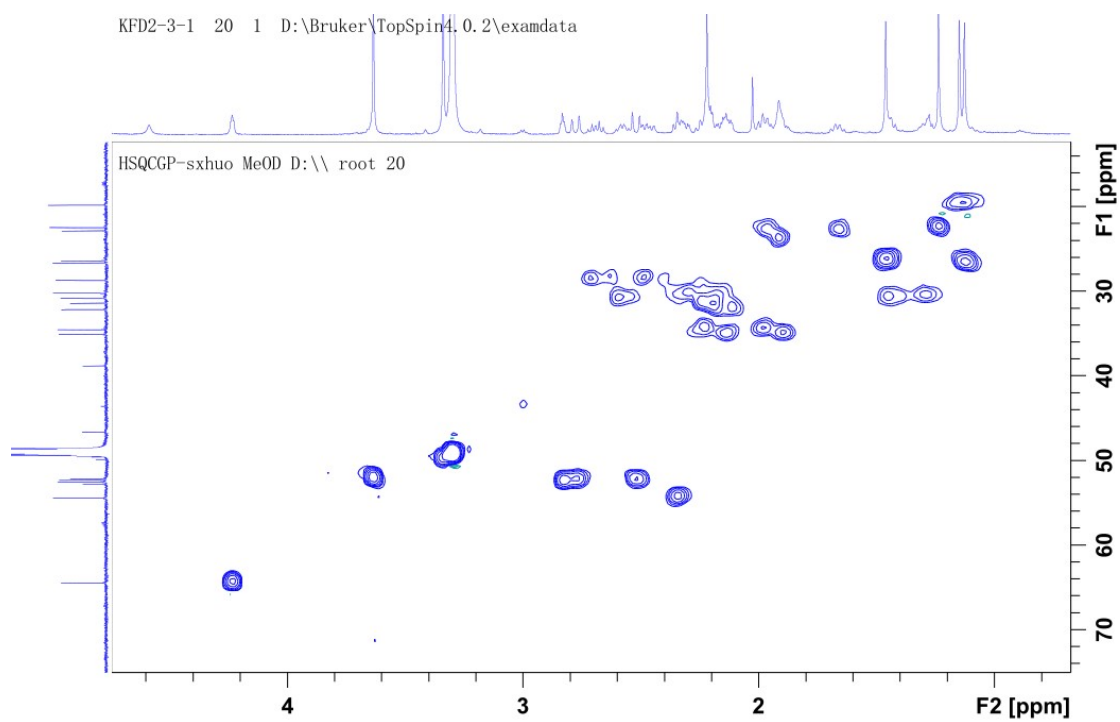

**Figure S41. HMBC spectrum (600/150 MHz, CD<sub>3</sub>OD) of compound 6.**

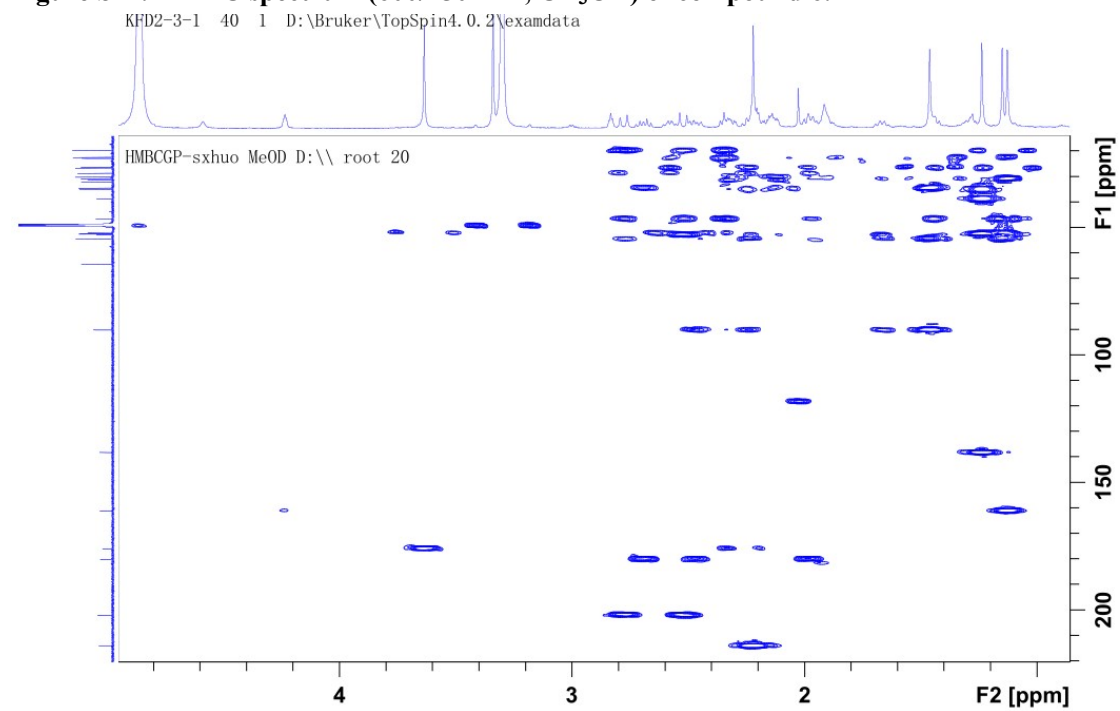

Figure S42.  $^1\text{H}$ - $^1\text{H}$  COSY spectrum (600 MHz,  $\text{CD}_3\text{OD}$ ) of compound 6.

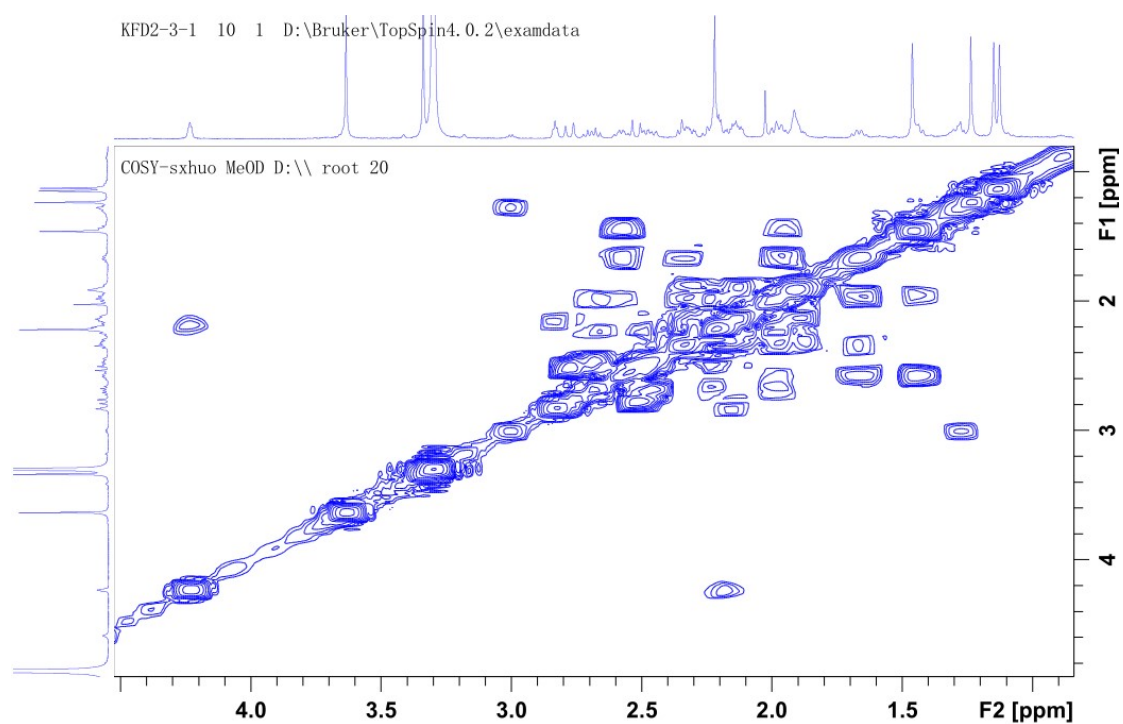

Figure S43.  $^1\text{H}$  NMR spectrum (600 MHz,  $\text{CDCl}_3$ ) of compound 7.

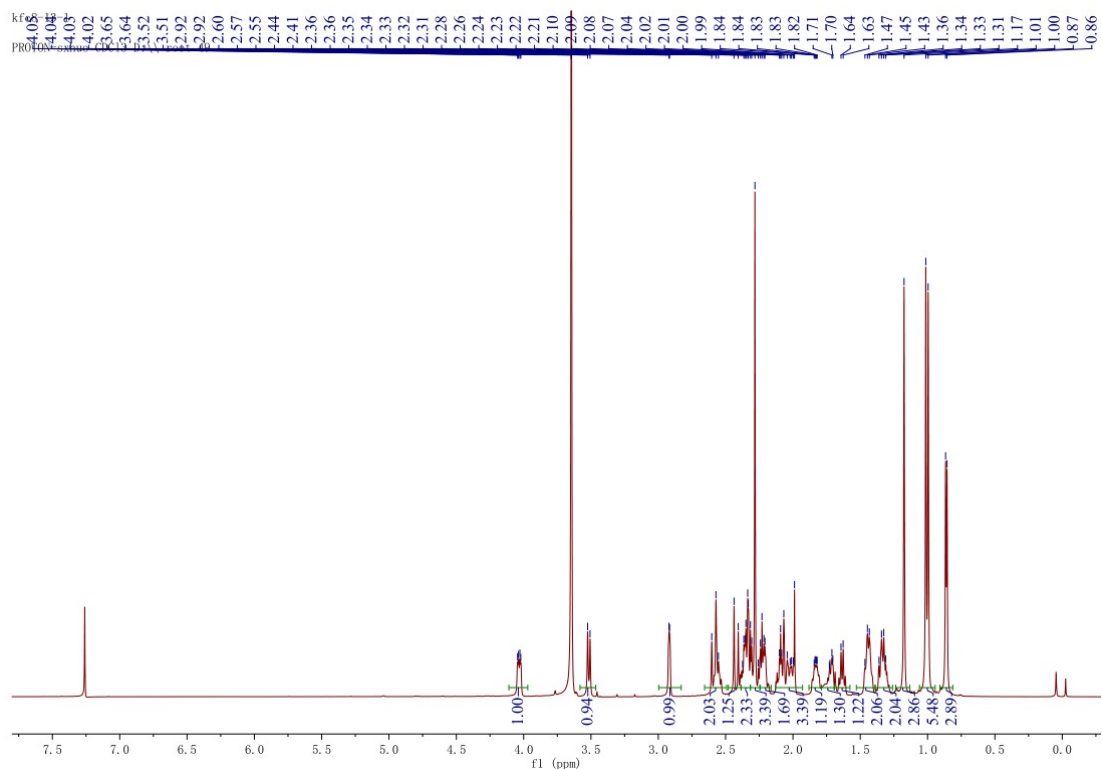

Figure S44.  $^{13}\text{C}$  NMR spectrum (150 MHz,  $\text{CDCl}_3$ ) of compound 7.

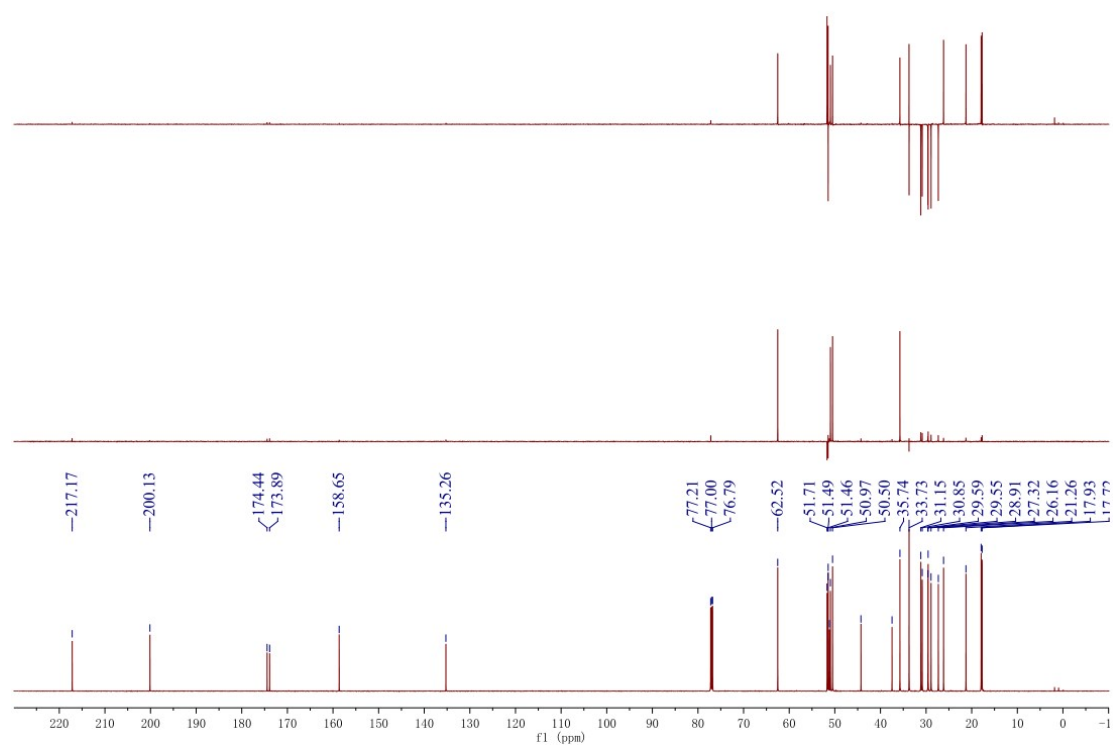

Figure S45. HSQC spectrum (600/150 MHz,  $\text{CDCl}_3$ ) of compound 7.

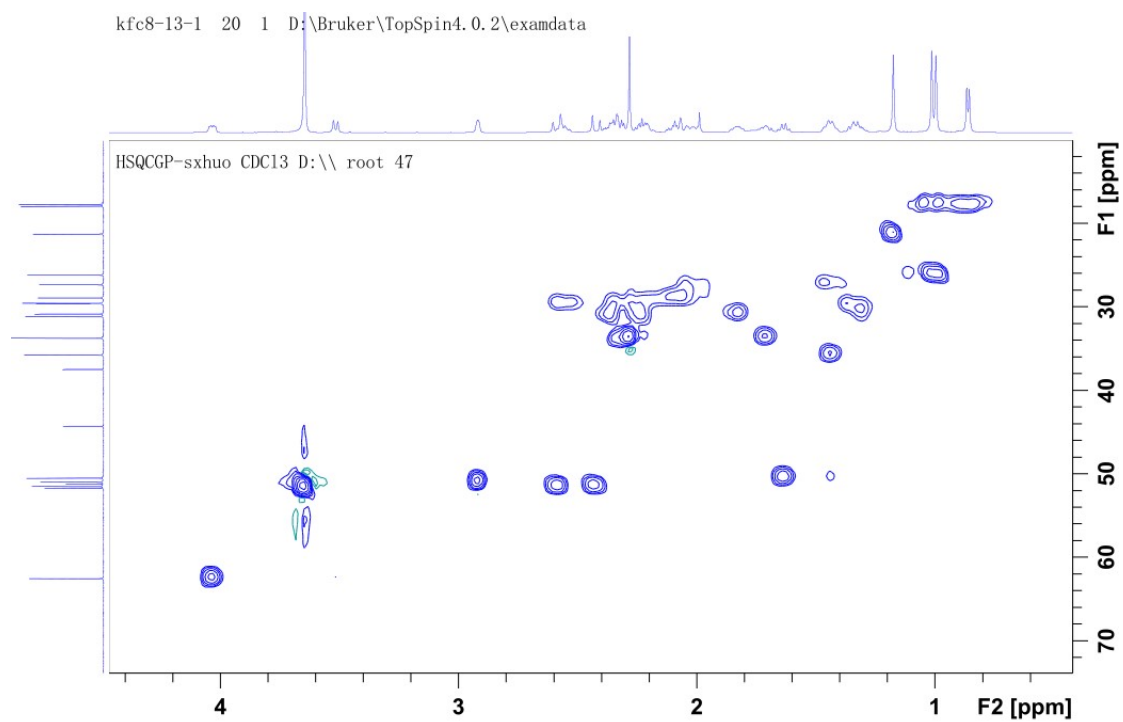

**Figure S46. HMBC spectrum (600/150 MHz, CDCl<sub>3</sub>) of compound 7.**

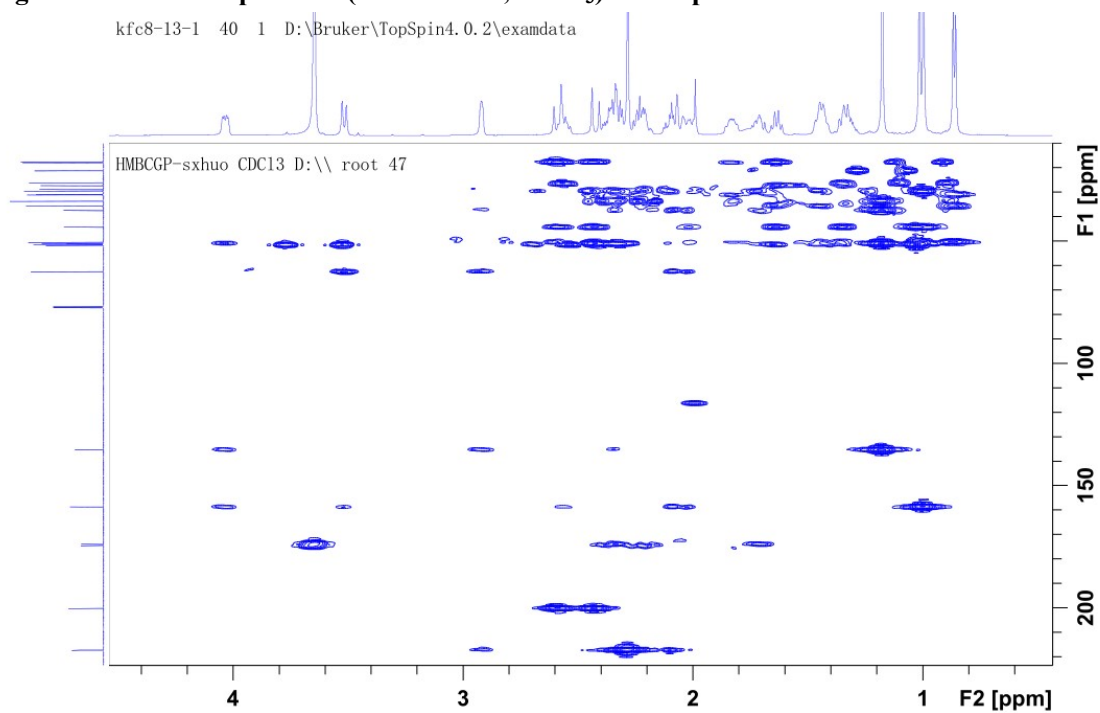

**Figure S47. <sup>1</sup>H-<sup>1</sup>H COSY spectrum (600 MHz, CDCl<sub>3</sub>) of compound 7.**

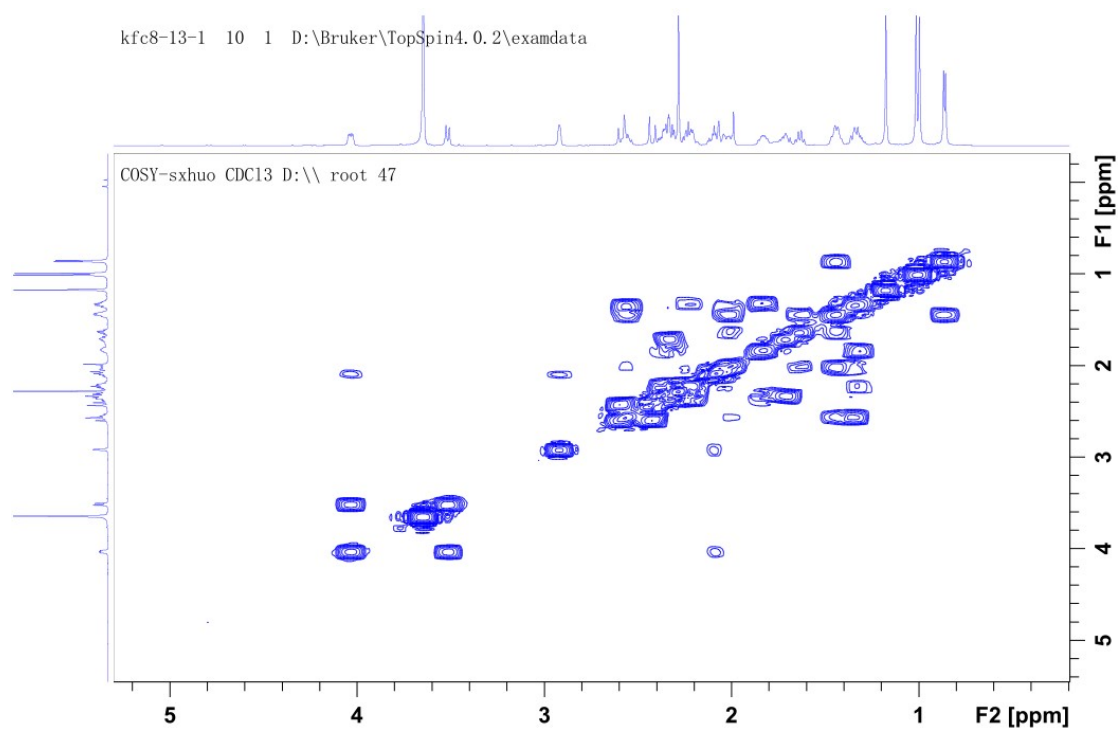



Figure S48. ROESY spectrum (600 MHz, CDCl<sub>3</sub>) of compound 7.

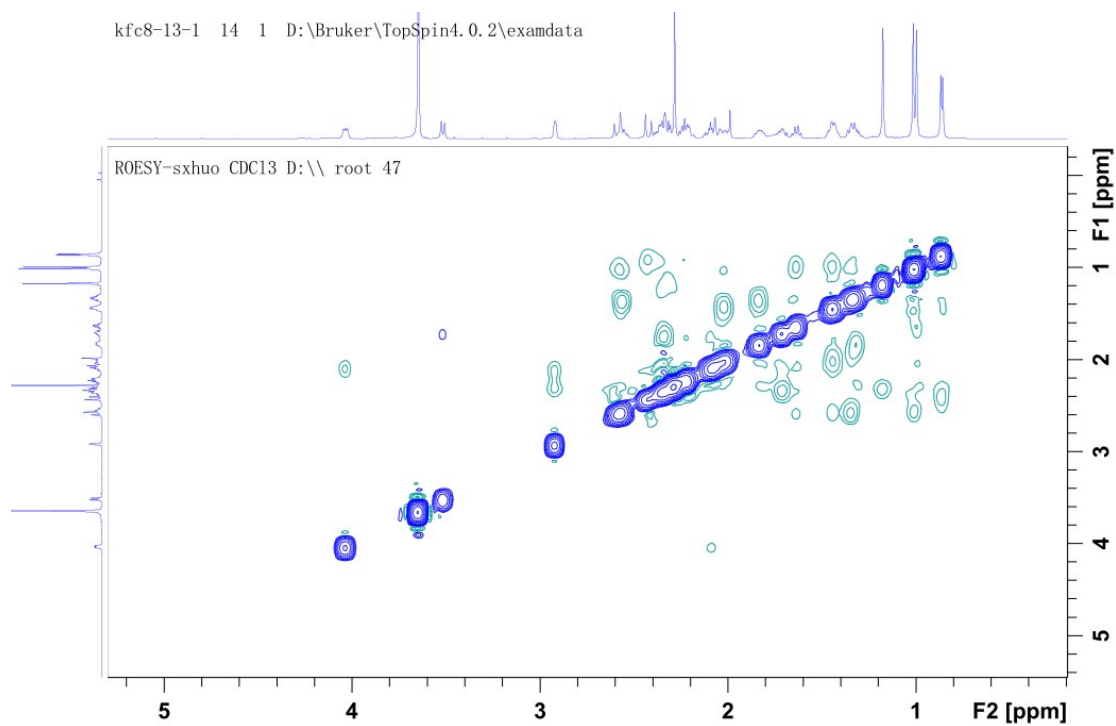

Figure S49. <sup>1</sup>H NMR spectrum (600 MHz, CDCl<sub>3</sub>) of compound 8.

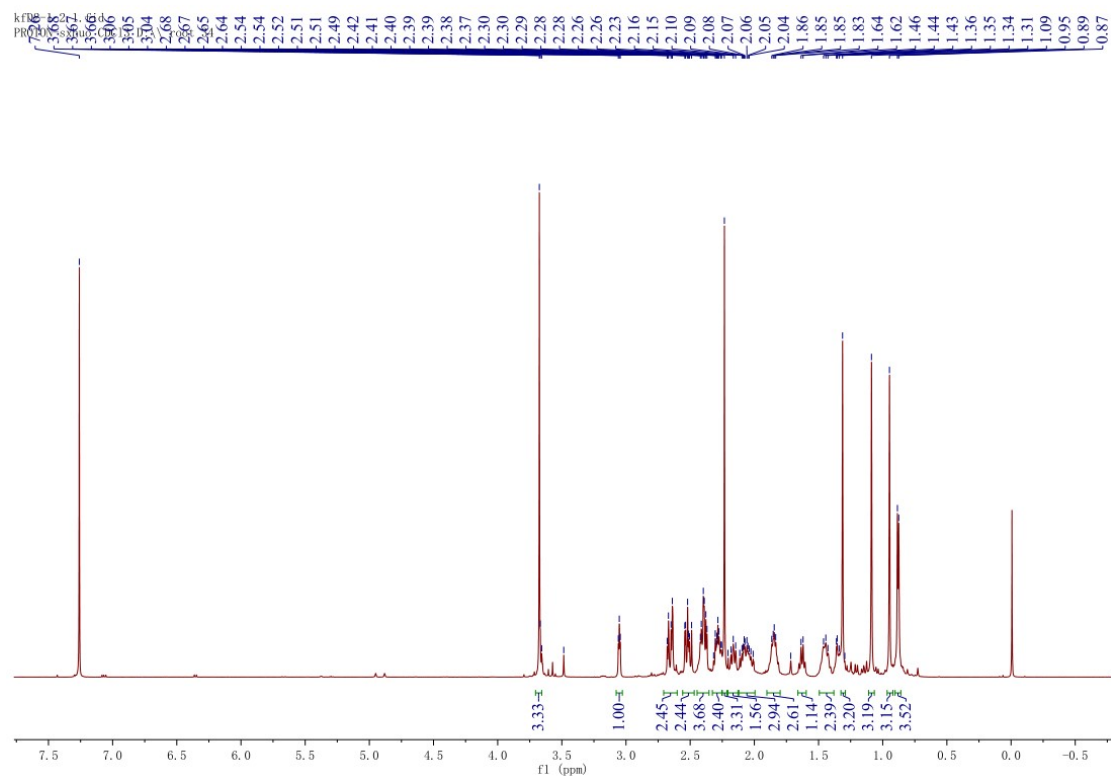

Figure S50.  $^{13}\text{C}$  NMR spectrum (150 MHz,  $\text{CDCl}_3$ ) of compound 8.

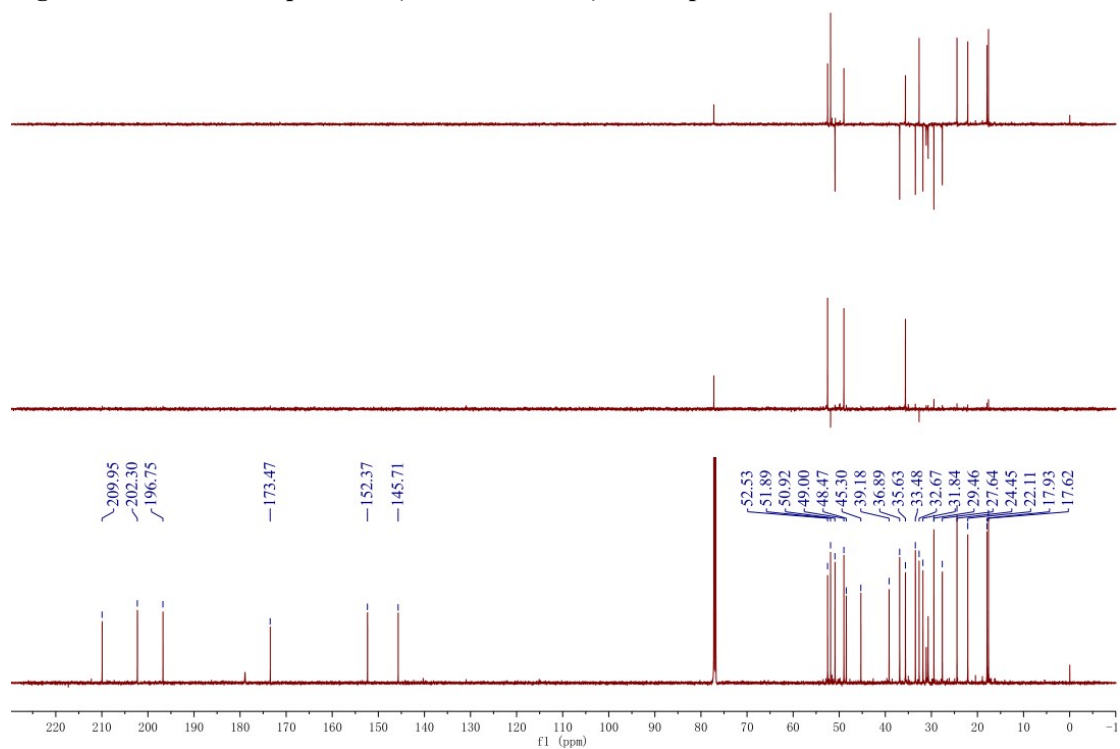

Figure S51. HSQC spectrum (600/150 MHz,  $\text{CDCl}_3$ ) of compound 8.

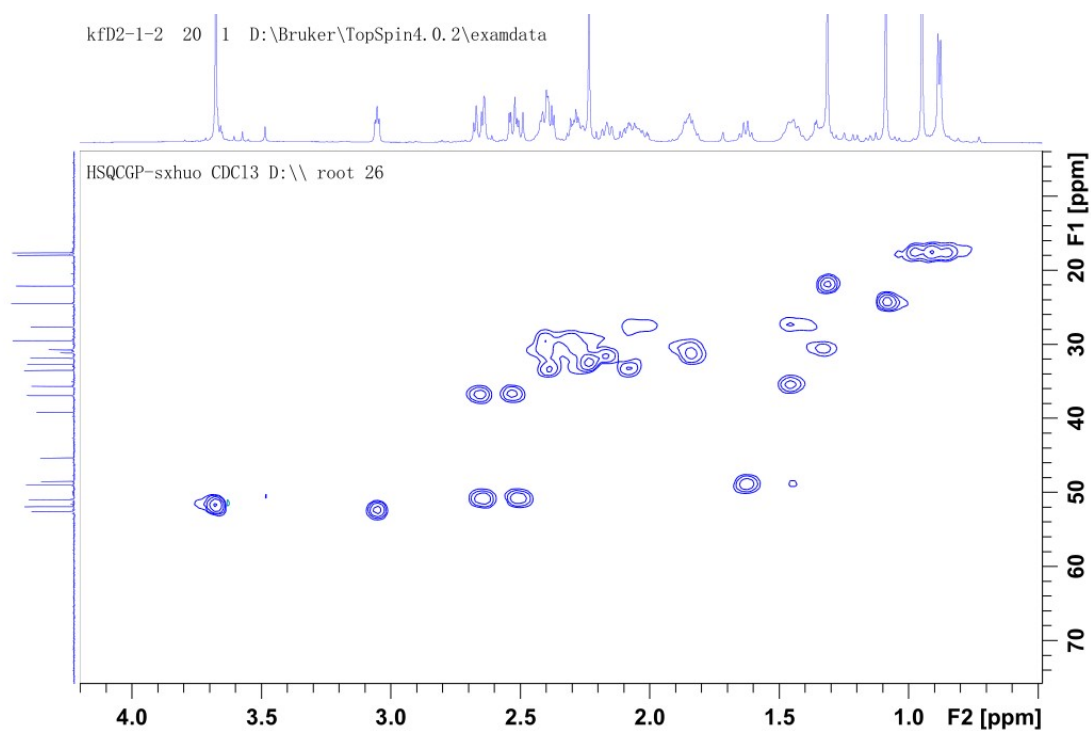

**Figure S52. HMBC spectrum (600/150 MHz, CDCl<sub>3</sub>) of compound 8.**

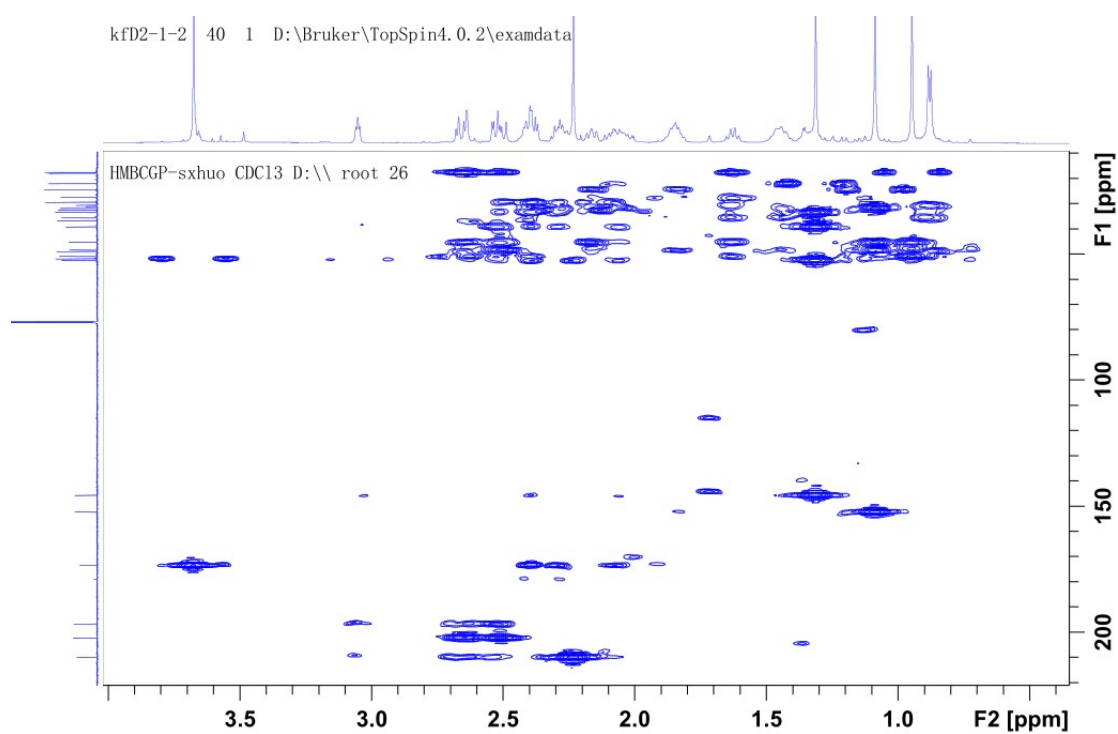

**Figure S53. <sup>1</sup>H-<sup>1</sup>H COSY spectrum (600 MHz, CDCl<sub>3</sub>) of compound 8.**

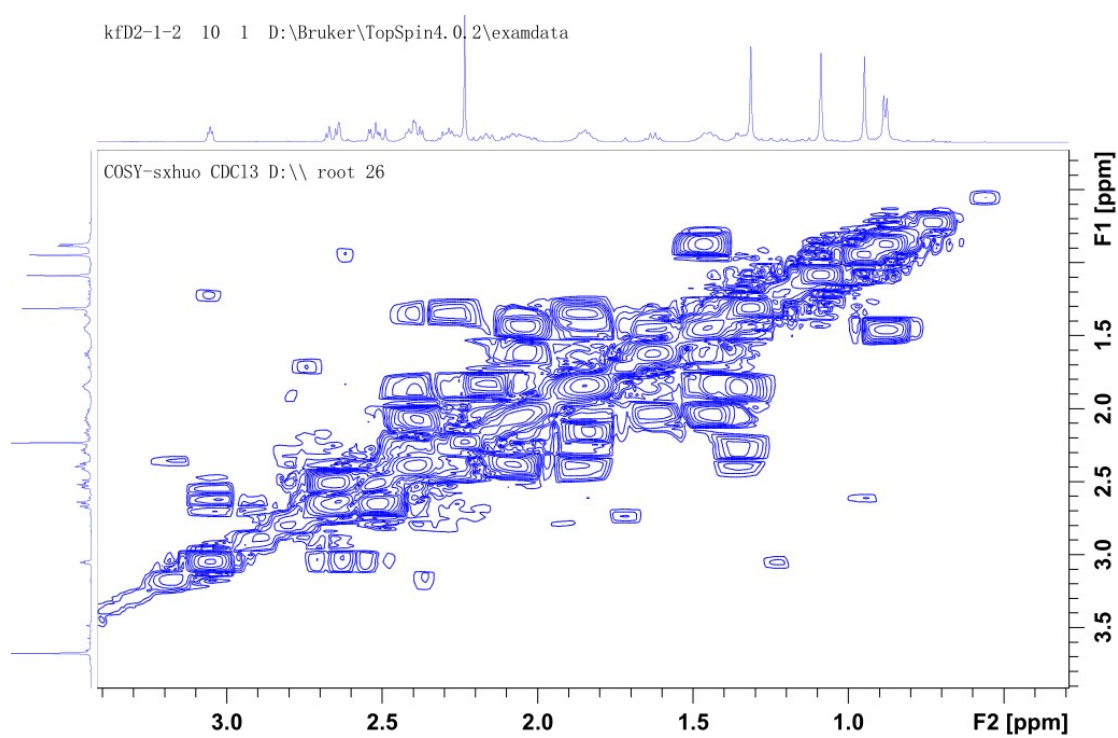

**Figure S54. ROESY spectrum (600 MHz, CDCl<sub>3</sub>) of compound 8.**

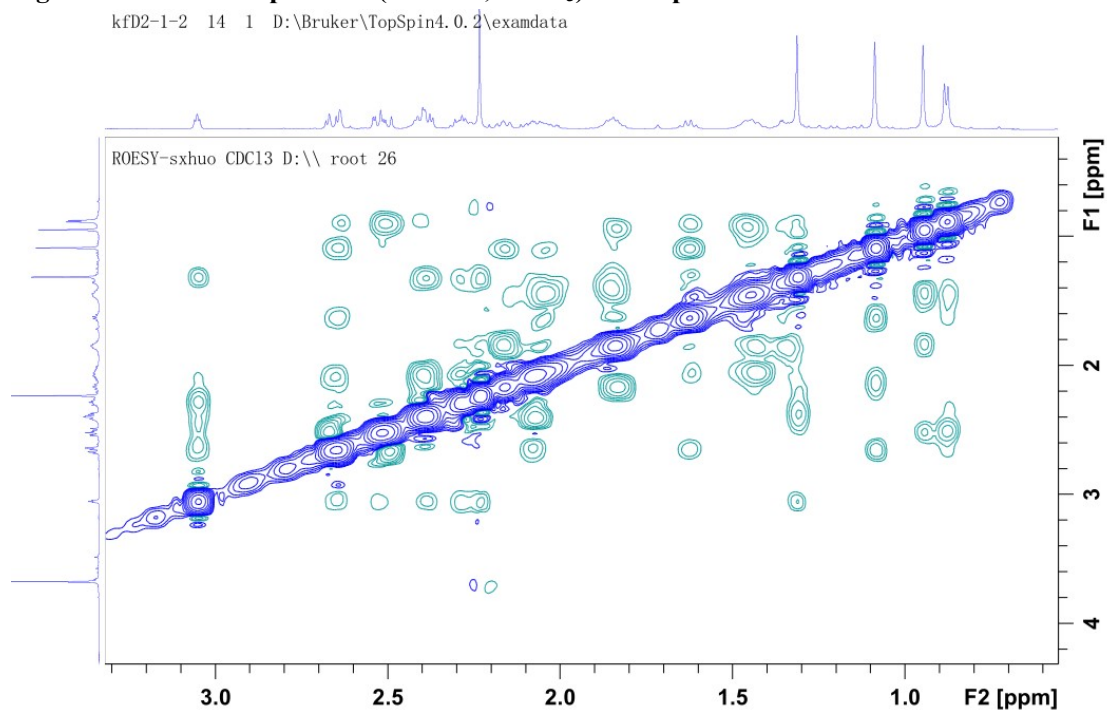

**Figure S55. <sup>1</sup>H NMR spectrum (600 MHz, CDCl<sub>3</sub>) of compound 9.**

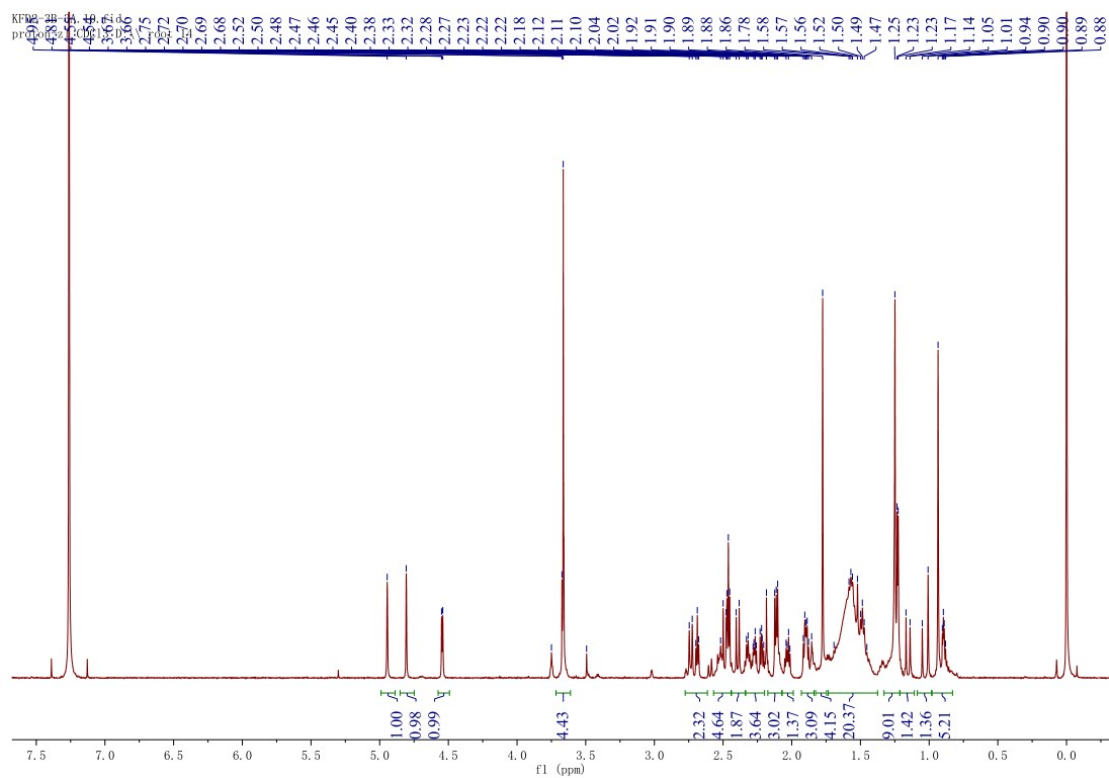

Figure S56.  $^{13}\text{C}$  NMR spectrum (150 MHz,  $\text{CDCl}_3$ ) of compound 9.

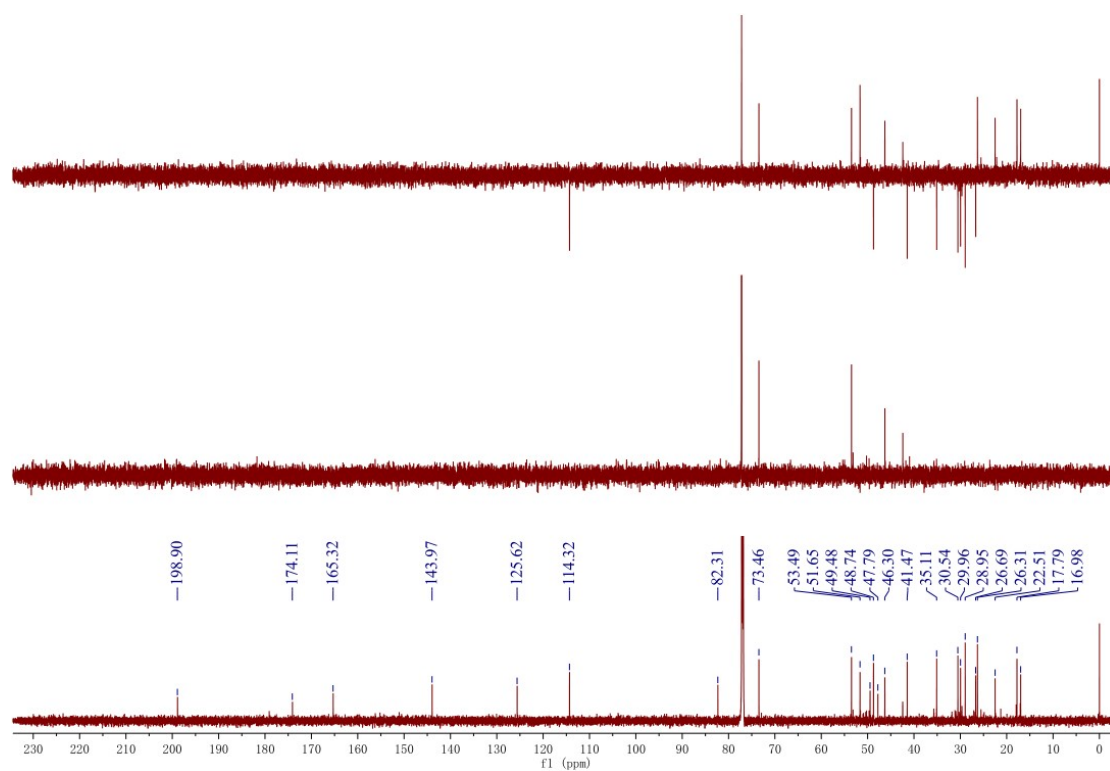

Figure S57. HSQC spectrum (600/150 MHz,  $\text{CDCl}_3$ ) of compound 9.

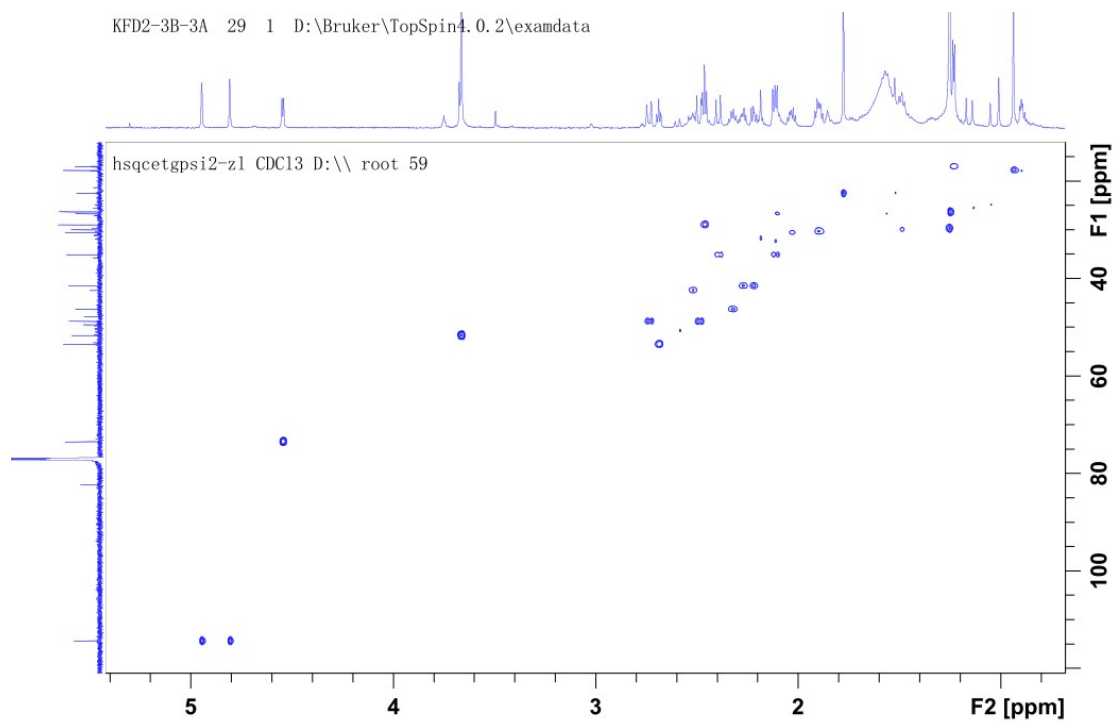

**Figure S58. HMBC spectrum (600/150 MHz, CDCl<sub>3</sub>) of compound 9.**

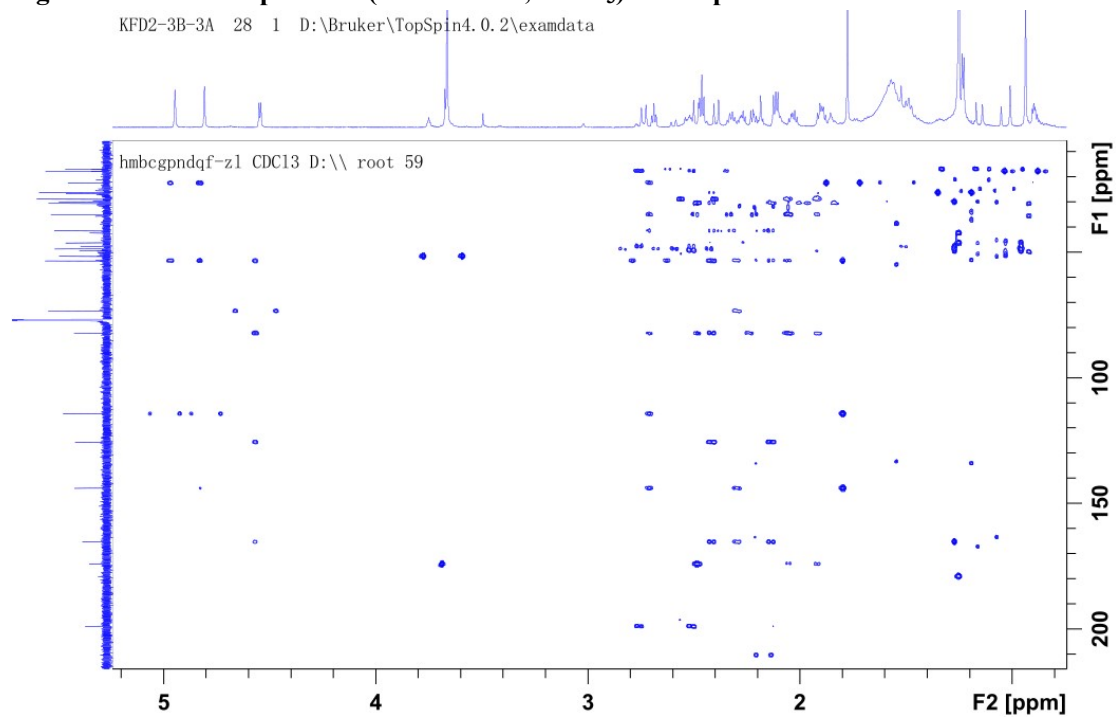

**Figure S59. <sup>1</sup>H-<sup>1</sup>H COSY spectrum (600 MHz, CDCl<sub>3</sub>) of compound 9.**

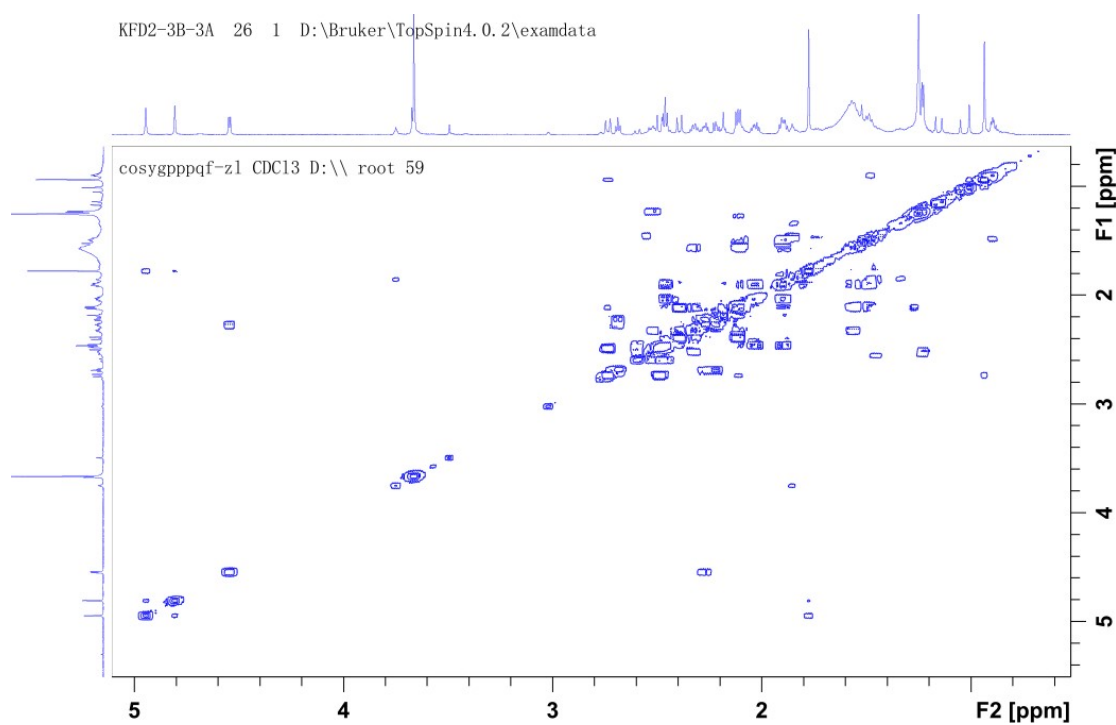

**Figure S60. ROESY spectrum (600 MHz, CDCl<sub>3</sub>) of compound 9.**

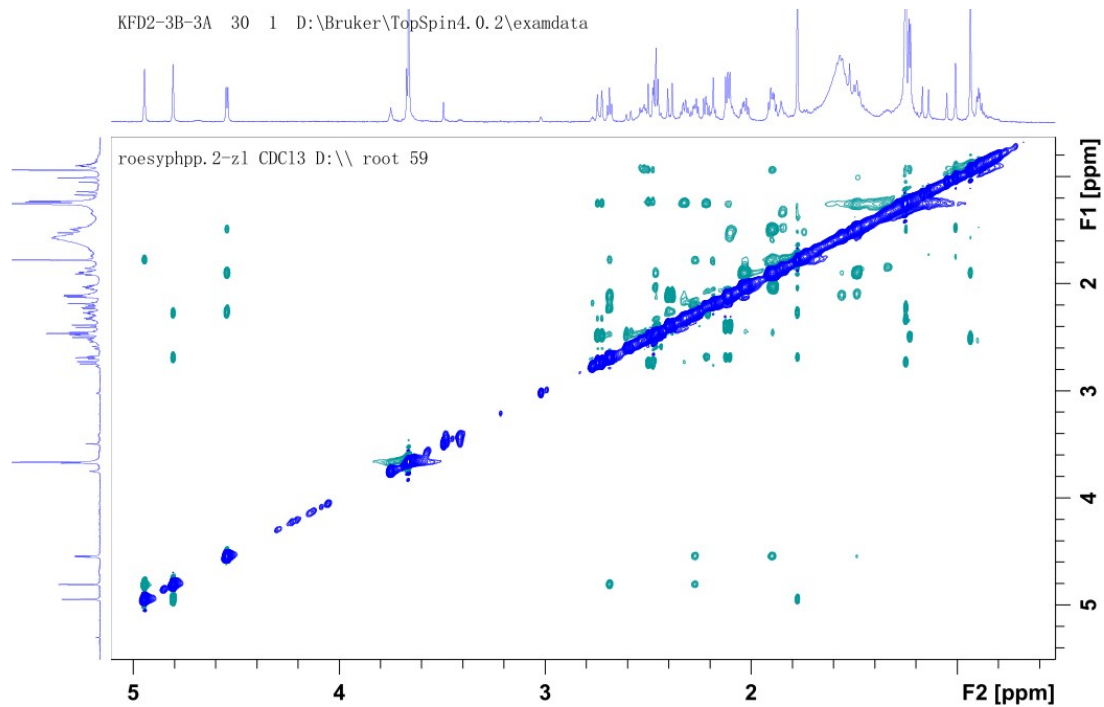

**Figure S61. <sup>1</sup>H NMR spectrum (600 MHz, CDCl<sub>3</sub>) of compound 10.**

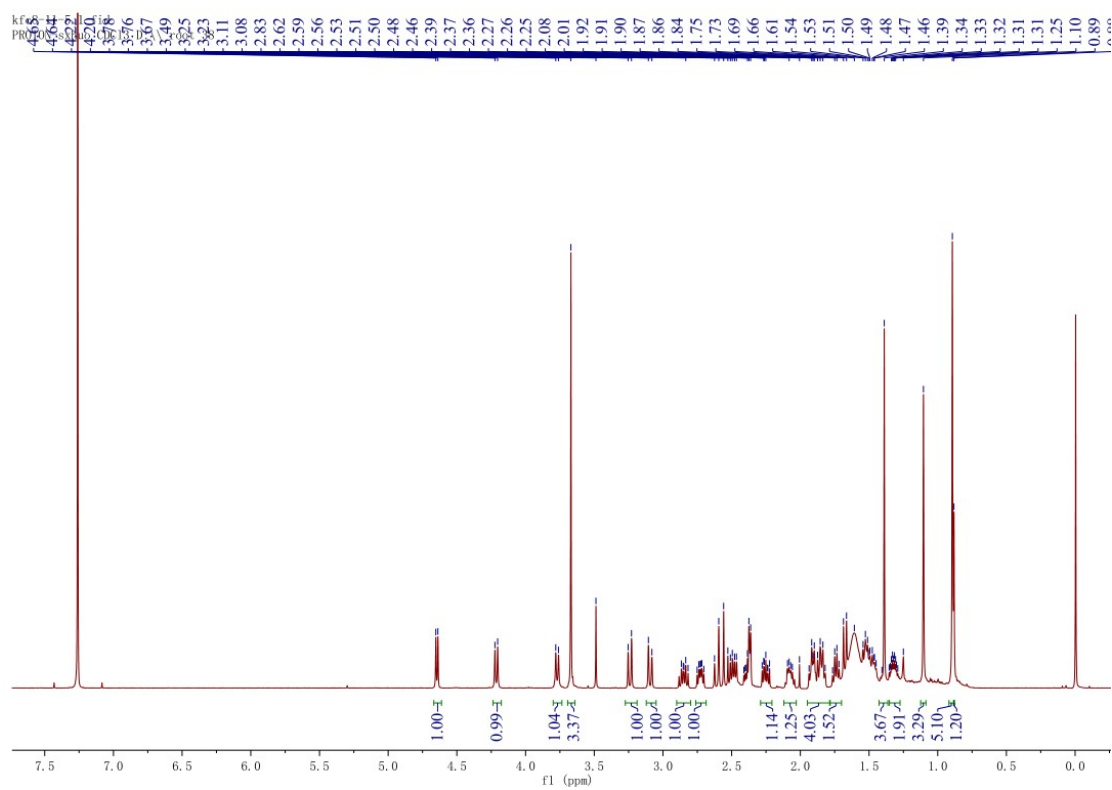

Figure S62.  $^{13}\text{C}$  NMR spectrum (150 MHz,  $\text{CDCl}_3$ ) of compound 10.

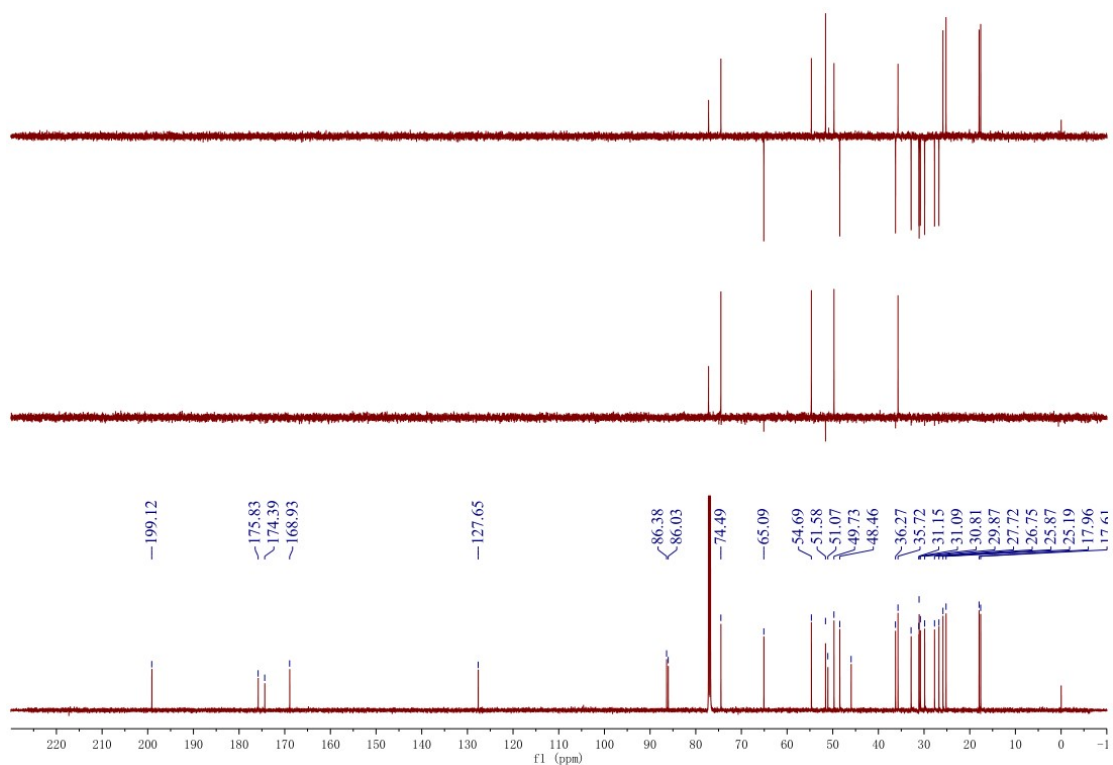

Figure S63. HSQC spectrum (600/150 MHz,  $\text{CDCl}_3$ ) of compound 10.

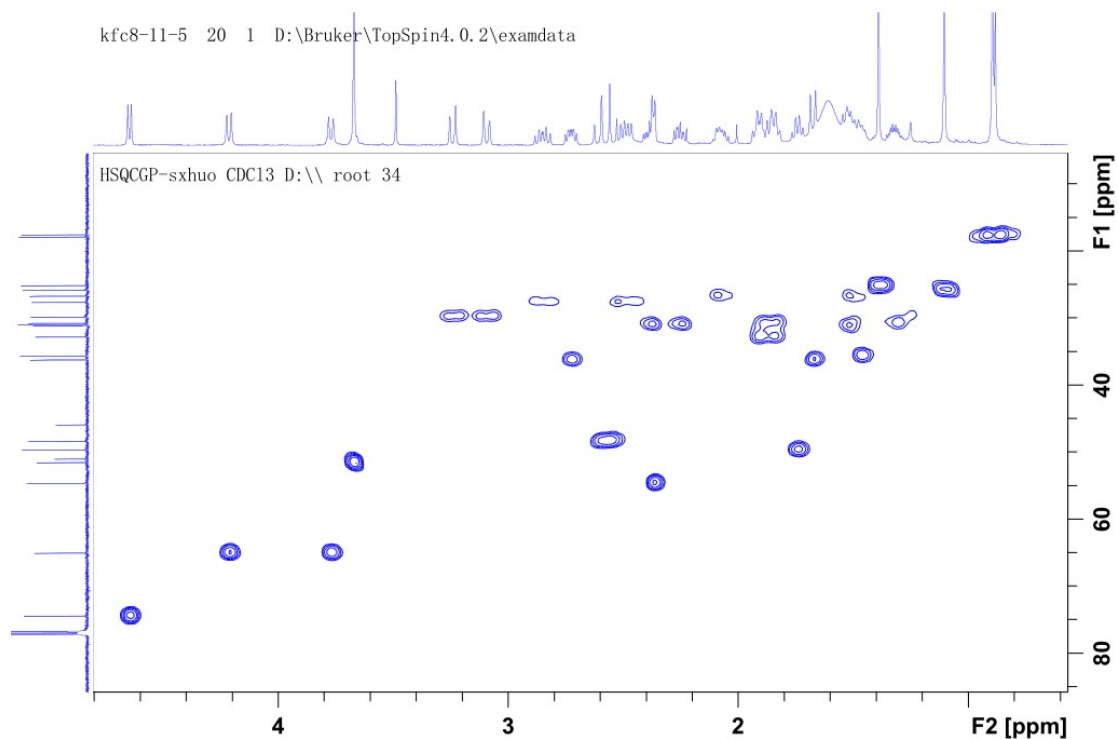



Figure S64. HMBC spectrum (600/150 MHz, CDCl<sub>3</sub>) of compound 10.

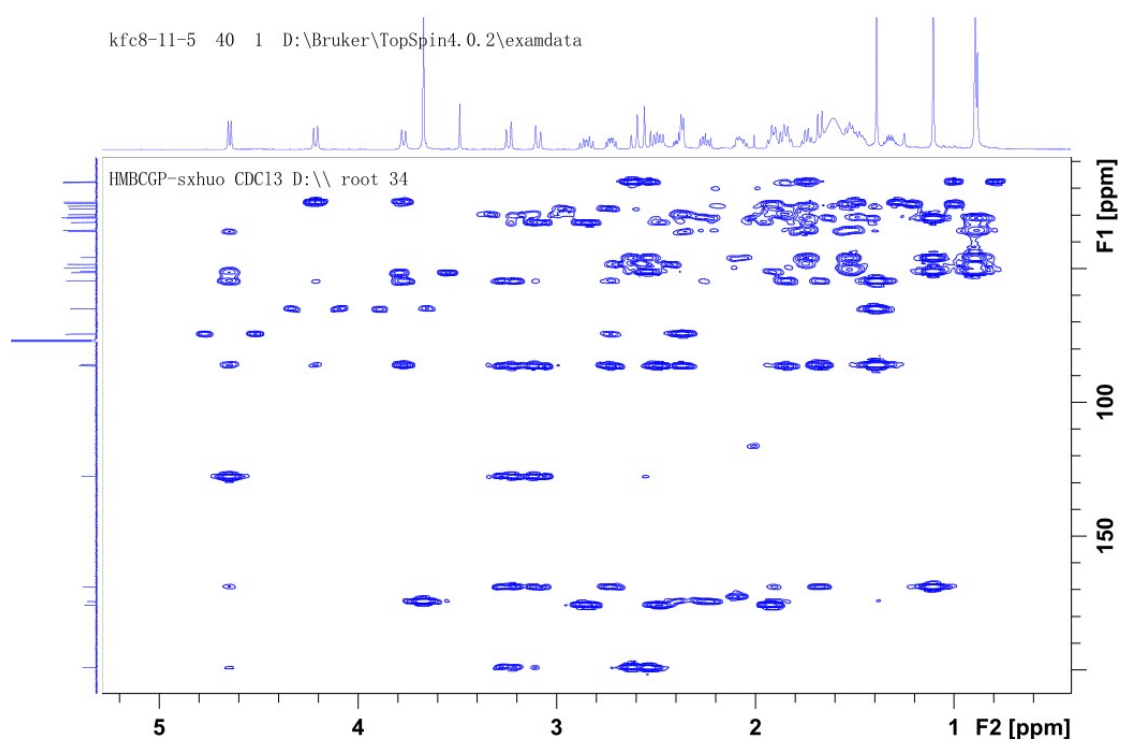

Figure S65. <sup>1</sup>H-<sup>1</sup>H COSY spectrum (600 MHz, CDCl<sub>3</sub>) of compound 10.

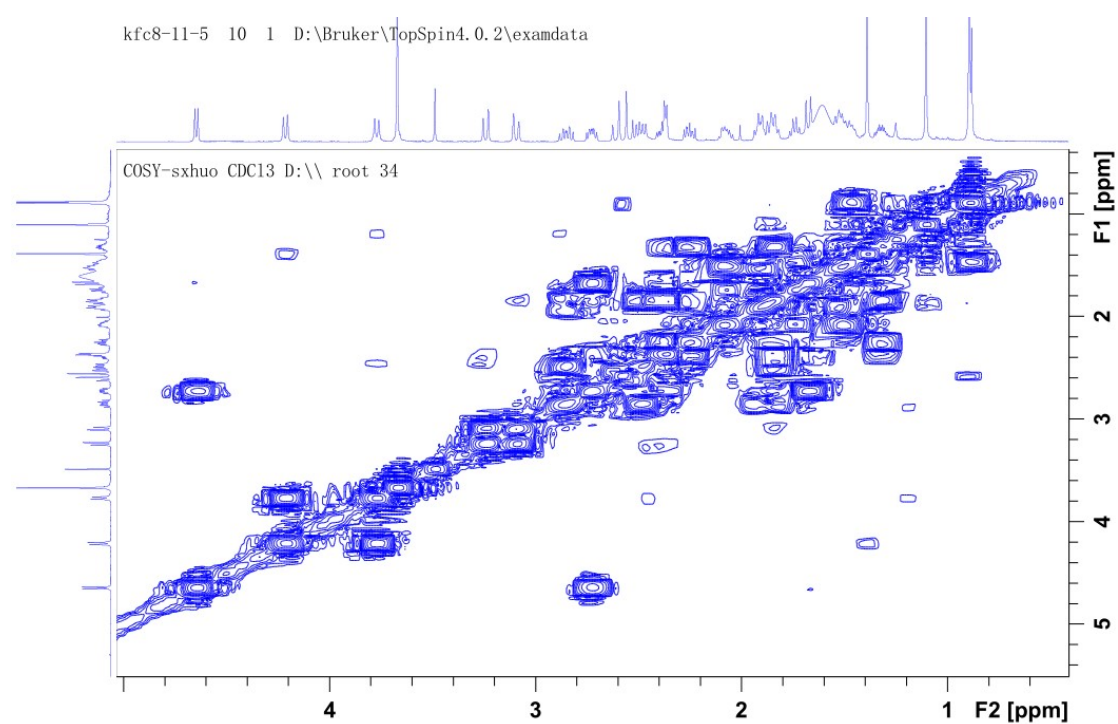

**Figure S66. ROESY spectrum (600 MHz, CDCl<sub>3</sub>) of compound 10.**

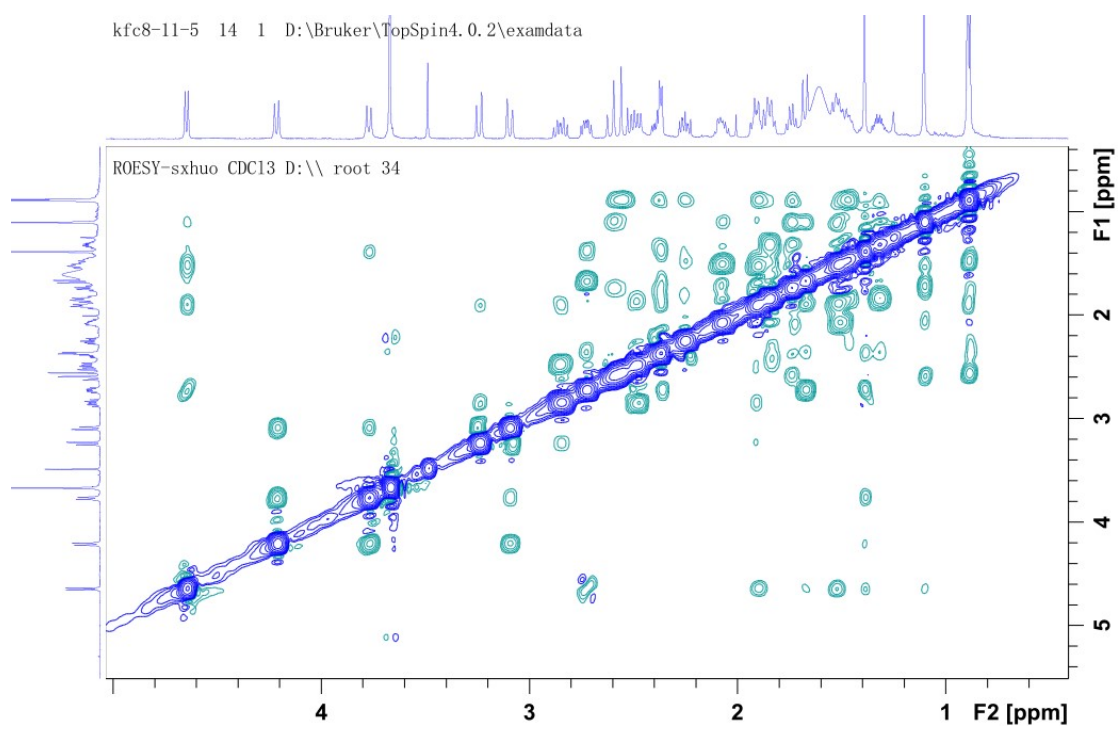

## HRESIMS spectra of new compounds

Figure S67. HRESIMS spectrum of compound 1.

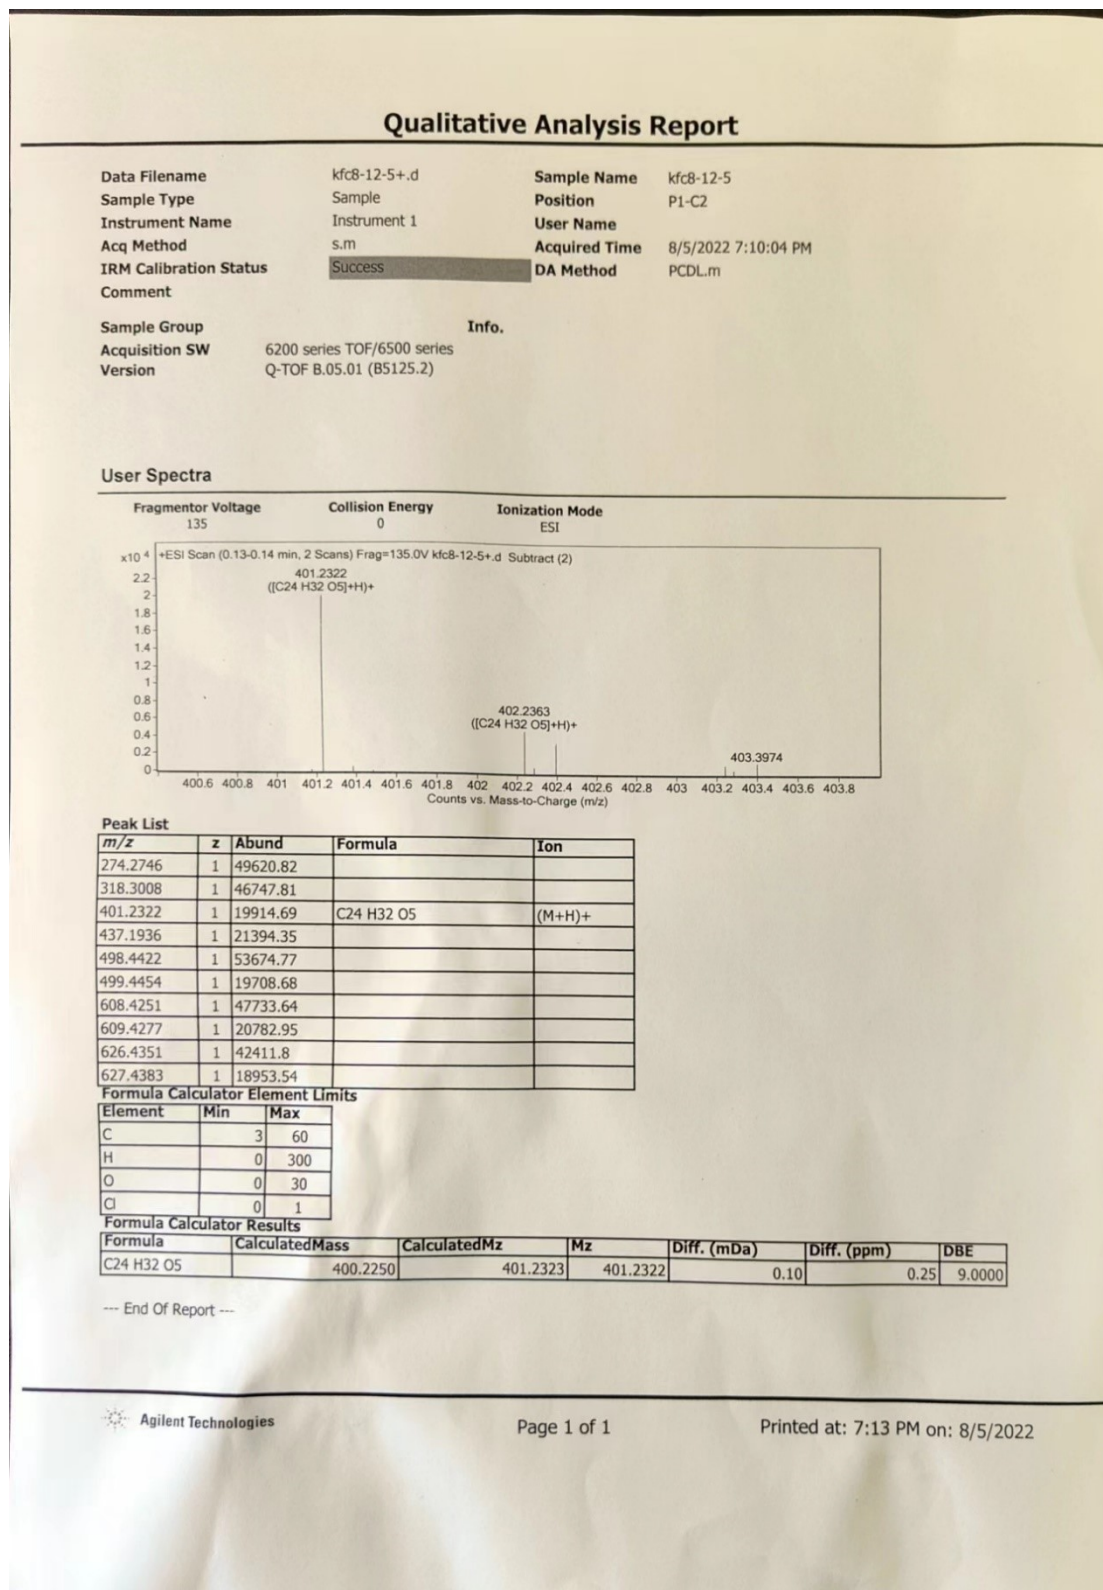

Page 1 of 1

Printed at: 7:13 PM on: 8/5/2022

Figure S68. HRESIMS spectrum of compound 2.

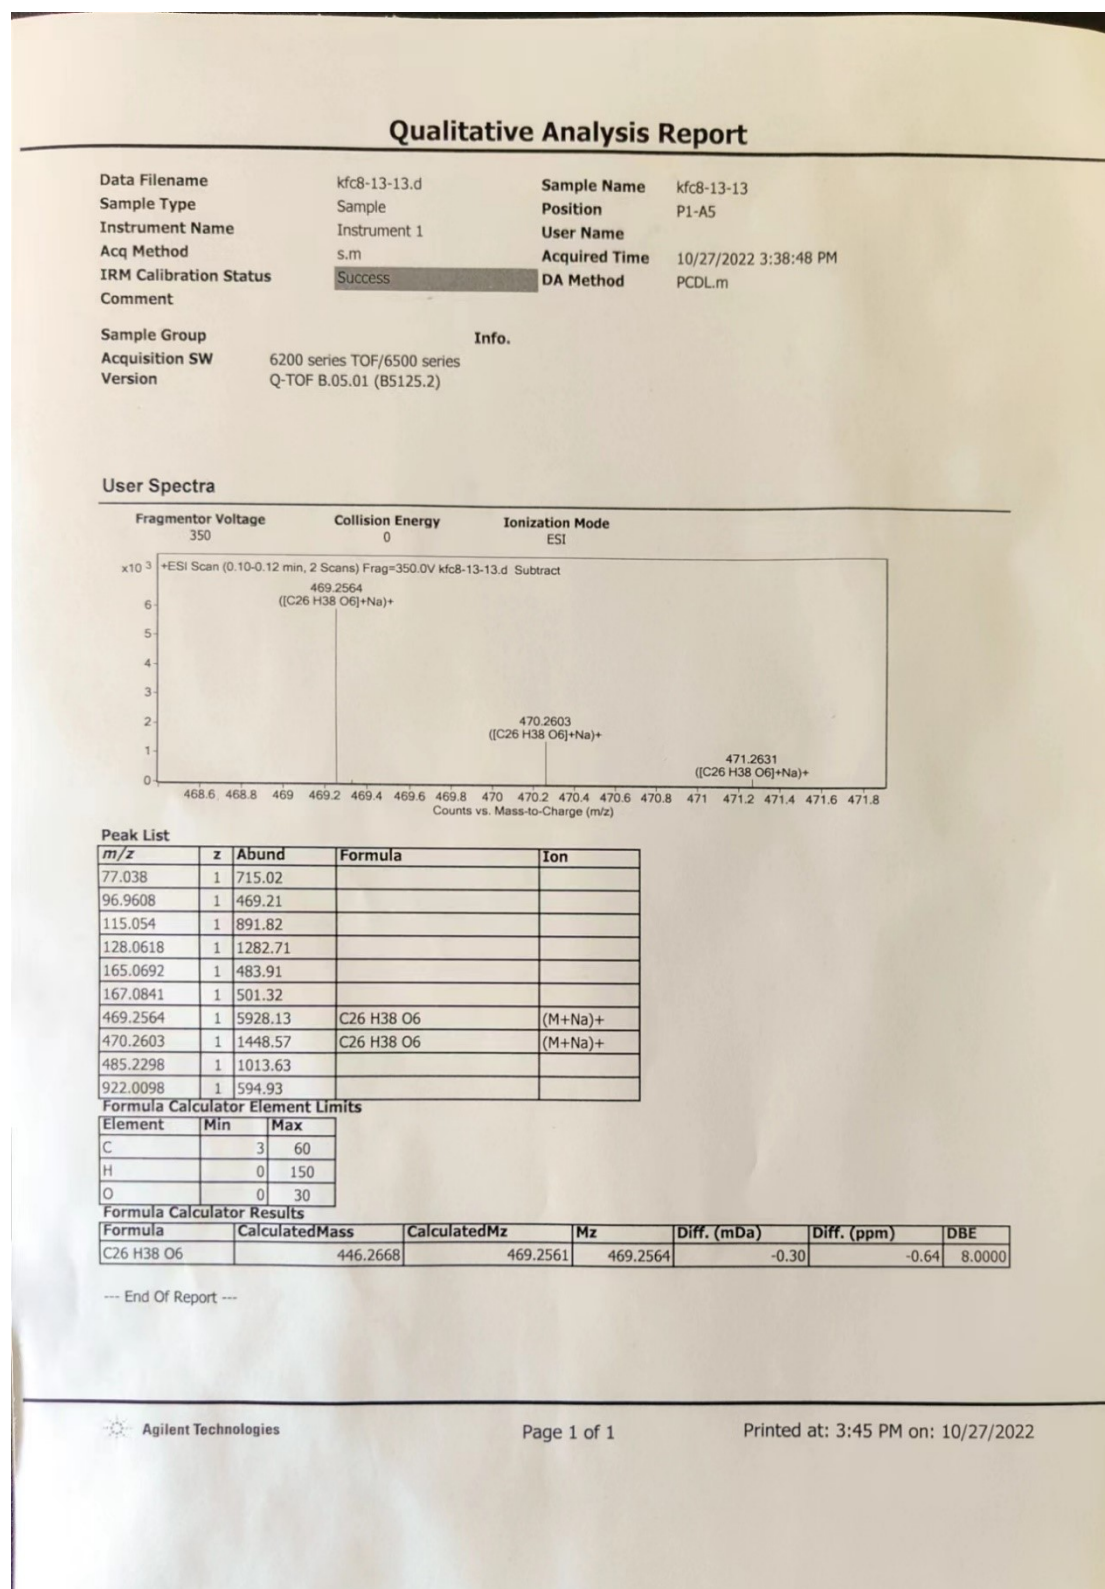

Figure S69. HRESIMS spectrum of compound 3.

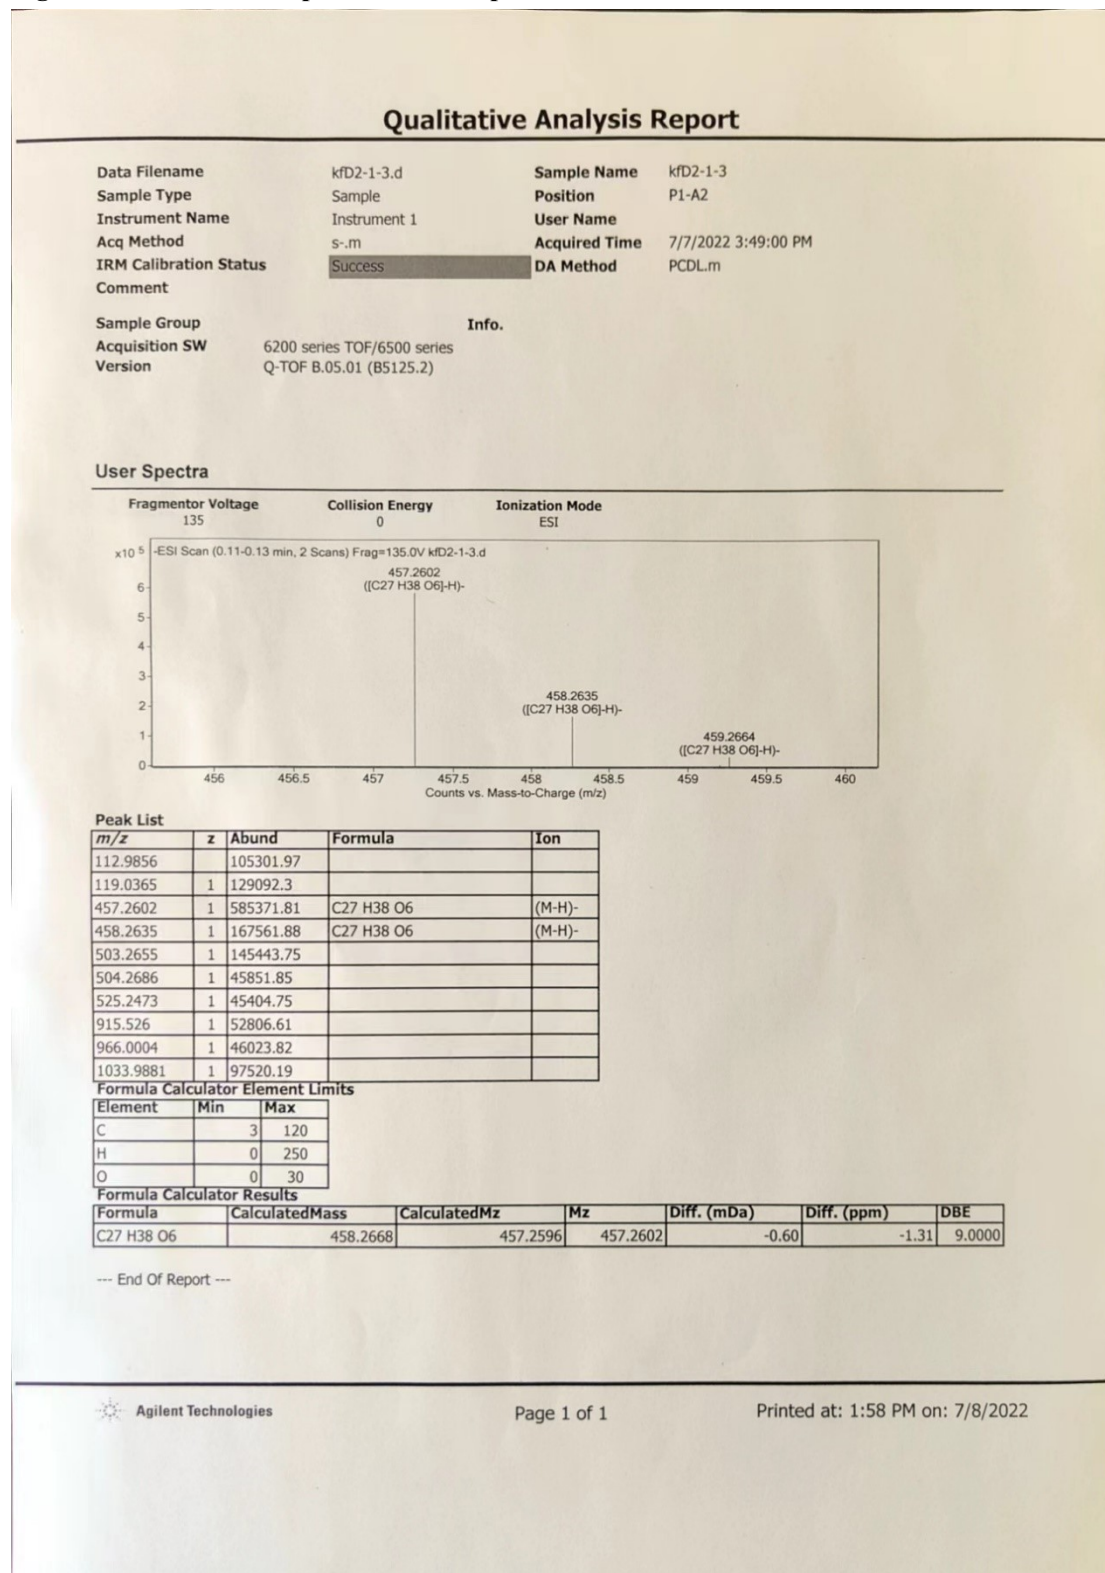

Figure S70. HRESIMS spectrum of compound 4.

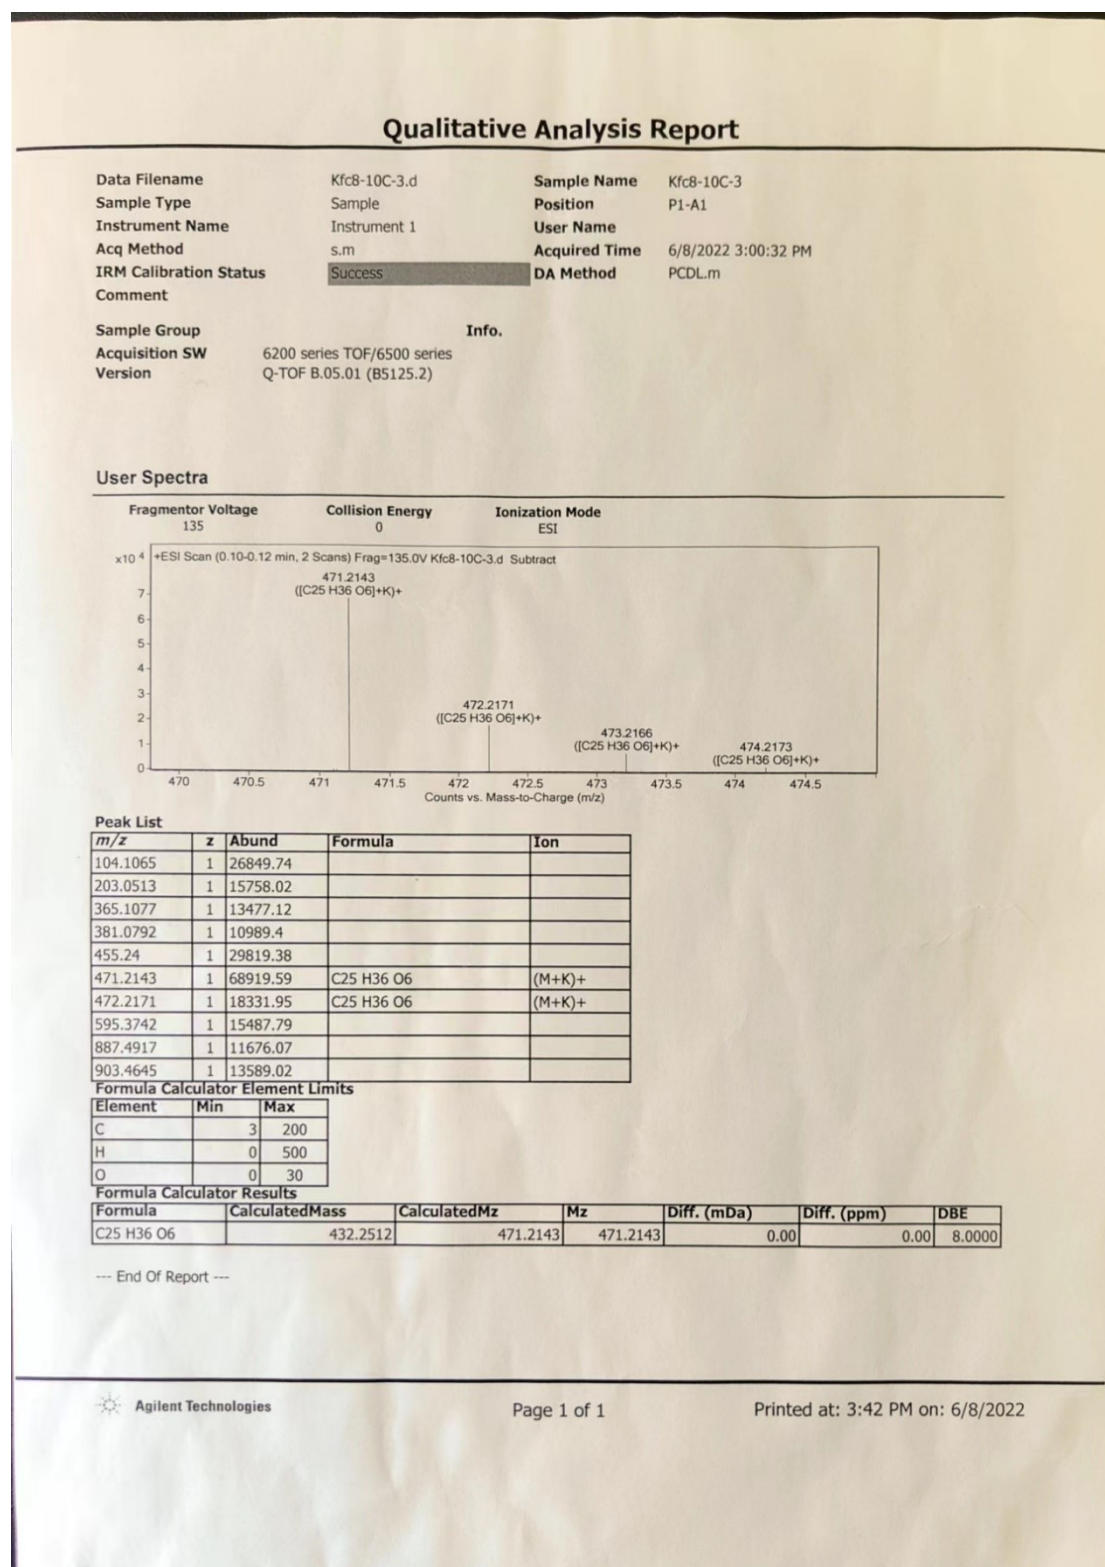

Figure S71. HRESIMS spectrum of compound 5.

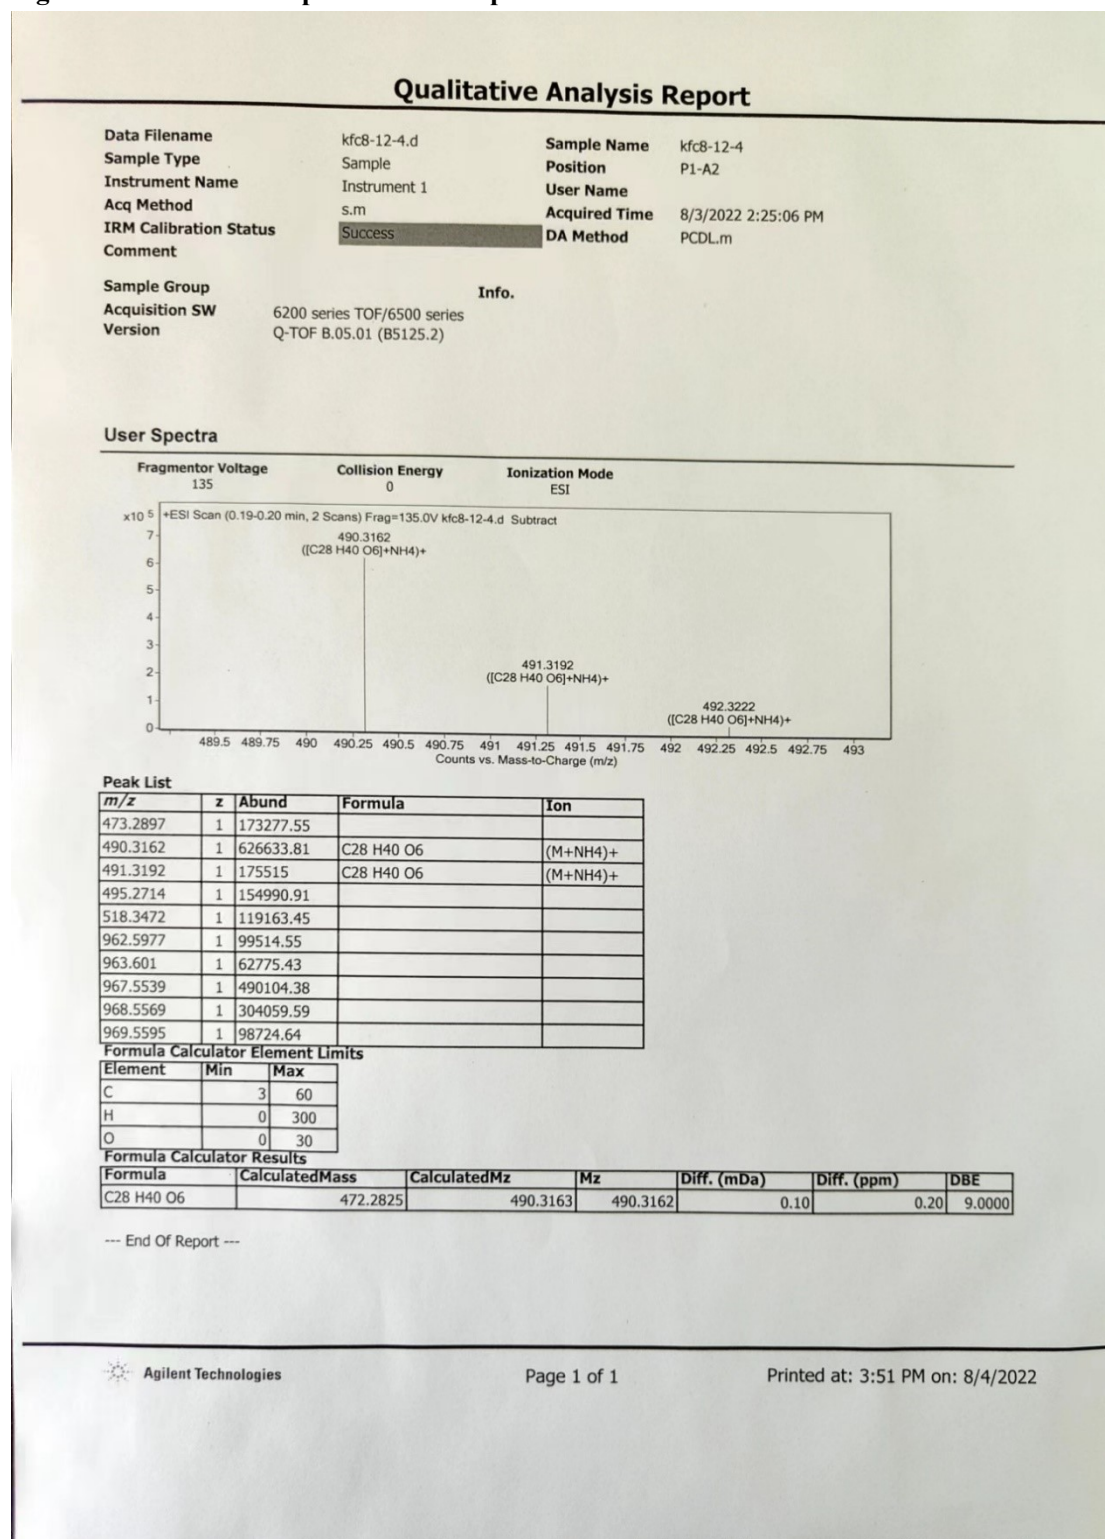

Figure S72. HRESIMS spectrum of compound 6.

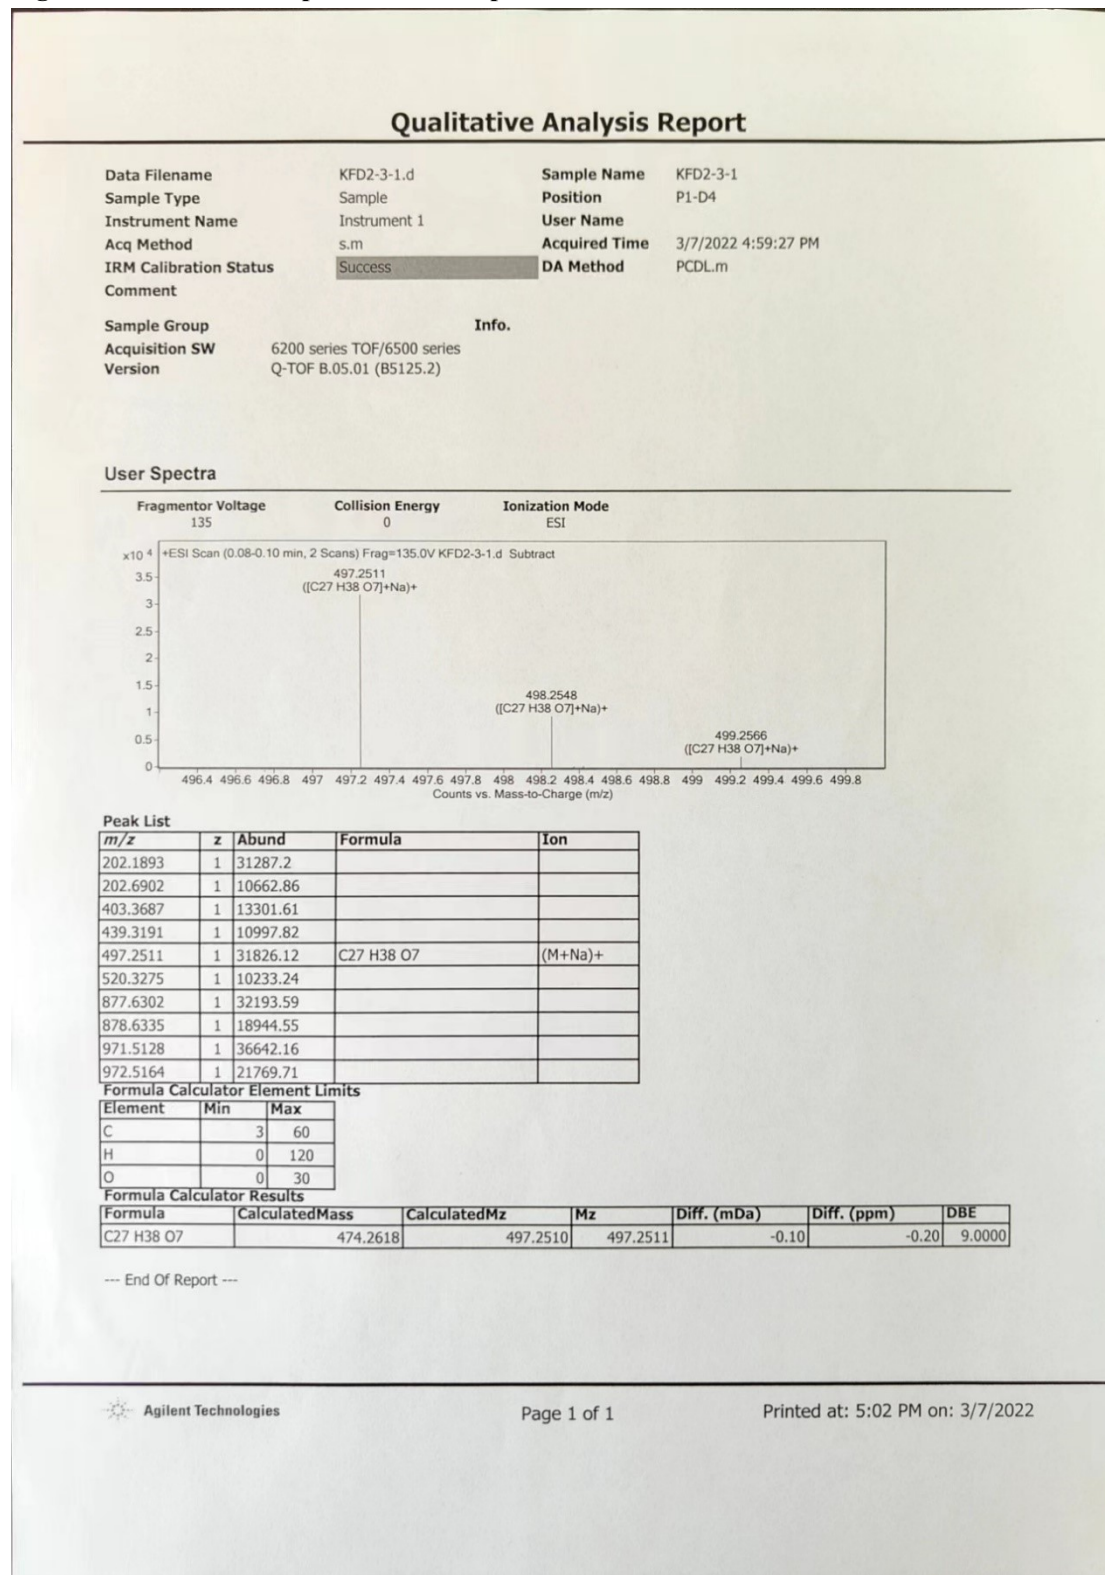



Figure S73. HRESIMS spectrum of compound 7.

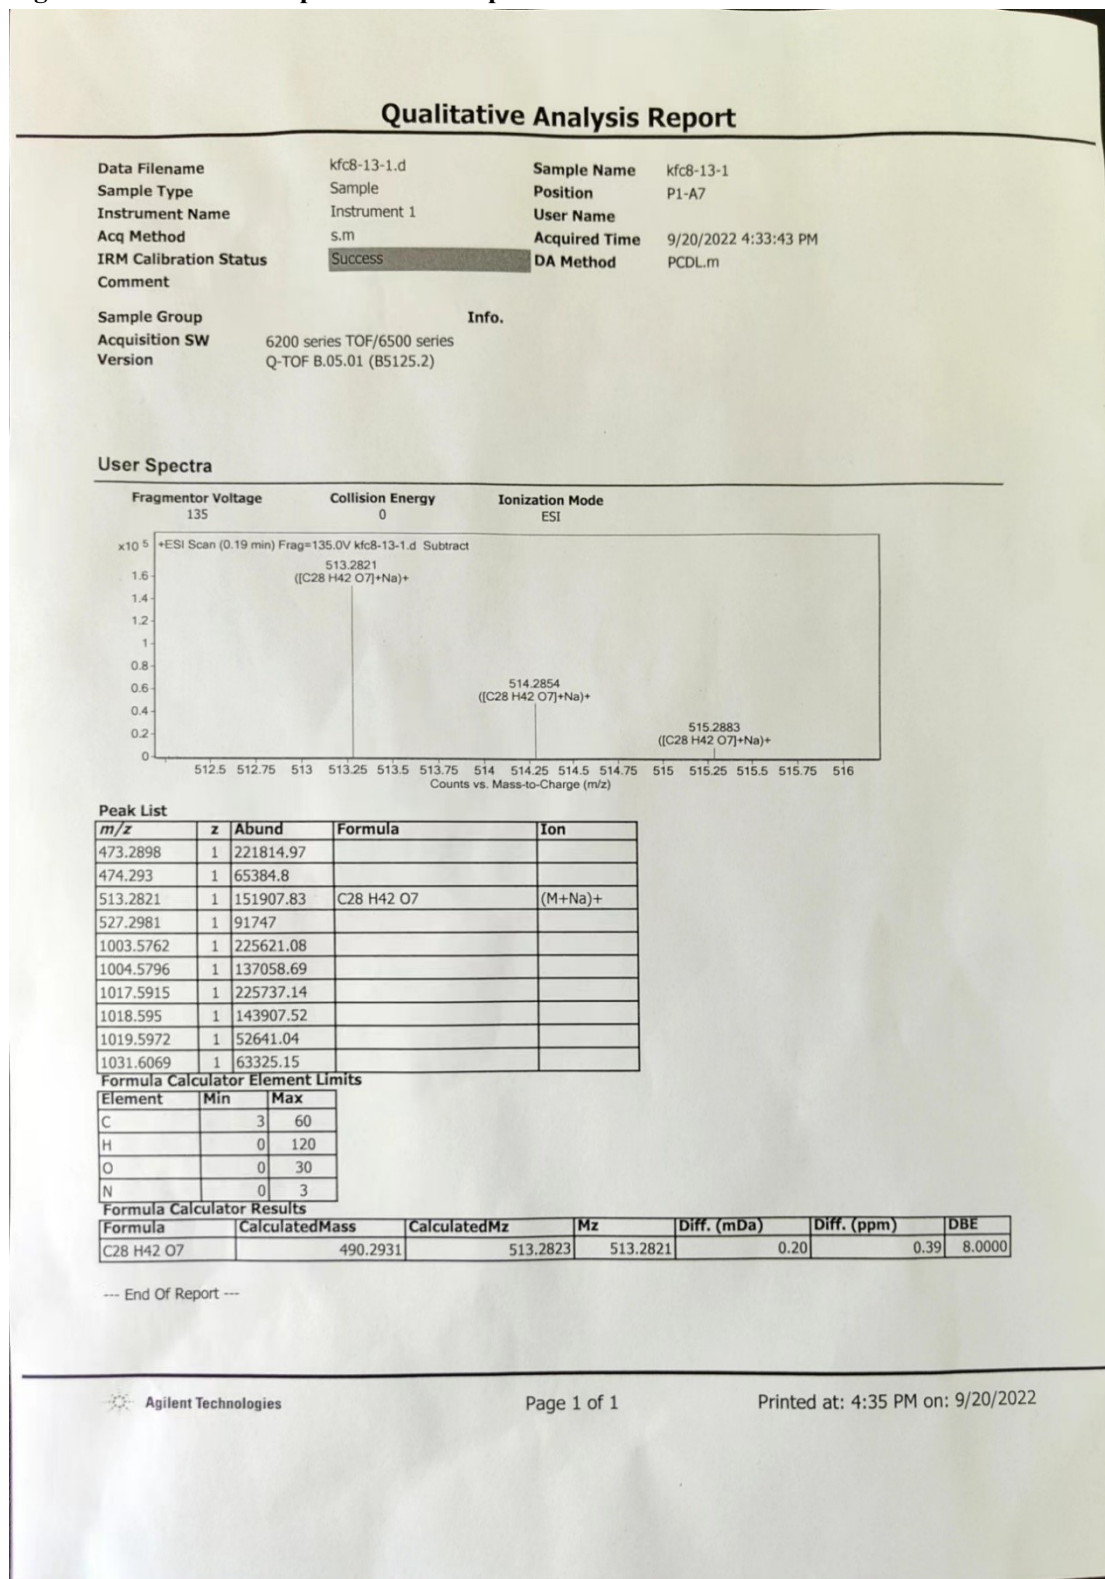

Figure S74. HRESIMS spectrum of compound 8.

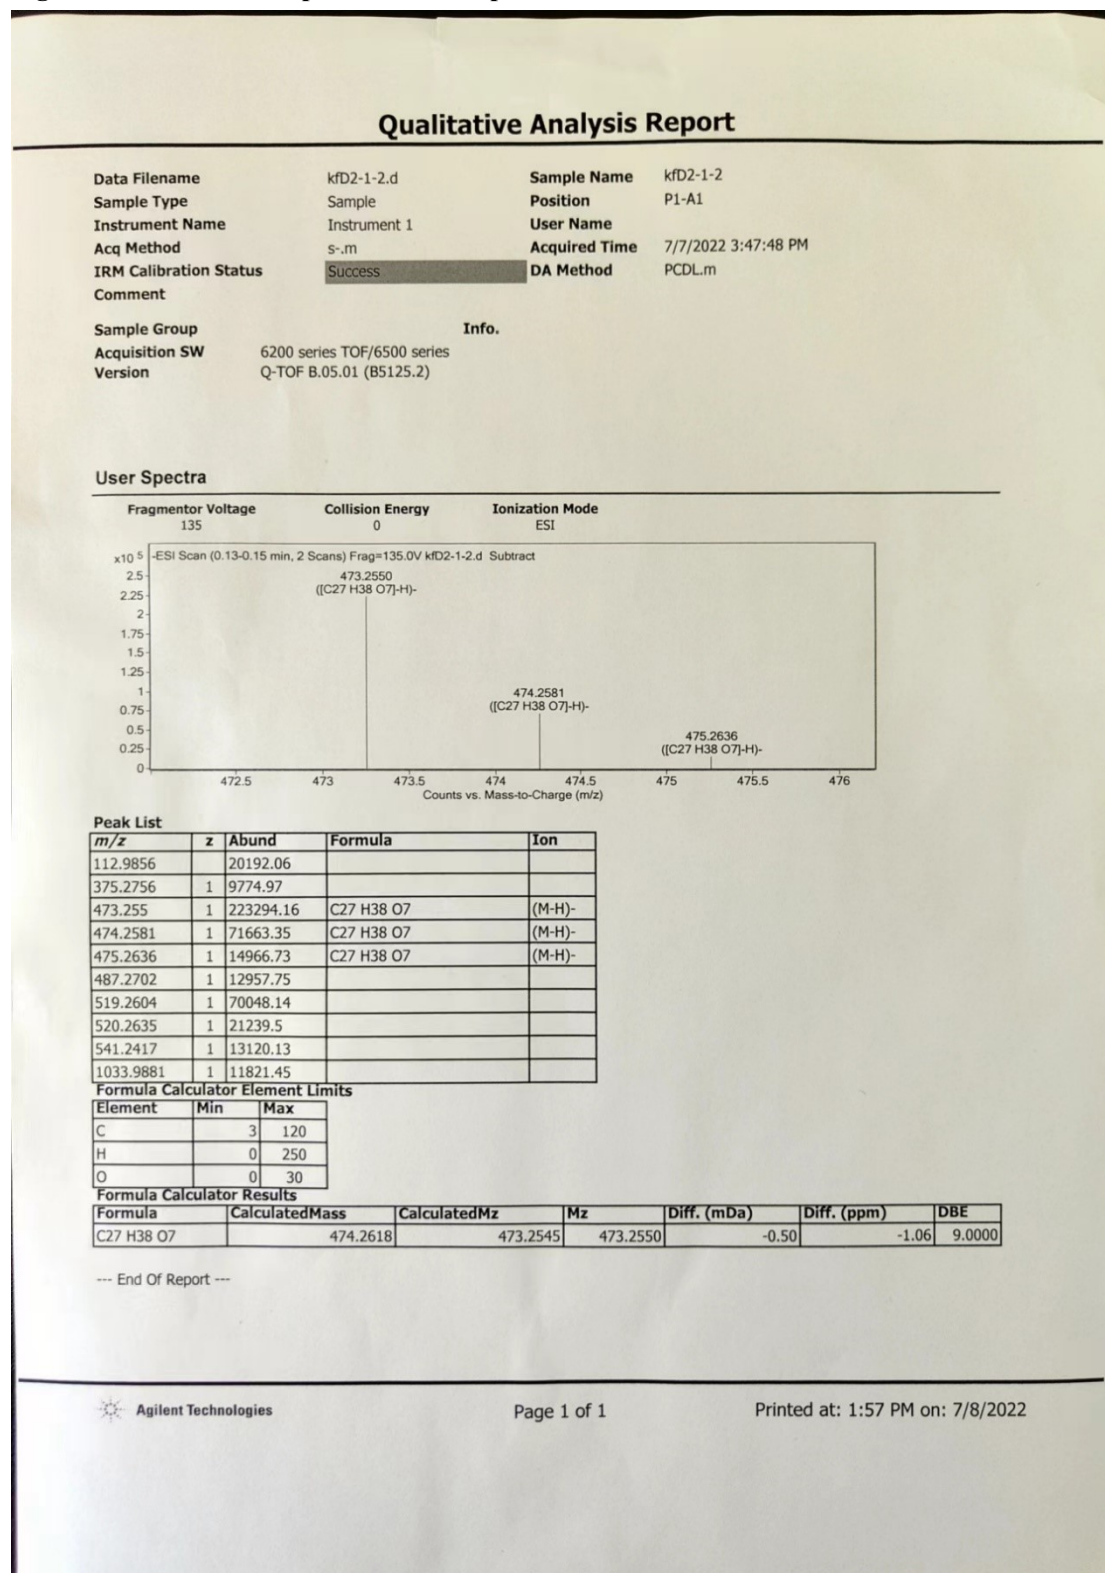

Figure S75. HRESIMS spectrum of compound 9.

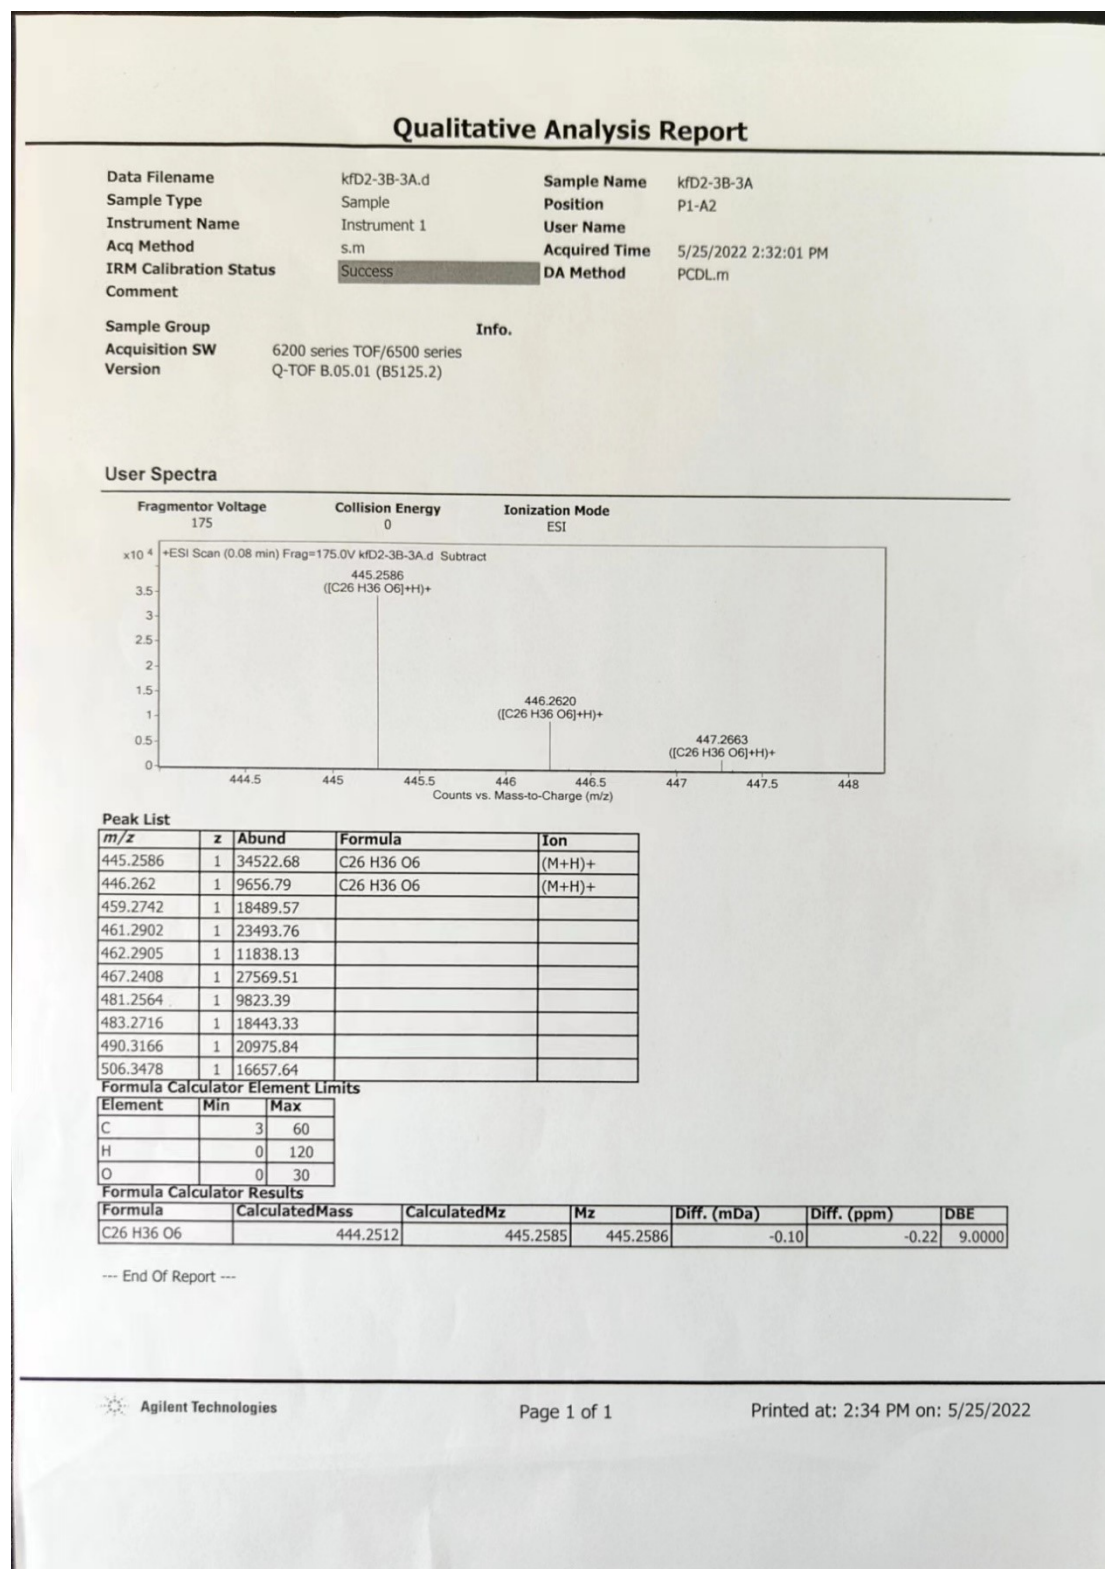

Figure S76. HRESIMS spectrum of compound 10.

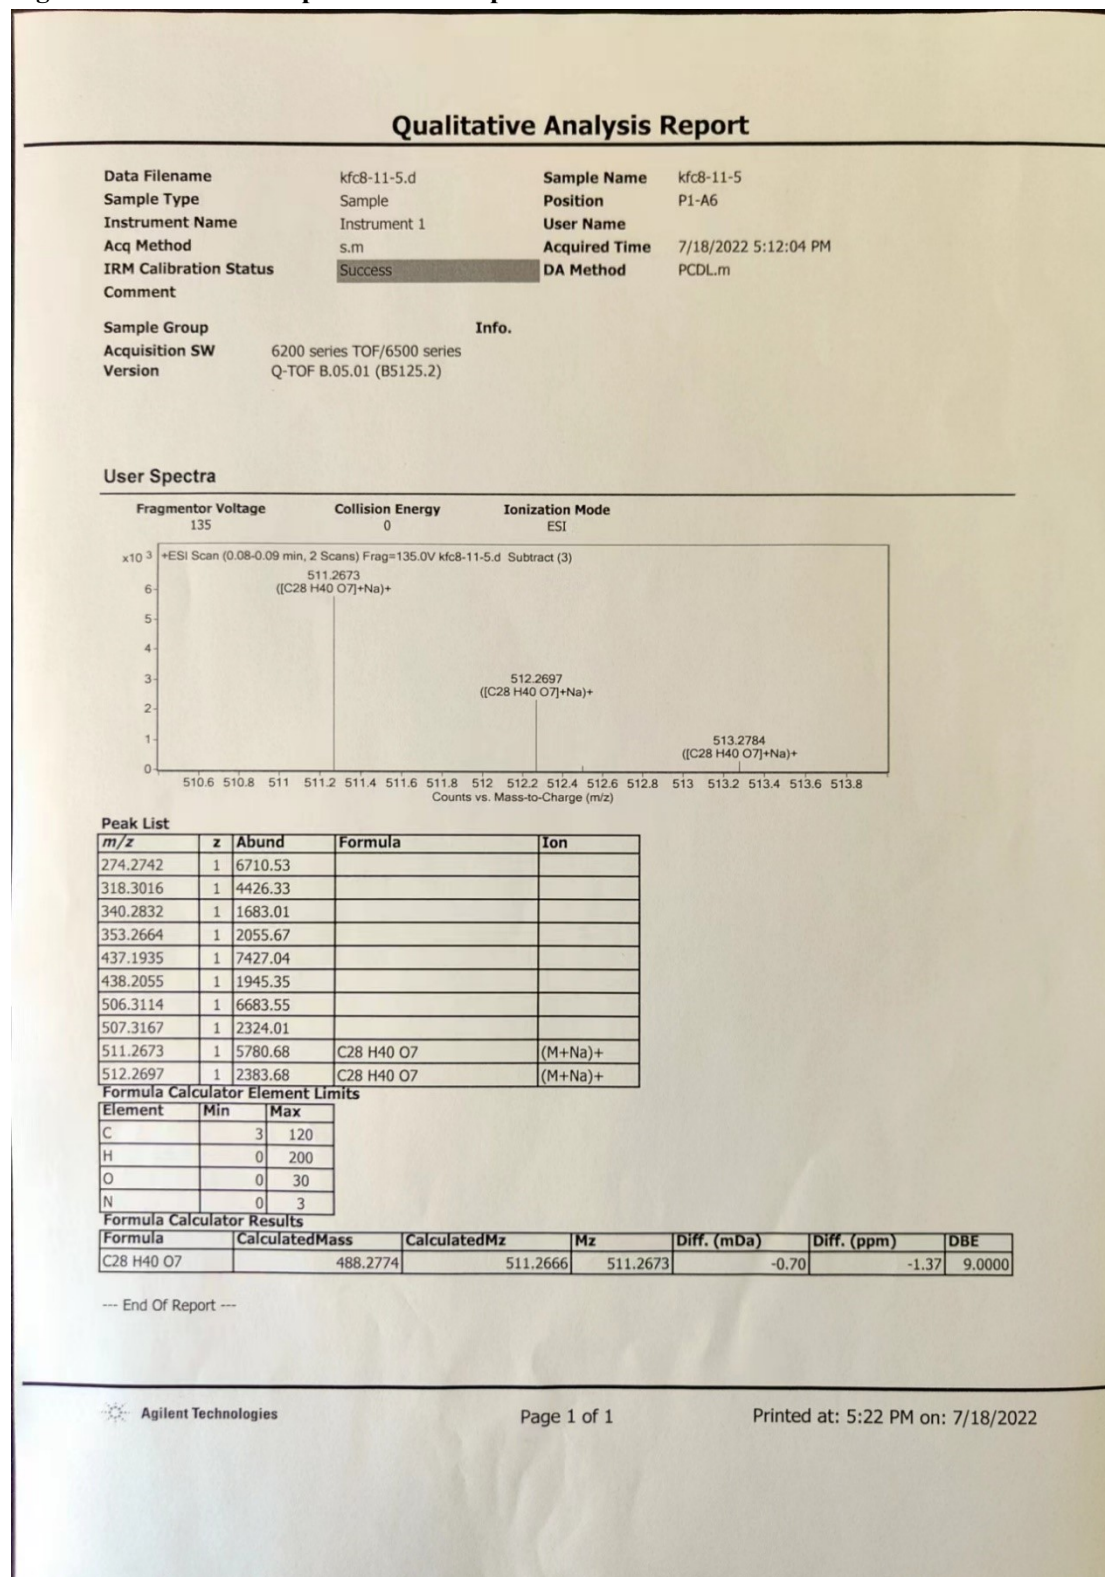

## X-ray crystallographic data of compounds 2, 4, and 5

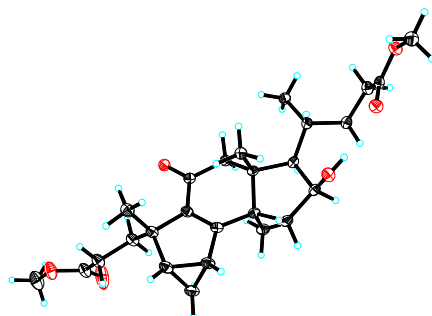

**Figure S77.** View of a molecule of compound **2** with the atom-labelling scheme. Displacement ellipsoids are drawn at the 30% probability level.

**Table S3. Crystal data and structure refinement for compound 2.**

|                                   |                                                |          |
|-----------------------------------|------------------------------------------------|----------|
| Identification code               | global                                         |          |
| Empirical formula                 | C <sub>26</sub> H <sub>38</sub> O <sub>6</sub> |          |
| Formula weight                    | 446.56                                         |          |
| Temperature                       | 150(2) K                                       |          |
| Wavelength                        | 1.54178 Å                                      |          |
| Crystal system                    | Orthorhombic                                   |          |
| Space group                       | P21212                                         |          |
| Unit cell dimensions              | a = 10.8614(3) Å                               | α = 90°. |
|                                   | b = 36.7053(9) Å                               | β = 90°. |
|                                   | c = 6.0922(2) Å                                | γ = 90°. |
| Volume                            | 2428.78(12) Å <sup>3</sup>                     |          |
| Z                                 | 4                                              |          |
| Density (calculated)              | 1.221 mg/m <sup>3</sup>                        |          |
| Absorption coefficient            | 0.689 mm <sup>-1</sup>                         |          |
| F(000)                            | 968                                            |          |
| Crystal size                      | 0.250 × 0.120 × 0.070 mm <sup>3</sup>          |          |
| Theta range for data collection   | 2.41 to 68.32°.                                |          |
| Index ranges                      | -13 ≤ h ≤ 12, -44 ≤ k ≤ 34, -7 ≤ l ≤ 6         |          |
| Reflections collected             | 15579                                          |          |
| Independent reflections           | 4402 [R(int) = 0.0887]                         |          |
| Completeness to theta = 68.32°    | 99.80%                                         |          |
| Absorption correction             | Semi-empirical from equivalents                |          |
| Max. and min. transmission        | 0.95 and 0.79                                  |          |
| Refinement method                 | Full-matrix least-squares on F <sup>2</sup>    |          |
| Data / restraints / parameters    | 4402 / 0 / 296                                 |          |
| Goodness-of-fit on F <sup>2</sup> | 1.099                                          |          |
| Final R indices [I > 2σ(I)]       | R1 = 0.0335, wR2 = 0.0856                      |          |
| R indices (all data)              | R1 = 0.0597, wR2 = 0.0960                      |          |
| Absolute structure parameter      | -0.05(6)                                       |          |

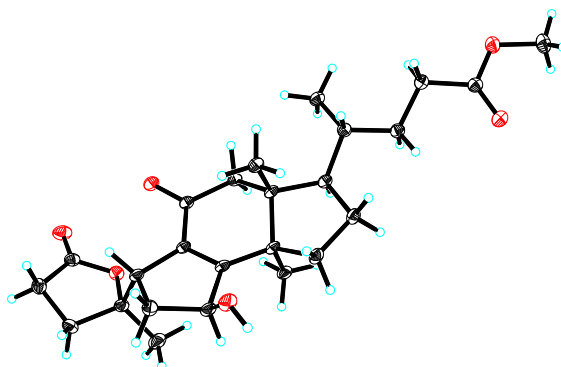

**Figure S78.** View of a molecule of compound **4** with the atom-labelling scheme. Displacement ellipsoids are drawn at the 30% probability level.

**Table S4. Crystal data and structure refinement for compound 4.**

|                                   |                                                |          |
|-----------------------------------|------------------------------------------------|----------|
| Identification code               | global                                         |          |
| Empirical formula                 | C <sub>25</sub> H <sub>36</sub> O <sub>6</sub> |          |
| Formula weight                    | 432.54                                         |          |
| Temperature                       | 150(2) K                                       |          |
| Wavelength                        | 1.54178 Å                                      |          |
| Crystal system                    | Orthorhombic                                   |          |
| Space group                       | P212121                                        |          |
| Unit cell dimensions              | a = 7.7089(3) Å                                | α = 90°. |
|                                   | b = 8.1588(3) Å                                | β = 90°. |
|                                   | c = 36.7130(13) Å                              | γ = 90°. |
| Volume                            | 2309.08(15) Å <sup>3</sup>                     |          |
| Z                                 | 4                                              |          |
| Density (calculated)              | 1.244 mg/m <sup>3</sup>                        |          |
| Absorption coefficient            | 0.709 mm <sup>-1</sup>                         |          |
| F(000)                            | 936                                            |          |
| Crystal size                      | 0.680 × 0.190 × 0.040 mm <sup>3</sup>          |          |
| Theta range for data collection   | 2.41 to 69.95°.                                |          |
| Index ranges                      | -9 ≤ h ≤ 9, -7 ≤ k ≤ 9, -44 ≤ l ≤ 44           |          |
| Reflections collected             | 16444                                          |          |
| Independent reflections           | 4355 [R(int) = 0.0890]                         |          |
| Completeness to theta = 69.95°    | 99.90%                                         |          |
| Absorption correction             | Semi-empirical from equivalents                |          |
| Max. and min. transmission        | 0.97 and 0.78                                  |          |
| Refinement method                 | Full-matrix least-squares on F <sup>2</sup>    |          |
| Data / restraints / parameters    | 4355 / 0 / 286                                 |          |
| Goodness-of-fit on F <sup>2</sup> | 1.146                                          |          |
| Final R indices [I > 2σ(I)]       | R1 = 0.0449, wR2 = 0.1142                      |          |
| R indices (all data)              | R1 = 0.0600, wR2 = 0.1190                      |          |
| Absolute structure parameter      | 0.07(8)                                        |          |
| Largest diff. peak and hole       | 0.482 and -0.454 e.Å <sup>-3</sup>             |          |

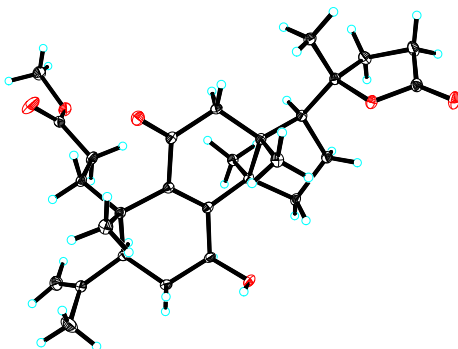

**Figure S79.** View of a molecule of compound **5** with the atom-labelling scheme. Displacement ellipsoids are drawn at the 30% probability level.

**Table S5. Crystal data and structure refinement for compound 5.**

|                                   |                                                |          |
|-----------------------------------|------------------------------------------------|----------|
| Identification code               | global                                         |          |
| Empirical formula                 | C <sub>28</sub> H <sub>40</sub> O <sub>6</sub> |          |
| Formula weight                    | 472.6                                          |          |
| Temperature                       | 150(2) K                                       |          |
| Wavelength                        | 1.54178 Å                                      |          |
| Crystal system                    | Monoclinic                                     |          |
| Space group                       | P 1 21 1                                       |          |
| Unit cell dimensions              | a = 8.1802(3) Å                                | α = 90°. |
|                                   | b = 13.5202(4) Å                               | β = 90°. |
|                                   | c = 11.2870(4) Å                               | γ = 90°. |
| Volume                            | 1246.94(7) Å <sup>3</sup>                      |          |
| Z                                 | 2                                              |          |
| Density (calculated)              | 1.259 mg/m <sup>3</sup>                        |          |
| Absorption coefficient            | 0.701 mm <sup>-1</sup>                         |          |
| F(000)                            | 512                                            |          |
| Crystal size                      | 0.540 × 0.450 × 0.280 mm <sup>3</sup>          |          |
| Theta range for data collection   | 3.92 to 72.31°.                                |          |
| Index ranges                      | -8 ≤ h ≤ 10, -16 ≤ k ≤ 16, -13 ≤ l ≤ 13        |          |
| Reflections collected             | 22359                                          |          |
| Independent reflections           | 4854 [R(int) = 0.0348]                         |          |
| Completeness to theta = 69.95°    | 99.00%                                         |          |
| Absorption correction             | Semi-empirical from equivalents                |          |
| Max. and min. transmission        | 0.83 and 0.69                                  |          |
| Refinement method                 | Full-matrix least-squares on F <sup>2</sup>    |          |
| Data / restraints / parameters    | 4854 / 1 / 314                                 |          |
| Goodness-of-fit on F <sup>2</sup> | 0.978                                          |          |
| Final R indices [I > 2σ(I)]       | R1 = 0.0311, wR2 = 0.1015                      |          |
| R indices (all data)              | R1 = 0.0312, wR2 = 0.1017                      |          |
| Absolute structure parameter      | -0.09(3)                                       |          |
| Largest diff. peak and hole       | 0.213 and -0.214 e.Å <sup>-3</sup>             |          |

### Calculated ECD data of compound 3

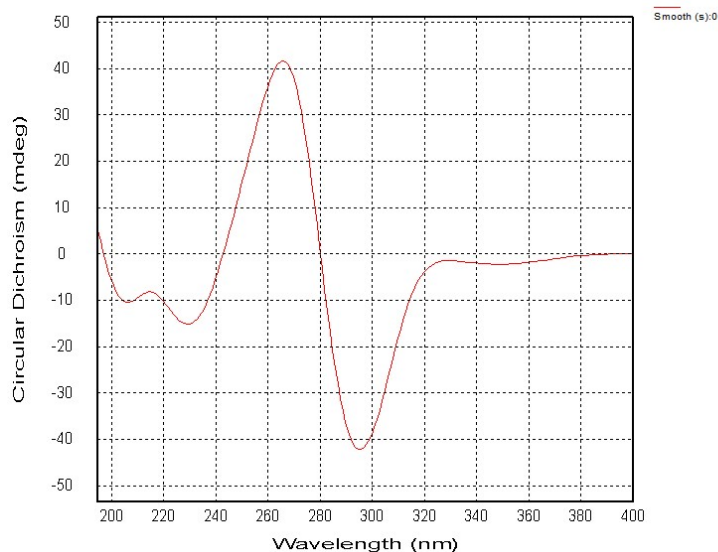

File: compound 2-1mm (195-400) 22090803.dsx

ProBinaryX

Attributes :

- Time Stamp: Thu Sep 08 13:38:16 2022
- File ID : F361B51F-DFB3-4086-8AA1-5D9E05E7A180
- Is CFR Compliant: false
- Original data has not been modified.

Remarks:

- User: CD
- Date: 2022/09/08
- Instrument: 0547
- DetectorType: LAAPD
- DichOS Calibration Correction Curve: 0547/2
- HV (CDDC channel): 0 v
- Time per point: 1 s
- Description: Sample 1
- Concentration: 0.4600 mg/mL MeOH
- Pathlength: 1 mm
- Temperature: 20°C

Settings:

- Time-per-point: 1s (25us x 40000)
- SE
- Wavelength: 195nm - 400nm
- Step Size: 1nm
- Bandwidth: 1nm

**Figure S80. The CD spectrum of compound 3.**



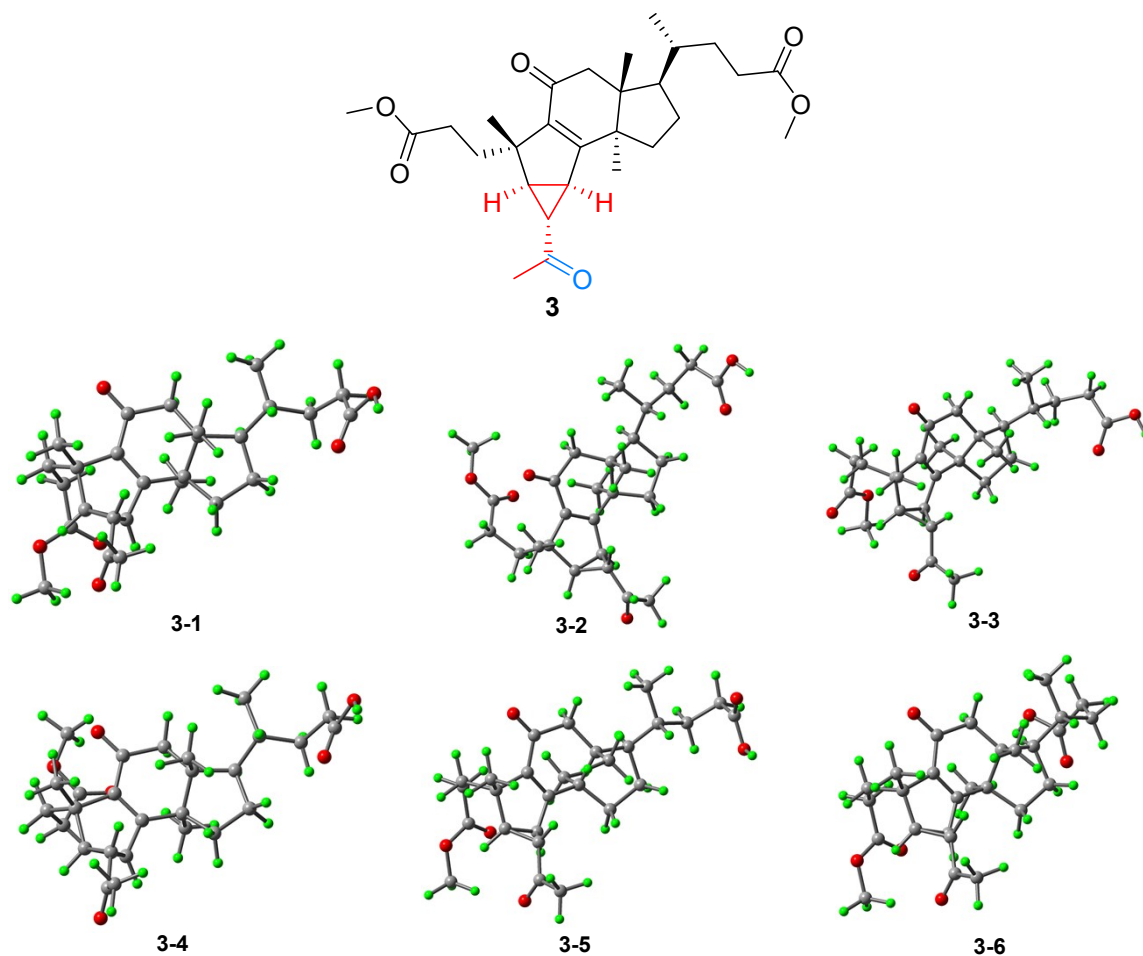

Figure S81. Six optimized conformers of 3.

Table S6. Conformational analysis of the six optimized conformers of 3 in the gas phase (T = 298.15 K)

| Conformer | E (Hartree)  | C (Hartree) | G (kcal/mol)   | $\Delta G$ (kcal/mol) | Population |
|-----------|--------------|-------------|----------------|-----------------------|------------|
| 3-1       | -1502.963528 | 0.537406    | -942787.415691 | 0                     | 50.38%     |
| 3-2       | -1502.961835 | 0.536663    | -942786.819782 | 0.595908597           | 18.42%     |
| 3-3       | -1502.961967 | 0.537037    | -942786.667542 | 0.748148798           | 14.24%     |
| 3-4       | -1502.961837 | 0.537663    | -942786.193728 | 1.221962773           | 6.40%      |
| 3-5       | -1502.962021 | 0.537875    | -942786.175875 | 1.239815433           | 6.21%      |
| 3-6       | -1502.963046 | 0.539234    | -942785.965986 | 1.449704978           | 4.35%      |

Electronic energy obtained at M062X/6-311+G(2d,p) EmpiricalDispersion=GD3 of theory; Thermal correction to Gibbs free energy obtained at B3LYP/6-31G(d) Scale=0.9813 SCRF=(IEFPCM,Solvent=Methanol) EmpiricalDispersion=GD3BJ of theory; Gibbs free energy (E + C); The relative Gibbs free energy; The Boltzmann distribution of each conformer.

**Table S7. Atomic coordinates (Å) of 3-1 obtained at the Cam-B3LYP/6-311+G(d,p) level of theory in the MeOH.**

|   |           |           |           |   |           |           |           |
|---|-----------|-----------|-----------|---|-----------|-----------|-----------|
| C | -3.23512  | 0.526145  | -0.56739  | H | 0.119621  | -2.313954 | 0.32708   |
| C | -2.122056 | 2.896378  | -0.333574 | H | 0.932854  | 1.843407  | 2.580452  |
| C | -1.13449  | 0.773697  | 0.569663  | H | 1.159912  | 2.32409   | 0.903301  |
| C | -1.824834 | -0.010336 | -0.300388 | H | 3.317207  | 1.374559  | 1.078659  |
| C | 0.19691   | 0.375992  | 1.122447  | H | 2.906236  | 0.525473  | 2.556464  |
| C | 1.018129  | -0.352274 | -0.001508 | H | 2.240756  | -1.418372 | 1.42333   |
| C | 0.207584  | -1.568463 | -0.473631 | H | 1.875098  | 1.435588  | -0.975986 |
| C | -1.219404 | -1.201115 | -0.89923  | H | 1.752793  | 0.019954  | -2.016593 |
| C | 1.178004  | 1.466868  | 1.582592  | H | 0.308422  | 0.950923  | -1.62946  |
| C | 2.5539    | 0.744099  | 1.544493  | H | -0.729933 | -1.391108 | 2.084626  |
| C | 2.37444   | -0.581764 | 0.725174  | H | 0.786959  | -0.862865 | 2.855399  |
| C | 1.24866   | 0.574155  | -1.219442 | H | -0.695622 | 0.065459  | 3.074908  |
| C | -0.12209  | -0.524864 | 2.351256  | H | 3.808412  | -0.068877 | -0.792381 |
| O | -1.811074 | -1.911788 | -1.716835 | H | 3.074056  | -3.015872 | -0.36453  |
| C | -1.894902 | 1.997591  | 0.899677  | H | 4.370407  | -2.489437 | -1.446797 |
| C | 3.615907  | -0.918382 | -0.125625 | H | 2.708263  | -2.027755 | -1.78732  |
| C | 3.428958  | -2.179904 | -0.980128 | H | 4.840201  | -0.320261 | 1.575478  |
| C | 4.850734  | -1.078924 | 0.789155  | H | 4.800665  | -2.054169 | 1.290153  |
| C | 6.187484  | -0.969472 | 0.053952  | H | 7.015565  | -1.257482 | 0.715448  |
| C | 6.485584  | 0.434647  | -0.422474 | H | 6.250334  | -1.643829 | -0.806332 |
| O | 7.5108    | 0.453524  | -1.303706 | H | 7.666171  | 1.387841  | -1.542075 |
| O | 5.917714  | 1.449686  | -0.0675   | H | -4.587147 | 1.070781  | -2.180456 |
| C | -3.585291 | 0.643382  | -2.058433 | H | -3.554387 | -0.332164 | -2.546478 |
| C | -4.320083 | -0.278333 | 0.203834  | H | -2.872753 | 1.295602  | -2.573463 |
| C | -3.173286 | 1.904277  | 0.119222  | H | -4.073245 | -0.255477 | 1.270618  |
| C | -2.38695  | 4.33414   | -0.060752 | H | -5.263685 | 0.2677    | 0.081917  |
| C | -1.86563  | 5.315466  | -1.085307 | H | -2.123343 | 6.336742  | -0.798902 |
| O | -2.990992 | 4.69569   | 0.942761  | H | -0.776564 | 5.21837   | -1.174124 |
| C | -4.562293 | -1.732381 | -0.210113 | H | -2.285984 | 5.088097  | -2.072495 |
| C | -3.570128 | -2.718017 | 0.366447  | H | -5.550165 | -2.046474 | 0.15403   |
| O | -3.611285 | -3.887548 | -0.295365 | H | -4.58428  | -1.858993 | -1.294175 |
| O | -2.850457 | -2.523466 | 1.329283  | H | -1.651088 | -4.534083 | -0.035085 |
| C | -2.671157 | -4.884598 | 0.141134  | H | -2.804144 | -5.10518  | 1.202588  |
| H | -4.086743 | 2.334432  | 0.517025  | H | -2.878612 | -5.767613 | -0.462583 |
| H | -1.809333 | 2.499346  | 1.857341  |   |           |           |           |
| H | -1.539323 | 2.667968  | -1.220473 |   |           |           |           |
| H | 0.663282  | -2.079206 | -1.324518 |   |           |           |           |

**Table S8. Atomic coordinates (Å) of 3-2 obtained at the Cam-B3LYP/6-311+G(d,p) level of theory in the MeOH.**

|   |           |           |           |   |           |           |           |
|---|-----------|-----------|-----------|---|-----------|-----------|-----------|
| C | 2.79563   | -0.680457 | 1.390819  | H | -0.971786 | -2.854745 | 0.019287  |
| C | 2.253769  | 1.860815  | 0.967764  | H | -0.512386 | 1.333837  | -2.353118 |
| C | 0.992294  | -0.055739 | -0.061568 | H | -0.853291 | 1.911142  | -0.726491 |
| C | 1.375258  | -0.941184 | 0.894516  | H | -3.119431 | 1.416268  | -1.174525 |
| C | -0.299256 | -0.200235 | -0.799252 | H | -2.70924  | 0.467029  | -2.589887 |
| C | -1.396287 | -0.716837 | 0.201496  | H | -2.598587 | -1.545554 | -1.387277 |
| C | -0.933739 | -2.064621 | 0.779735  | H | -2.328413 | -0.135438 | 2.0802    |
| C | 0.501252  | -2.030152 | 1.332218  | H | -0.66748  | 0.431175  | 1.933556  |
| C | -0.961535 | 1.0526    | -1.395634 | H | -1.961149 | 1.24348   | 1.047634  |
| C | -2.450815 | 0.631029  | -1.540007 | H | 0.237855  | -2.187098 | -1.617189 |
| C | -2.657523 | -0.683452 | -0.709736 | H | -0.860791 | -1.257846 | -2.654587 |
| C | -1.593906 | 0.268625  | 1.377489  | H | 0.851171  | -0.819779 | -2.537107 |
| C | -0.011174 | -1.183595 | -1.970829 | H | -4.152325 | 0.141132  | 0.596154  |
| O | 0.880276  | -2.912542 | 2.106212  | H | -3.984226 | -2.902256 | 0.252736  |
| C | 2.02811   | 0.980112  | -0.272846 | H | -5.279195 | -2.099291 | 1.151181  |
| C | -4.046809 | -0.74386  | -0.043294 | H | -3.619491 | -1.979677 | 1.719159  |
| C | -4.239964 | -1.998527 | 0.819845  | H | -4.87735  | 0.052342  | -1.894535 |
| C | -5.15073  | -0.67031  | -1.121889 | H | -5.233152 | -1.6464   | -1.616907 |
| C | -6.524701 | -0.274218 | -0.579214 | H | -7.295821 | -0.403862 | -1.3504   |
| C | -6.591822 | 1.171867  | -0.14129  | H | -6.84135  | -0.901106 | 0.260874  |
| O | -7.711346 | 1.422968  | 0.573971  | H | -7.702476 | 2.374237  | 0.795008  |
| O | -5.777991 | 2.038676  | -0.396402 | H | 2.250285  | 0.219608  | 3.305303  |
| C | 2.896829  | -0.575603 | 2.921481  | H | 3.927143  | -0.350532 | 3.219686  |
| C | 3.765093  | -1.793494 | 0.908793  | H | 2.594346  | -1.517018 | 3.386211  |
| C | 3.128508  | 0.65176   | 0.697344  | H | 4.78745   | -1.502312 | 1.174859  |
| C | 2.874484  | 3.188217  | 0.708724  | H | 3.529027  | -2.701568 | 1.471526  |
| C | 2.429324  | 4.322631  | 1.601415  | H | 1.346039  | 4.467469  | 1.507354  |
| O | 3.69805   | 3.346568  | -0.186403 | H | 2.626073  | 4.073882  | 2.651334  |
| C | 3.710207  | -2.156426 | -0.586911 | H | 2.949992  | 5.244066  | 1.334669  |
| C | 4.115498  | -1.061826 | -1.549684 | H | 4.392114  | -2.999647 | -0.754726 |
| O | 5.314822  | -0.535429 | -1.22911  | H | 2.709619  | -2.483114 | -0.87513  |
| O | 3.46957   | -0.699432 | -2.515736 | H | 5.104361  | 1.451901  | -1.812029 |
| C | 5.742739  | 0.589136  | -2.022653 | H | 6.767096  | 0.791887  | -1.711836 |
| H | 4.160319  | 0.87564   | 0.45736   | H | 5.702501  | 0.347191  | -3.086178 |
| H | 2.199825  | 1.43578   | -1.240555 |   |           |           |           |
| H | 1.51023   | 1.812324  | 1.756957  |   |           |           |           |
| H | -1.568952 | -2.407157 | 1.600183  |   |           |           |           |

**Table S9. Atomic coordinates (Å) of 3-3 obtained at the Cam-B3LYP/6-311+G(d,p) level of theory in the MeOH.**

|   |           |           |           |   |           |           |           |
|---|-----------|-----------|-----------|---|-----------|-----------|-----------|
| C | -2.830567 | -0.689934 | -1.430543 | H | 0.892765  | -2.84227  | 0.038079  |
| C | -2.302268 | 1.857478  | -1.056942 | H | 0.475589  | 1.427938  | 2.257021  |
| C | -1.026725 | -0.032334 | 0.008477  | H | 0.837853  | 1.941083  | 0.613658  |
| C | -1.409647 | -0.939055 | -0.9275   | H | 3.094428  | 1.438762  | 1.105227  |
| C | 0.259729  | -0.160121 | 0.75781   | H | 2.658246  | 0.54156   | 2.546426  |
| C | 1.359086  | -0.721254 | -0.214889 | H | 2.541277  | -1.508739 | 1.410107  |
| C | 0.885565  | -2.081511 | -0.75289  | H | 1.959183  | 1.201644  | -1.121502 |
| C | -0.537057 | -2.041249 | -1.335537 | H | 2.30721   | -0.215726 | -2.107291 |
| C | 0.930152  | 1.106682  | 1.314781  | H | 0.655339  | 0.383143  | -1.986073 |
| C | 2.413026  | 0.673549  | 1.488895  | H | 0.801507  | -1.168878 | 2.647426  |
| C | 2.613471  | -0.670252 | 0.704768  | H | -0.894316 | -0.685517 | 2.523304  |
| C | 1.576829  | 0.222927  | -1.421219 | H | -0.326404 | -2.103802 | 1.647033  |
| C | -0.047804 | -1.095721 | 1.963396  | H | 4.126295  | 0.096507  | -0.615448 |
| O | -0.908871 | -2.930915 | -2.104524 | H | 3.924386  | -2.932033 | -0.174169 |
| C | -2.063206 | 1.004648  | 0.199524  | H | 5.236512  | -2.172262 | -1.085105 |
| C | 4.007236  | -0.765801 | 0.051932  | H | 3.58383   | -2.054028 | -1.673538 |
| C | 4.195208  | -2.050011 | -0.767817 | H | 4.829794  | 0.081772  | 1.884029  |
| C | 5.103201  | -0.66705  | 1.136663  | H | 5.17363   | -1.627662 | 1.662826  |
| C | 6.484558  | -0.299443 | 0.592714  | H | 7.248947  | -0.412112 | 1.373189  |
| C | 6.56757   | 1.131867  | 0.111187  | H | 6.801732  | -0.954421 | -0.225498 |
| O | 7.696778  | 1.352557  | -0.598797 | H | 7.697539  | 2.296544  | -0.849313 |
| O | 5.757537  | 2.012038  | 0.330116  | H | -2.275607 | 0.182588  | -3.356375 |
| C | -2.925414 | -0.605223 | -2.963213 | H | -3.954124 | -0.382581 | -3.268373 |
| C | -3.789251 | -1.809396 | -0.942614 | H | -2.622826 | -1.55372  | -3.413265 |
| C | -3.171356 | 0.651513  | -0.754291 | H | -4.810628 | -1.556317 | -1.250216 |
| C | -2.921677 | 3.189853  | -0.819688 | H | -3.508477 | -2.729734 | -1.462069 |
| C | -2.517259 | 4.295465  | -1.766348 | H | -3.039765 | 5.220695  | -1.516836 |
| O | -3.713059 | 3.371713  | 0.09921   | H | -1.433296 | 4.454845  | -1.710918 |
| C | -3.783964 | -2.096906 | 0.568704  | H | -2.742998 | 4.006658  | -2.800061 |
| C | -4.448425 | -1.006365 | 1.377907  | H | -4.359488 | -3.013382 | 0.746868  |
| O | -3.676955 | -0.585561 | 2.398672  | H | -2.771429 | -2.2675   | 0.937886  |
| O | -5.553022 | -0.549193 | 1.146986  | H | -5.166096 | 0.246913  | 3.60922   |
| C | -4.205163 | 0.514614  | 3.164959  | H | -3.464761 | 0.711762  | 3.939163  |
| H | -4.201736 | 0.87365   | -0.504086 | H | -4.330334 | 1.389366  | 2.521302  |
| H | -2.221685 | 1.492172  | 1.153875  |   |           |           |           |
| H | -1.567647 | 1.79206   | -1.853187 |   |           |           |           |
| H | 1.531188  | -2.465897 | -1.545966 |   |           |           |           |

**Table S10. Atomic coordinates (Å) of 3-4 obtained at the Cam-B3LYP/6-311+G(d,p) level of theory in the MeOH.**

|   |           |           |           |   |           |           |           |
|---|-----------|-----------|-----------|---|-----------|-----------|-----------|
| C | -3.153679 | 0.39634   | -0.869514 | H | 0.165579  | -2.356128 | 0.316631  |
| C | -2.25723  | 2.804436  | -0.325539 | H | 0.830543  | 1.911184  | 2.428515  |
| C | -1.158136 | 0.670856  | 0.445269  | H | 1.080915  | 2.31793   | 0.734748  |
| C | -1.761872 | -0.109811 | -0.48915  | H | 3.265316  | 1.451443  | 1.011653  |
| C | 0.179718  | 0.347103  | 1.029811  | H | 2.840126  | 0.650505  | 2.511939  |
| C | 1.049861  | -0.390264 | -0.051639 | H | 2.271354  | -1.360721 | 1.441925  |
| C | 0.288462  | -1.64443  | -0.509325 | H | 1.811142  | -0.068956 | -2.065501 |
| C | -1.118181 | -1.312966 | -1.019991 | H | 0.354146  | 0.862516  | -1.730203 |
| C | 1.110818  | 1.495965  | 1.455701  | H | 1.905356  | 1.377159  | -1.06596  |
| C | 2.509419  | 0.816122  | 1.482791  | H | -0.679563 | -1.409939 | 2.073545  |
| C | 2.394537  | -0.548252 | 0.714271  | H | 0.801346  | -0.770312 | 2.830548  |
| C | 1.289163  | 0.504273  | -1.29344  | H | -0.723667 | 0.097268  | 2.983656  |
| C | -0.115457 | -0.504606 | 2.298342  | H | 3.8517    | -0.045797 | -0.785604 |
| O | -1.68584  | -2.065692 | -1.816335 | H | 2.843399  | -2.075192 | -1.732524 |
| C | -2.023106 | 1.81157   | 0.823414  | H | 3.201572  | -2.997333 | -0.263967 |
| C | 3.668281  | -0.875044 | -0.091571 | H | 4.509399  | -2.468324 | -1.331091 |
| C | 3.545924  | -2.173363 | -0.901354 | H | 4.826084  | -0.170164 | 1.61498   |
| C | 4.881967  | -0.959133 | 0.860964  | H | 4.8481    | -1.914488 | 1.400225  |
| C | 6.234886  | -0.836928 | 0.158195  | H | 7.052452  | -1.071784 | 0.852909  |
| C | 6.503581  | 0.555165  | -0.36826  | H | 6.342683  | -1.54323  | -0.671542 |
| O | 7.560356  | 0.572171  | -1.211447 | H | 7.69287   | 1.500197  | -1.485466 |
| O | 5.889047  | 1.564056  | -0.079616 | H | -2.551874 | 1.402438  | -2.7229   |
| C | -3.288561 | 0.670662  | -2.379223 | H | -4.287406 | 1.061137  | -2.605877 |
| C | -4.291388 | -0.578107 | -0.46373  | H | -3.139199 | -0.25503  | -2.940208 |
| C | -3.248552 | 1.690496  | -0.035022 | H | -5.227998 | -0.008896 | -0.472972 |
| C | -2.660002 | 4.18243   | 0.065526  | H | -4.385492 | -1.350624 | -1.229766 |
| C | -2.175078 | 5.300231  | -0.828482 | H | -1.078728 | 5.300353  | -0.864459 |
| O | -3.345229 | 4.390386  | 1.060187  | H | -2.526118 | 5.139874  | -1.85516  |
| C | -4.133573 | -1.265266 | 0.908692  | H | -2.532815 | 6.263637  | -0.460703 |
| C | -3.354691 | -2.56227  | 0.841358  | H | -3.645224 | -0.615372 | 1.637995  |
| O | -3.914723 | -3.421221 | -0.028025 | H | -5.128533 | -1.513837 | 1.296576  |
| O | -2.359121 | -2.834459 | 1.488555  | H | -2.223254 | -4.406064 | -0.71987  |
| C | -3.186715 | -4.64079  | -0.262524 | H | -3.035051 | -5.184615 | 0.672293  |
| H | -4.214811 | 2.010564  | 0.341484  | H | -3.804209 | -5.221139 | -0.947476 |
| H | -2.032011 | 2.219882  | 1.82853   |   |           |           |           |
| H | -1.612736 | 2.715253  | -1.193926 |   |           |           |           |
| H | 0.796317  | -2.181827 | -1.312937 |   |           |           |           |

**Table S11. Atomic coordinates (Å) of 3-5 obtained at the Cam-B3LYP/6-311+G(d,p) level of theory in the MeOH.**

|   |           |           |           |   |           |           |           |
|---|-----------|-----------|-----------|---|-----------|-----------|-----------|
| C | -2.741717 | -0.666045 | -1.438733 | H | 1.083615  | -2.745604 | -0.062543 |
| C | -2.310669 | 1.87572   | -0.90264  | H | 0.395446  | 1.312848  | 2.470357  |
| C | -0.999385 | -0.030994 | 0.081966  | H | 0.737608  | 1.979672  | 0.878608  |
| C | -1.324888 | -0.89213  | -0.916478 | H | 3.006452  | 1.569902  | 1.327184  |
| C | 0.279491  | -0.155577 | 0.845111  | H | 2.636284  | 0.557557  | 2.710401  |
| C | 1.41992   | -0.585294 | -0.149408 | H | 2.612853  | -1.422983 | 1.440584  |
| C | 1.025244  | -1.926744 | -0.790438 | H | 1.91184   | 1.431506  | -0.904371 |
| C | -0.399133 | -1.929626 | -1.371615 | H | 2.377547  | 0.112321  | -1.974998 |
| C | 0.873213  | 1.096836  | 1.509957  | H | 0.687019  | 0.591959  | -1.859498 |
| C | 2.377934  | 0.738412  | 1.663529  | H | -0.19585  | -2.195056 | 1.567657  |
| C | 2.656637  | -0.536561 | 0.794611  | H | 0.840718  | -1.267746 | 2.668805  |
| C | 1.60352   | 0.453107  | -1.28106  | H | -0.883948 | -0.892243 | 2.527304  |
| C | 0.004806  | -1.198242 | 1.967806  | H | 4.159559  | 0.394443  | -0.429606 |
| O | -0.725929 | -2.7986   | -2.183496 | H | 5.365385  | -1.69536  | -1.130387 |
| C | -2.079717 | 0.955225  | 0.307519  | H | 3.675929  | -1.738039 | -1.603678 |
| C | 4.068473  | -0.52065  | 0.172456  | H | 4.212697  | -2.665695 | -0.195065 |
| C | 4.343733  | -1.722454 | -0.739982 | H | 4.888145  | 0.404642  | 1.956324  |
| C | 5.116664  | -0.44118  | 1.302619  | H | 5.051538  | -1.346039 | 1.920661  |
| C | 6.575923  | -0.292119 | 0.825455  | H | 7.217864  | -0.115102 | 1.695808  |
| C | 6.737985  | 0.861437  | -0.133408 | H | 6.933734  | -1.191238 | 0.321529  |
| O | 6.443674  | 2.047028  | 0.449834  | H | 6.540002  | 2.735044  | -0.236373 |
| O | 7.063249  | 0.775866  | -1.301526 | H | -3.839492 | -0.30849  | -3.282996 |
| C | -2.808691 | -0.504198 | -2.966383 | H | -2.456885 | -1.41385  | -3.458944 |
| C | -3.678603 | -1.833706 | -1.026834 | H | -2.185505 | 0.330404  | -3.302092 |
| C | -3.143063 | 0.623687  | -0.702258 | H | -4.705085 | -1.569566 | -1.304961 |
| C | -2.991121 | 3.166097  | -0.608185 | H | -3.395517 | -2.707482 | -1.621169 |
| C | -2.577908 | 4.350426  | -1.449973 | H | -2.744731 | 4.132727  | -2.511908 |
| O | -3.837808 | 3.256555  | 0.274664  | H | -3.142208 | 5.238674  | -1.160352 |
| C | -3.643038 | -2.257679 | 0.453223  | H | -1.503682 | 4.537042  | -1.329234 |
| C | -4.109555 | -1.220394 | 1.450908  | H | -4.296604 | -3.13141  | 0.569828  |
| O | -5.320633 | -0.725182 | 1.12529   | H | -2.637562 | -2.559784 | 0.751013  |
| O | -3.498354 | -0.875867 | 2.445665  | H | -6.831169 | 0.527228  | 1.628665  |
| C | -5.807599 | 0.347491  | 1.955771  | H | -5.783328 | 0.060354  | 3.008489  |
| H | -4.188245 | 0.79773   | -0.479434 | H | -5.196455 | 1.24079   | 1.798604  |
| H | -2.292345 | 1.364392  | 1.287827  |   |           |           |           |
| H | -1.547505 | 1.887842  | -1.674279 |   |           |           |           |
| H | 1.687545  | -2.208879 | -1.612406 |   |           |           |           |

**Table S12. Atomic coordinates (Å) of 3-6 obtained at the Cam-B3LYP/6-311+G(d,p) level of theory in the MeOH.**

|   |           |           |           |   |           |           |           |
|---|-----------|-----------|-----------|---|-----------|-----------|-----------|
| C | 2.632342  | 0.016763  | 1.567426  | H | -1.761599 | -1.181504 | 1.800101  |
| C | 2.698618  | 1.835883  | -0.334578 | H | -0.71321  | 0.401955  | -2.644578 |
| C | 0.806003  | 0.219608  | 0.026269  | H | -0.549544 | 1.893254  | -1.725449 |
| C | 1.124582  | -0.005684 | 1.327335  | H | -2.894586 | 2.031481  | -1.740309 |
| C | -0.596642 | 0.101818  | -0.475209 | H | -3.073982 | 0.382005  | -2.311087 |
| C | -1.572921 | 0.654939  | 0.62704   | H | -3.183504 | -0.521043 | -0.139376 |
| C | -1.372519 | -0.161866 | 1.914092  | H | -0.260255 | 2.286415  | 1.305477  |
| C | 0.101333  | -0.278745 | 2.337009  | H | -1.431554 | 2.790969  | 0.084368  |
| C | -1.014466 | 0.903143  | -1.719614 | H | -1.955947 | 2.485149  | 1.738368  |
| C | -2.559618 | 1.001834  | -1.574575 | H | -0.785573 | -2.031133 | 0.09727   |
| C | -2.929411 | 0.543835  | -0.124816 | H | -1.75713  | -1.578605 | -1.317405 |
| C | -1.282621 | 2.139077  | 0.948554  | H | -0.000112 | -1.748233 | -1.450244 |
| C | -0.809911 | -1.406451 | -0.799109 | H | -3.935299 | 2.365038  | 0.403628  |
| O | 0.382492  | -0.60771  | 3.491964  | H | -4.505179 | -0.164055 | 2.038412  |
| C | 2.013701  | 0.530053  | -0.771187 | H | -5.45518  | 1.323647  | 2.185781  |
| C | -4.156318 | 1.289563  | 0.435815  | H | -3.73716  | 1.328079  | 2.584778  |
| C | -4.478244 | 0.921686  | 1.892078  | H | -6.16959  | 1.809769  | -0.119322 |
| C | -5.405761 | 1.100053  | -0.457809 | H | -5.174905 | 1.361496  | -1.49529  |
| C | -6.054249 | -0.298982 | -0.437171 | H | -6.25544  | -0.632422 | 0.58258   |
| C | -5.258063 | -1.352915 | -1.169386 | H | -7.018797 | -0.236619 | -0.955518 |
| O | -4.99811  | -2.435169 | -0.400371 | H | -4.495177 | -3.064962 | -0.953017 |
| O | -4.88875  | -1.276093 | -2.326124 | H | 4.144859  | 0.962676  | 2.812782  |
| C | 3.053854  | 0.956603  | 2.70902   | H | 2.613184  | 0.627326  | 3.653049  |
| C | 3.166174  | -1.407249 | 1.880625  | H | 2.724968  | 1.982328  | 2.515982  |
| C | 3.158131  | 0.494013  | 0.202944  | H | 4.26072   | -1.367633 | 1.915157  |
| C | 3.583628  | 2.46848   | -1.349988 | H | 2.818941  | -1.675514 | 2.882828  |
| C | 3.643132  | 3.97784   | -1.34129  | H | 3.974697  | 4.334405  | -0.358455 |
| O | 4.224699  | 1.794395  | -2.14951  | H | 4.324074  | 4.336772  | -2.115132 |
| C | 2.72485   | -2.534305 | 0.928602  | H | 2.640815  | 4.391348  | -1.507168 |
| C | 3.197285  | -2.415902 | -0.503909 | H | 3.120035  | -3.480435 | 1.319551  |
| O | 4.529886  | -2.223934 | -0.575717 | H | 1.637299  | -2.620913 | 0.901155  |
| O | 2.486571  | -2.504569 | -1.488215 | H | 4.722579  | -1.017811 | -2.261367 |
| C | 5.063223  | -1.990228 | -1.894334 | H | 6.146142  | -1.991055 | -1.774798 |
| H | 4.1451    | 0.184396  | -0.116784 | H | 4.74969   | -2.778242 | -2.581287 |
| H | 2.105256  | 0.248467  | -1.813297 |   |           |           |           |
| H | 2.137062  | 2.502906  | 0.311882  |   |           |           |           |
| H | -1.902682 | 0.267764  | 2.767534  |   |           |           |           |

## Uncropped images of western blot

Figure S82. Uncropped images of western blot in figure 5 of paper.

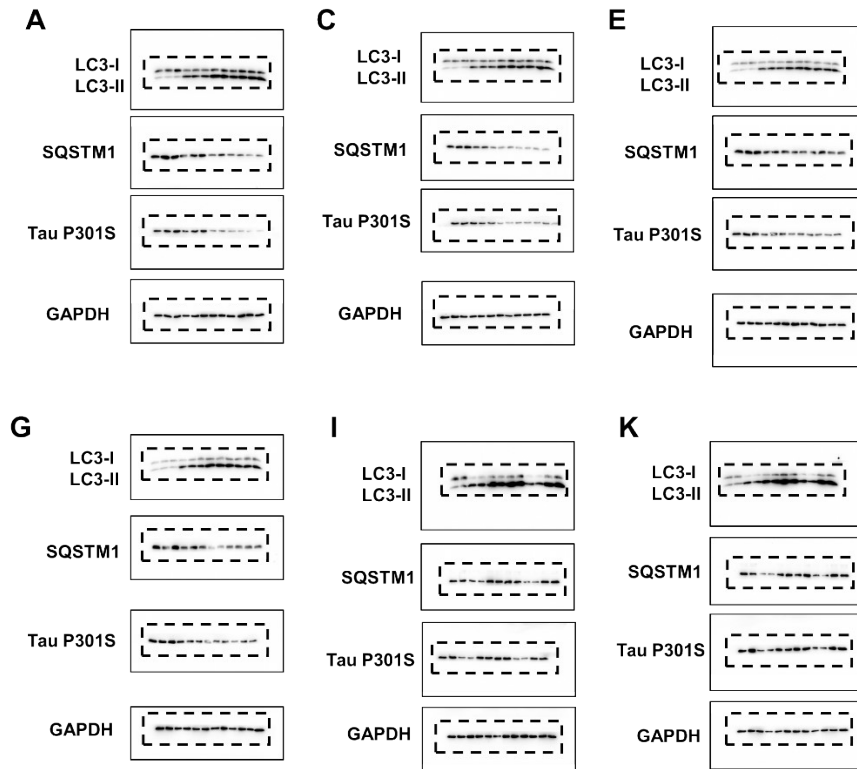



Figure S83. Uncropped images of western blot in figure S6 of Supplementary information.

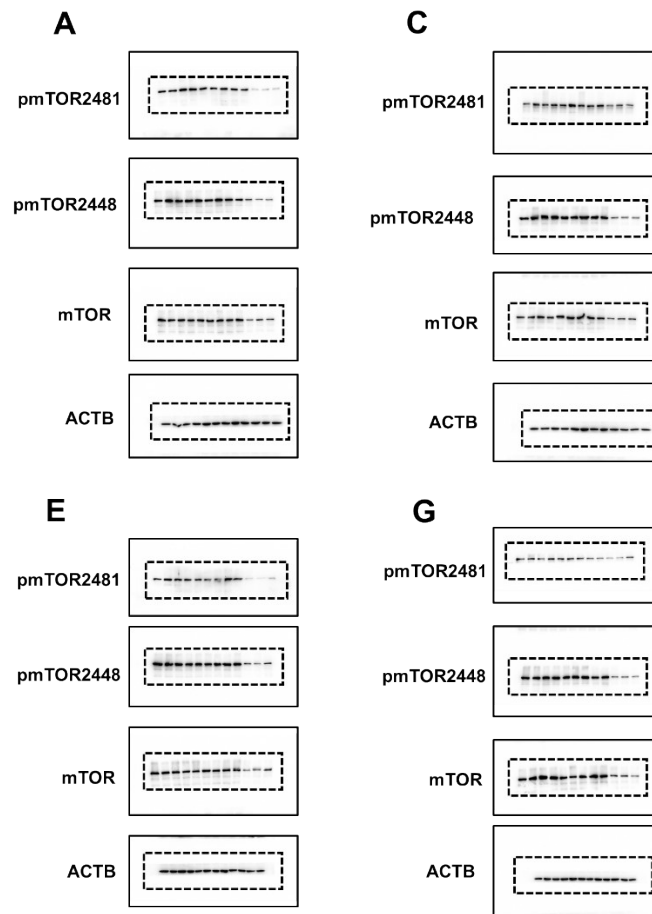

Figure S84. Uncropped images of western blot in figure 6 of paper.

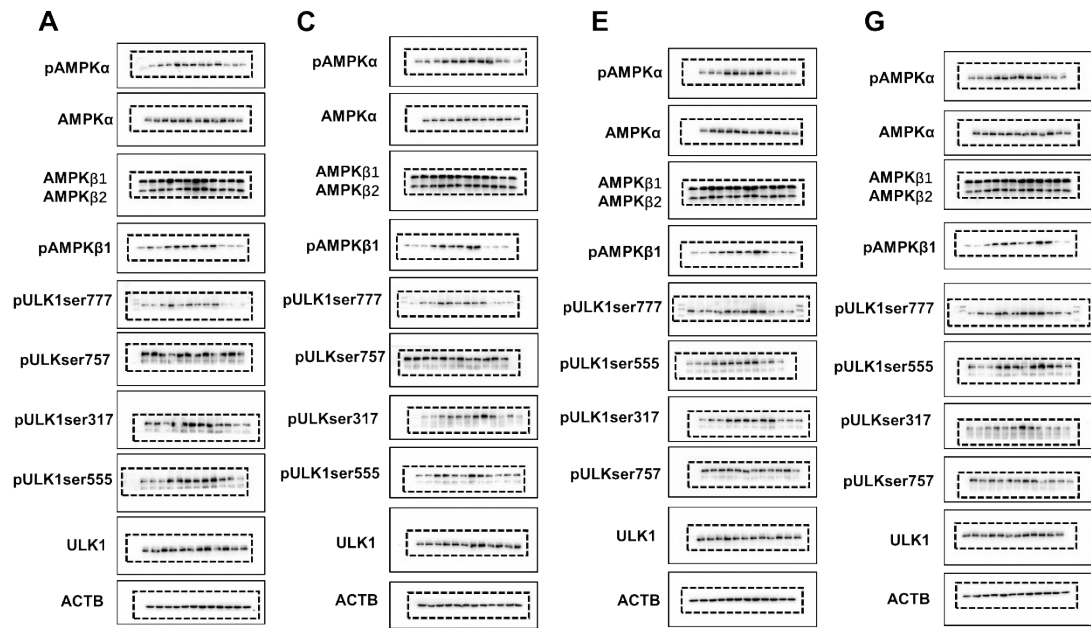

## References:

- [1] X. Peng, R. Luo, X. Ran, Y. Guo, Y. G. Yao, M. Qiu, *Bioorg. Chem.* **2023**, *132*, 106375.
- [2] L. Feng, Y. Ma, J. Sun, Q. Shen, L. Liu, H. Lu, F. Wang, Y. Yue, J. Li, S. Zhang, X. Lin, J. Chu, W. Han, X. Wang, H. Jin, *Autophagy* **2014**, *10*, 1442-1453.
- [3] B. Ravikumar, C. Vacher, Z. Berger, J. E. Davies, S. Luo, L. G. Oroz, F. Scaravilli, D. F. Easton, R. Duden, C. J. O'Kane, D. C. Rubinsztein, *Nat. Genet.* **2004**, *36*, 585-595.
